# Supplementary material for: Structure revision and chemical synthesis of ligandrol's main bishydroxylated long-term metabolic marker
Source: Royal Society of Chemistry journal article supplement (doi:10.1039/d2ob01907h), 2022-01-01
Supplement: d2ob01907h1.pdf [file d2ob01907h1.pdf]

## SUPPLEMENTARY INFORMATION

### Structure revision and chemical synthesis of ligandrol's main bishydroxylated long-term metabolic marker

Emmanuel N. Pitsinos,<sup>\*a</sup> Yiannis S. Angelis<sup>\*b</sup> and Michael Petrou<sup>c</sup>

<sup>a</sup> National Centre for Scientific Research "DEMOKRITOS", Institute of Nanoscience and Nanotechnology, "Natural Products Synthesis and Bioorganic Chemistry" Laboratory, P.O. Box 60037, GR 153 10 Aghia Paraskevi, Athens, Greece.

<sup>b</sup> National Centre for Scientific Research "DEMOKRITOS", Institute of Biosciences & Applications, Doping Control Laboratory of Athens, Neratziotissis & Amaryssias Artemidos Str, GR 151 23 Athens, Greece.

<sup>c</sup> Cyprus Anti-Doping Authority, Makarion Athletic Centre Avenue, Engomi, CY 2400 Nicosia, Cyprus.

#### CONTENT

|                                                                                                     |        |
|-----------------------------------------------------------------------------------------------------|--------|
| <b>I. Experimental Section</b> .....                                                                | S3–S7  |
| <b>Ia. Chemical Synthesis</b> .....                                                                 | S3     |
| <b>Ib. LC-HRMS Analysis</b> .....                                                                   | S7     |
| <b>II. References</b> .....                                                                         | S7     |
| <b>III. NMR Spectra of Compounds</b> .....                                                          | S8–S34 |
| Partially purified <b>LGD-4033</b> <sup>1</sup> H NMR spectrum (500 MHz, CD <sub>3</sub> OD) .....  | S8     |
| Partially purified <b>LGD-4033</b> <sup>1</sup> H NMR spectrum (250 MHz, CDCl <sub>3</sub> ).....   | S9     |
| Partially purified <b>LGD-4033</b> COSY NMR spectrum (250 MHz, CDCl <sub>3</sub> ).....             | S10    |
| Partially purified <b>LGD-4033</b> <sup>13</sup> C NMR spectrum (62.5 MHz, CDCl <sub>3</sub> )..... | S11    |
| Partially purified <b>LGD-4033</b> HSQC NMR spectrum.....                                           | S12    |
| Slily ether <b>5</b> <sup>1</sup> H NMR spectrum (250 MHz, CDCl <sub>3</sub> ) .....                | S13    |
| Slily ether <b>5</b> COSY NMR spectrum (250 MHz, CDCl <sub>3</sub> ) .....                          | S14    |
| Slily ether <b>5</b> <sup>13</sup> C NMR spectrum (62.5 MHz, CDCl <sub>3</sub> ) .....              | S15    |
| Slily ether <b>5</b> HSQC NMR spectrum .....                                                        | S16    |
| Pyrrolidinone <b>6</b> <sup>1</sup> H NMR spectrum (500 MHz, CDCl <sub>3</sub> ) .....              | S17    |
| Pyrrolidinone <b>6</b> COSY NMR spectrum (500 MHz, CDCl <sub>3</sub> ).....                         | S18    |
| Pyrrolidinone <b>6</b> <sup>13</sup> C NMR spectrum (125 MHz, CDCl <sub>3</sub> ).....              | S19    |
| Pyrrolidinone <b>6</b> <sup>13</sup> C NMR spectrum (62.5 MHz, CDCl <sub>3</sub> ).....             | S20    |
| Pyrrolidinone <b>6</b> HSQC NMR spectrum.....                                                       | S21    |
| Pyrrolidinone <b>6</b> HMBC NMR spectrum.....                                                       | S22    |
| Pyrrolidinone <b>7</b> <sup>1</sup> H NMR spectrum (500 MHz, CD <sub>3</sub> OD) .....              | S23    |
| Pyrrolidinone <b>7</b> COSY NMR spectrum (500 MHz, CD <sub>3</sub> OD).....                         | S24    |
| Pyrrolidinone <b>7</b> <sup>13</sup> C NMR spectrum (125 MHz, CD <sub>3</sub> OD) .....             | S25    |
| Pyrrolidinone <b>7</b> <sup>13</sup> C NMR spectrum (62.5 MHz, CD <sub>3</sub> OD) .....            | S26    |
| Pyrrolidinone <b>7</b> HSQC NMR spectrum.....                                                       | S27    |
| Pyrrolidinone <b>7</b> HMBC NMR spectrum.....                                                       | S28    |

|                                                                                                                                                                                      |         |
|--------------------------------------------------------------------------------------------------------------------------------------------------------------------------------------|---------|
| 4-(Arylamino)hexanoic acid <b>4</b> <sup>1</sup> H NMR spectrum (500 MHz, CD <sub>3</sub> OD) .....                                                                                  | S29     |
| 4-(Arylamino)hexanoic acid <b>4</b> COSY NMR spectrum (500 MHz, CD <sub>3</sub> OD) .....                                                                                            | S30     |
| 4-(Arylamino)hexanoic acid <b>4</b> <sup>13</sup> C NMR spectrum (125 MHz, CD <sub>3</sub> OD) .....                                                                                 | S31     |
| 4-(Arylamino)hexanoic acid <b>4</b> <sup>13</sup> C NMR spectrum (62.5 MHz, CD <sub>3</sub> OD) .....                                                                                | S32     |
| 4-(Arylamino)hexanoic acid <b>4</b> HSQC NMR spectrum .....                                                                                                                          | S33     |
| 4-(Arylamino)hexanoic acid <b>4</b> HMBC NMR spectrum .....                                                                                                                          | S34     |
| <b>IV. LC–HRMS Analysis of 4-(Arylamino)hexanoic Acid 4</b> .....                                                                                                                    | S35–S40 |
| Full scan mass spectrum of compound <b>4</b> .....                                                                                                                                   | S35     |
| Product ion mass spectrum of <i>m/z</i> 369 from compound <b>4</b> .....                                                                                                             | S36     |
| Product ion mass spectrum of <i>m/z</i> 369 from a LGD-4033-positive human urine sample.....                                                                                         | S37     |
| Comparative analysis of 4-arylamino-5-hydroxyhexanoic acid <b>4</b> and a LGD-4033-positive human urine sample with LC–HRMS in negative ionization mode at the <i>m/z</i> 369: ..... | S38–41  |
| (a) Blank .....                                                                                                                                                                      | S38     |
| (b) Urine-derived sample .....                                                                                                                                                       | S39     |
| (c) Synthetic metabolite <b>4</b> .....                                                                                                                                              | S40     |
| (d) Co-injection of <b>4</b> and urine-derived sample .....                                                                                                                          | S41     |

## I. Experimental Section

### Ia. Chemical Synthesis

#### General methods

All reactions were carried out under a dry argon atmosphere with anhydrous solvents (freshly distilled over the appropriate desiccant or dried over 3 Å molecular sieves)<sup>1</sup> under anhydrous conditions, unless otherwise noted. All reactions were magnetically stirred with Teflon stir bars, and temperatures were measured externally. Reactions requiring anhydrous conditions were carried out in oven dried (120 °C, 24 h) or flame dried (vacuum < 0.5 Torr) glassware. All reagents were purchased at the highest commercial quality and used without further purification, unless otherwise stated. Yields refer to chromatographically and spectroscopically homogeneous materials, unless otherwise noted. All reactions were monitored by Thin Layer Chromatography (TLC) carried out on 0.25 mm E. Merck silica gel plates (60F<sub>254</sub>). UV light was used for visualization and an acidified ethanolic solution of *p*-anisaldehyde or an acidified aqueous solution of ceric ammonium molybdate and heat were used as developing agents.<sup>2</sup> E. Merck silica gel (60 Å, particle size 0.040–0.063 mm) or Acros Organics silica gel (60 Å, particle size 0.035–0.070 mm) were used for flash column chromatography.<sup>3</sup> Optical rotations were recorded using a Perkin-Elmer 241 polarimeter at the sodium D line (589 nm) using a 10 cm path-length cell in the solvent and concentration indicated. Nuclear Magnetic Resonance (NMR) spectra were recorded using a Bruker Avance DRX 500 MHz or Bruker Avance III 250 MHz instrument and were calibrated using as internal reference the residual nondeuterated solvent for <sup>1</sup>H-NMR and the deuterated solvent for <sup>13</sup>C-NMR, respectively (*e.g.*, CDCl<sub>3</sub>:  $\delta_H$  = 7.26 ppm,  $\delta_C$  = 77.16 ppm; CD<sub>3</sub>OD:  $\delta_H$  = 3.31 ppm,  $\delta_C$  = 49.00 ppm).<sup>4,5</sup> Multiplicities are designated as singlet (s), doublet (d), triplet (t), quartet (q), quintet (quint.) or multiplet (m). Broad or obscured peaks are indicated as “br” or “obs”, respectively. To facilitate NMR spectra comparisons, the established LGD-4033 skeleton numbering<sup>7</sup> has been used for all compounds when assigning signals. High resolution mass spectra (HRMS) were acquired on a LC qExactive plus HRMS (Thermo Scientific, Bremen, Germany) instrument.

#### 4-{{(2R)-2-[(1R)-2,2,2-trifluoro-1-hydroxyethyl]pyrrolidin-1-yl}-2-(trifluoromethyl)benzonitrile (1: LGD-4033):

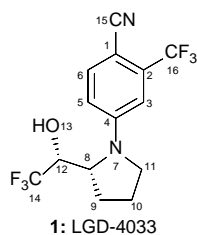

capsules of ligandrol sold over the Internet with the warning that the material is “intended for laboratory and research purposes only” and stated to contain 8 mg of LGD-4033 (>97% purity) / capsule were obtained *via* an online order. The content of ten capsules (3.8 g) was placed in a centrifuge tube, suspended in methanol (10 mL) and sonicated for 15 min. Upon centrifugation, the supernatant was filtered through a short pad of Celite. The solids remaining in the centrifuge tube were subjected four more times to the above procedure and the unified filtrates were evaporated under reduced pressure to dryness. The amorphous white solid thus obtained was dissolved in 10% MeOH in dichloromethane (10 mL), silica gel (0.5 g) was added, and volatiles were removed

under reduced pressure. The residue was loaded on top of a chromatography column (silica gel) and eluted with dichloromethane to provide LGD-4033 (32.6 mg) as amorphous white solid that was used without further purification.  $R_f$  = 0.12 (silica gel, CH<sub>2</sub>Cl<sub>2</sub>); <sup>1</sup>H NMR (500 MHz, CD<sub>3</sub>OD):  $\delta$  = 7.64 (d,  $J$  = 8.8 Hz, 1 H, H-6), 7.14 (s, 1 H, H-3), 6.97 (dd,  $J$  = 8.8, 2.5 Hz, 1 H, H-5), 4.25 (t,  $J$  = 7.8 Hz, 1 H, H-8), 3.97 (quint.,  $J$  = 7.2 Hz, 1 H, H-12), 3.59 (ddd,  $J$  = 9.8, 6.8, 2.9 Hz, 1 H, H-11), 3.33–3.28 (obs, 1 H, H-11'), 2.19–2.04 (m, 4 H, H-10 & H-10' & H-9 & H-9') ppm; <sup>1</sup>H NMR (250 MHz, CDCl<sub>3</sub>):  $\delta$  = 7.52 (d,  $J$  = 8.7 Hz, 1 H, H-6), 7.06 (d,  $J$  = 2.5 Hz, 1 H, H-3), 6.90 (dd,  $J$  = 8.7, 2.5 Hz, 1 H, H-5), 4.26–4.20 (m, 1 H, H-8), 3.98–3.85 (m, 1 H, H-12), 3.65–3.58 & 3.33–3.23 (2 m, 2 H, H-11 & H-11'), 2.94 (d,  $J$  = 4.5 Hz, 1 H, OH), 2.22–2.00 (m, 4 H, H-10 & H-10' & H-9 & H-9') ppm; <sup>13</sup>C NMR (62.5 MHz, CDCl<sub>3</sub>):  $\delta$  = 151.3 (s), 135.7 (s, C-6), 133.8 (q,  $J$  = 32 Hz), 124.7 (q,  $J$  = 283 Hz), 122.7 (q,  $J$  = 274 Hz), 117.3 (s), 115.4 (s, C-5), 111.1 (q,  $J$  = 5 Hz, C-3), 95.6 (s), 72.3 (q,  $J$  =

29 Hz, C-12), 58.6 (s, C-8), 49.4 (s, C-11), 29.2 & 23.0 (2 s, C-9 & C-10) ppm. The above data are in accordance with the ones previously reported.<sup>6-8</sup>

**4-((2R)-2-((1R)-1-((tert-butyldimethylsilyloxy)-2,2-trifluoroethyl)pyrrolidin-1-yl)-2-(trifluoromethyl)benzonitrile (5):** The above partially purified LGD-4033 (32.6 mg, 96.4  $\mu$ mol) was placed in a 5 mL pear-shaped flask and imidazole (195 mg, 2.86 mmol), TBDMSCl (241 mg, 1.60 mmol), and DMF (0.15 mL) were added sequentially under an argon atmosphere. The mixture was stirred at ambient temperature for 48 h. Volatiles were removed under reduced pressure and the residue was dissolved in dichloromethane (2 mL). Silica gel (0.5 g) was added, volatiles were removed under reduced pressure, the residue was loaded on top of a chromatography column (silica gel), and eluted with *n*-hexane/dichloromethane 75:25 to provide TBS-protected LGD-4033 (**5**) as amorphous white solid (41.4 mg, 91.5  $\mu$ mol, 94.9% yield).  $R_f$  = 0.71 (silica gel, CH<sub>2</sub>Cl<sub>2</sub>);

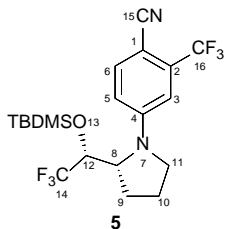

$[\alpha]_D^{25}$  = +20 ( $c$  = 0.97, CH<sub>2</sub>Cl<sub>2</sub>); **<sup>1</sup>H NMR** (250 MHz, CDCl<sub>3</sub>):  $\delta$  = 7.57 (d,  $J$  = 8.8 Hz, 1 H, H-6), 7.02 (br s, 1 H, H-3), 6.79 (dd,  $J$  = 8.8, 2.7 Hz, 1 H, H-5), 4.20–4.14 (m, 1 H, H-8), 3.81 (dq,  $J$  = 8.8, 6.0 Hz, 1 H, H-12), 3.55–3.48 (m, 1 H, H-11), 3.30–3.19 (m, 1 H, H-11'), 2.23–1.98 (m, 4 H, H-9 & H-10), 0.66 (s, 9 H, (CH<sub>3</sub>)<sub>3</sub>CSi), 0.05 & –0.23 (2 s, 6 H, CH<sub>3</sub>SiCH<sub>3</sub>) ppm; **<sup>13</sup>C NMR** (62.5 MHz, CDCl<sub>3</sub>):  $\delta$  = 151.1 (s), 135.6 (s, C-6), 133.8 (q,  $J$  = 32 Hz), 124.9 (q,  $J$  = 284 Hz), 122.8 (q,  $J$  = 274 Hz), 117.4 (s), 115.0 (s, C-5), 111.3 (s, C-3), 95.4 (s), 73.4 (q,  $J$  = 28 Hz, C-12), 58.6 (s, C-8), 49.0 (s, C-11), 29.4 (s, C-10), 25.3 (s, CH<sub>3</sub>)<sub>3</sub>CSi, 23.0 (s, C-9), 17.8 (s, (CH<sub>3</sub>)<sub>3</sub>CSi), –4.7, –5.5 (2 s, CH<sub>3</sub>SiCH<sub>3</sub>) ppm; **HRMS** (ESI +): calculated for C<sub>20</sub>H<sub>27</sub>F<sub>6</sub>N<sub>2</sub>O<sub>3</sub>Si<sup>+</sup> [M+H]<sup>+</sup>: 453.1791, found 453.1780; **HRMS** (ESI –):  $m/z$  calculated for C<sub>21</sub>H<sub>27</sub>F<sub>6</sub>N<sub>2</sub>O<sub>3</sub>Si<sup>–</sup> [M+HCOO]<sup>–</sup>: 497.1690, found 497.1705.

**4-((2R)-2-((1R)-1-((tert-butyldimethylsilyloxy)-2,2-trifluoroethyl)-5-oxo-pyrrolidin-1-yl)-2-(trifluoromethyl)benzonitrile (6):** A 5 mL round bottom flask equipped with an efficient magnetic stirring bar was charged with RuCl<sub>3</sub> (5.4 mg, 26  $\mu$ mol) and 10% w/v aqueous NaIO<sub>4</sub> solution (0.25 mL, 12  $\times 10^{-5}$  mol) was added. To the stirred black solution that ensued was added dropwise a solution of **6** (18.5 mg, 40.9  $\mu$ mol) in ethyl acetate (0.9 mL), the flask was sealed, and the mixture was vigorously stirred at ambient temperature for 3 h. Water (1 mL) and ethyl acetate (3 mL) was added and the organic phase was separated. The aqueous layer was extracted with ethyl acetate (2  $\times$  3 mL). To the combined organic layers was added isopropanol (0.5 mL), the mixture was stirred for 1 h, and the black precipitate formed was removed by filtration through a short pad

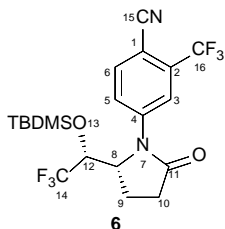

of Celite. The filtrate was washed with brine (2  $\times$  3 mL), dried over Na<sub>2</sub>SO<sub>4</sub>, and concentrated. Flash column chromatography (silica gel, *n*-hexane/EtOAc 9:1 to 8:2) gave pyrrolidone **6** as light brown oil (13.7 mg, 29.4  $\mu$ mol, 71.9% yield).  $R_f$  = 0.52 (silica gel, hexane/EtOAc 1:1);  $[\alpha]_D^{25}$  = +3.3 ( $c$  = 0.95, CHCl<sub>3</sub>); **<sup>1</sup>H NMR** (500 MHz, CDCl<sub>3</sub>):  $\delta$  = 8.12 (dd,  $J$  = 8.7, 2.3 Hz, 1 H, H-5), 8.03 (d,  $J$  = 2.3 Hz, 1 H, H-3), 7.81 (d,  $J$  = 8.6 Hz, 1 H, H-6), 4.66 (t,  $J$  = 7.2 Hz, 1 H, H-8), 4.07 (quint.,  $J$  = 6.3 Hz, 1 H, H-12), 2.76 (ddd,  $J$  = 17.8, 11.4, 9.4, 1 H, H-10), 2.60 (ddd,  $J$  = 17.9, 9.7, 1.9 Hz, 1 H, H-10'), 2.45–2.29 (m, 2 H, H-9 & H-9'), 0.75 (s, 9 H, (CH<sub>3</sub>)<sub>3</sub>CSi), –0.08 & –0.04 (2 s, 6 H, CH<sub>3</sub>SiCH<sub>3</sub>) ppm; **<sup>13</sup>C NMR** (125 MHz, CDCl<sub>3</sub>):  $\delta$  = 174.8 (s, C-11), 143.0 (s, C-4), 135.6 (s, C-6), 133.8 (q,  $J$  = 32.8 Hz, C-2), 124.5 (q,  $J$  = 284.4 Hz, C-14), 123.8 (s, C-5), 122.3 (q,  $J$  = 274.1 Hz, C-16), 118.6 (q,  $J$  = 5.0 Hz, C-3), 115.5 (s, C-15), 105.1 (br d,  $J$  = 2.3 Hz, C-1), 70.7 (q,  $J$  = 29.3 Hz, C-12), 58.7 (s, C-8), 30.7 (s, C-10), 25.3 (s, CH<sub>3</sub>)<sub>3</sub>CSi, 21.3 (s, C-9), 17.9 (s, (CH<sub>3</sub>)<sub>3</sub>CSi), –5.0 & –5.3 (2 s, CH<sub>3</sub>SiCH<sub>3</sub>) ppm; **HRMS** (ESI –):  $m/z$  calculated for C<sub>21</sub>H<sub>25</sub>F<sub>6</sub>N<sub>2</sub>O<sub>4</sub>Si<sup>–</sup> [M+HCOO]<sup>–</sup>: 511.1482, found 511.1488.

**4-((5R)-2-oxo-5-((1R)-2,2,2-trifluoro-1-hydroxyethyl)pyrrolidin-1-yl)-2-(trifluoromethyl)benzonitrile (7):**<sup>9</sup> A solution of TBS-protected pyrrolidone **6** (12.4 mg, 26.6  $\mu$ mol) in THF (0.5 mL) was treated at ambient temperature and under an atmosphere of argon with 1.0 M solution of TBAF in THF (0.04 mL, 4  $\times 10^{-5}$  mol). After 0.5 h, half saturated aqueous NH<sub>4</sub>Cl solution (0.5 mL) was added and the mixture was

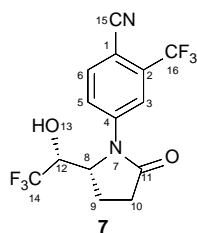

extracted with ethyl acetate (3 × 5 mL). The combined organic layers were washed with brine (5 mL), dried over Na<sub>2</sub>SO<sub>4</sub>, and concentrated. Flash column chromatography (silica gel, CH<sub>2</sub>Cl<sub>2</sub>/EtOAc 9:1) gave pyrrolidone **7** as colorless solid (8.8 mg, 25 μmol, 94% yield). *R<sub>f</sub>* = 0.26 (silica gel, CH<sub>2</sub>Cl<sub>2</sub>/EtOAc 8:2); [α]<sub>D</sub><sup>25</sup> = -3.2 (*c* = 0.99, MeOH); <sup>1</sup>H NMR (500 MHz, CD<sub>3</sub>OD): δ = 8.19 (s, 1 H, H-3), 7.97–7.93 (m, 2 H, H-5 & H-6), 4.92 (ddt, *J* = 6.8, 5.2, 1.7 Hz, 1 H, H-8), 4.19 (qd, *J* = 7.5, 5.2 Hz, 1 H, H-12), 2.89–2.79 (m, 1 H, H-10), 2.54–2.45 (m, 2 H, H-10' & H-9), 2.20 (td, *J* = 10.4, 2.2 Hz, 1 H, H-9') ppm; <sup>13</sup>C NMR (125 MHz, CD<sub>3</sub>OD): δ = 177.7 (s, C-11), 145.0 (s, C-4), 136.6 (s, C-6), 133.8 (q, *J* = 32.6 Hz, C-2), 127.6 (s, C-5), 126.1 (q, *J* = 282.9 Hz, C-14), 123.9 (q, *J* = 273.0 Hz, C-16), 122.6 (q, *J* = 5.1 Hz, C-3), 116.5 (s, C-15), 106.2 (br d, *J* = 2.0 Hz, C-1), 72.3 (q, *J* = 29.5 Hz, C-12), 60.1 (s, C-8), 31.8 (s, C-10), 23.4 (s, C-9) ppm; HRMS (ESI -): *m/z* calculated for C<sub>15</sub>H<sub>11</sub>F<sub>6</sub>N<sub>2</sub>O<sub>4</sub><sup>-</sup> [M+HCOO]<sup>-</sup>: 397.0618, found 397.0624.

**(4*R*,5*R*)-4-[[4-cyano-3-(trifluoromethyl)phenyl]amino]-6,6,6-trifluoro-5-hydroxyhexanoic acid (4):** To a

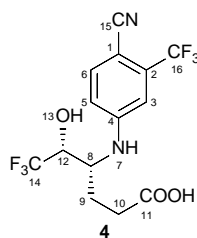

stirred solution of pyrrolidone **5** (7.5 mg, 21 μmol) in THF/MeOH/H<sub>2</sub>O 8:1:4 (0.4 mL) was added at 0 °C LiOH·H<sub>2</sub>O (11.0 mg, 262 μmol). The mixture was allowed to reach ambient temperature and it was then stirred at 30 °C for 4 h. The reaction was quenched at 0 °C with the dropwise addition of AcOH/H<sub>2</sub>O 1:1 (1 mL). The mixture was diluted with EtOAc (5 mL) and washed with half saturated brine (2 × 5 mL). The aqueous washings were extracted with EtOAc (3 × 5 mL) and the combined organic layers were dried over Na<sub>2</sub>SO<sub>4</sub>, and concentrated under reduced pressure. Benzene (3 × 5 mL) was added to the residue and volatiles were removed under reduced pressure.

The light-yellow solid thus obtained was dissolved in 2% MeOH in dichloromethane (2 mL), silica gel (0.1 g) was added, volatiles were removed under reduced pressure, and the residue was loaded on top of a chromatography column (silica gel, CH<sub>2</sub>Cl<sub>2</sub>/EtOAc 8:2). Elution with CH<sub>2</sub>Cl<sub>2</sub>/EtOAc 8:2 to CH<sub>2</sub>Cl<sub>2</sub>/EtOAc/AcOH 80:20:1 provided carboxylic acid **4** as colorless glass (7.1 mg, 19 μmol, 90% yield). *R<sub>f</sub>* = 0.34 (silica gel, CH<sub>2</sub>Cl<sub>2</sub>/EtOAc/AcOH 80:20:1); [α]<sub>D</sub><sup>25</sup> = +12 (*c* = 0.14, MeOH); <sup>1</sup>H NMR (500 MHz, CD<sub>3</sub>OD): δ = 7.58 (d, *J* = 8.7 Hz, 1 H, H-6), 7.08 (d, *J* = 2.5 Hz, 1 H, H-3), 6.89 (dd, *J* = 8.7, 2.5 Hz, 1 H, H-5), 4.10–4.04 (m, 2 H, H-8 & H-12), 2.40 (t, *J* = 7.2 Hz, 2 H, H-10 & H-10'), 1.99 (q, *J* = 7.2 Hz, 2 H, H-9 & H-9') ppm; <sup>13</sup>C NMR (125 MHz, CD<sub>3</sub>OD): δ = 176.8 (s, C-11), 153.4 (s, C-4), 137.4 (s, C-6), 134.9 (q, *J* = 31.6 Hz, C-2), 126.4 (q, *J* = 282.9 Hz, C-14), 124.3 (q, *J* = 272.9 Hz, C-16), 118.3 (s, C-15), 114.8 (br s, C-5), 111.5 (br s, C-3), 94.5 (br d, *J* = 2.4 Hz, C-1), 71.3 (q, *J* = 29.7 Hz, C-12), 52.0 (s, C-8), 30.9 (s, C-10), 28.7 (s, C-9) ppm; HRMS (ESI -): *m/z* calculated for C<sub>14</sub>H<sub>11</sub>F<sub>6</sub>N<sub>2</sub>O<sub>3</sub><sup>-</sup> [M-H]<sup>-</sup>: 369.0668, found 369.0671.

**Table S1.**  $^1\text{H}$  NMR (600 MHz, CD<sub>3</sub>OD) data reported<sup>7</sup> for compound **3** vs.  $^1\text{H}$  NMR (500 MHz, CD<sub>3</sub>OD) signals observed for compound **4**.

| Position | Compound <b>3</b><br>$\delta_{\text{H}}^{\ddagger, \S}$ | Position | Compound <b>4 (this work)</b><br>$\delta_{\text{H}}$ (mult., $J$ in Hz) | Difference<br>( $\delta_4 - \delta_3$ ) |
|----------|---------------------------------------------------------|----------|-------------------------------------------------------------------------|-----------------------------------------|
| 1        | –                                                       | 1        | –                                                                       | –                                       |
| 2        | –                                                       | 2        | –                                                                       | –                                       |
| 3        | 7.07                                                    | 3        | 7.08 (d, $J = 2.5$ Hz)                                                  | 0.01                                    |
| 4        | –                                                       | 4        | –                                                                       | –                                       |
| 5        | 6.89                                                    | 5        | 6.89 (dd, $J = 8.7, 2.5$ Hz)                                            | 0.00                                    |
| 6        | 7.56                                                    | 6        | 7.58 (d, $J = 8.7$ Hz)                                                  | 0.02                                    |
| 7        | –                                                       | 7        | –                                                                       | –                                       |
| 8        | –                                                       | 11       | –                                                                       | –                                       |
| 9        | 2.24                                                    | 10       | 2.40 (t, $J = 7.2$ Hz)                                                  | 0.16 <sup>\S\S</sup>                    |
| 10       | 1.94                                                    | 9        | 1.99 (q, $J = 7.2$ Hz)                                                  | 0.05                                    |
| 11       | 4.00                                                    | 8        | 4.10–4.04 (m)                                                           |                                         |
| 12       | 4.07                                                    | 12       | 4.10–4.04 (m)                                                           |                                         |
| 13       | –                                                       | 13       | –                                                                       | –                                       |
| 14       | –                                                       | 14       | –                                                                       | –                                       |
| 15       | –                                                       | 15       | –                                                                       | –                                       |
| 16       | –                                                       | 16       | –                                                                       | –                                       |

‡ No information regarding signal multiplicities / coupling constants was reported.

§ The actual spectrum was not reported.

\S\S A difference of  $-0.02$  ppm is calculated assuming that the reported chemical shift of 2.24 ppm was actually 2.42 ppm.

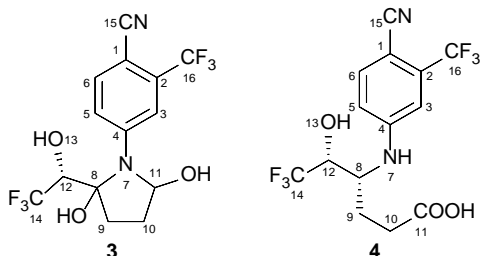

## Ib. LC-HRMS Analysis

A Dionex UHPLC system (Thermo Scientific, Bremen, Germany) was used for the chromatographic separation. The system consisted of a vacuum degasser, a high-pressure binary pump, an autosampler with a temperature-controlled sample tray set at 7 °C and a column oven set at 30 °C. Chromatographic separation was performed at 30 °C using a Zorbax Eclipse Plus C18 column (100 × 2.1 mm i.d., 1.8 μm particle size; Agilent Technologies). The mobile phase consisted of 5 mM ammonium formate in 0.02% formic acid (solvent A) and a mixture of acetonitrile/water (90:10 v/v) containing 5 mM ammonium formate and 0.01% formic acid (solvent B). A gradient elution program was employed at a constant flow rate of 0.2 mL min<sup>-1</sup> with solvent B starting at 5% for 3 min, increasing to 30% in 4 min, increasing to 90% in 11 min and then, set back to 5% in 11.5 min. Post-run equilibrium time was 3.5 min. The injection volume was 5 μL.

The mass spectrometer was a QExactive plus benchtop Orbitrap-based mass spectrometer (ThermoScientific, Bremen, Germany) operated in the negative polarity mode and equipped with a heated electro-spray ionization (HESI) source. Source parameters were: sheath gas (nitrogen) flow rate, auxiliary gas (nitrogen) flow rate and sweep gas flow rate: 40, 10 and 1 arbitrary units respectively, capillary temperature: 300 °C, heater temperature: 30 °C, spray voltage: +4.0 kV (positive polarity). The instrument operated in FS mode from *m/z* 100–1000 at 17,500 resolving power and duty cycle of 100 ms and in MS/MS mode from *m/z* 100–1000 at 17,500 resolving power and duty cycle of 62 ms (product ion mode). The automatic gain control (AGC) was set to 106. The mass calibration of the Orbitrap instrument was evaluated in both positive and negative modes daily and external calibration was performed prior to use following the manufacturer's calibration protocol.

## II. References

- 1 D. B. G. Williams and M. Lawton, *J. Org. Chem.*, 2010, **75**, 8351–8354.
- 2 M. C. Pirrung, *The Synthetic Organic Chemist's Companion*, 2006.
- 3 W. C. Still, M. Kahn and A. Mitra, *J. Org. Chem.*, 1978, **43**, 2923–2925.
- 4 H. E. Gottlieb, V. Kotlyar and A. Nudelman, *J. Org. Chem.*, 1997, **62**, 7512–7515.
- 5 G. R. Fulmer, A. J. M. Miller, N. H. Sherden, H. E. Gottlieb, A. Nudelman, B. M. Stoltz, J. E. Bercaw and K. I. Goldberg, *Organometallics*, 2010, **29**, 2176–2179.
- 6 L. Zhi (Ligand Pharmaceuticals, Inc.), *World Intellectual Property Organization*, 2009, WO2009082437A2.
- 7 M. Thevis, A. Lagojda, D. Kuehne, A. Thomas, J. Dib, A. Hansson, M. Hedeland, U. Bondesson, T. Wigger, U. Karst and W. Schänzer, *Rapid Commun. Mass Spectrom.*, 2015, **29**, 991–999.
- 8 L. Geldof, O. J. Pozo, L. Lootens, W. Morthier, P. Van Eenoo and K. Deventer, *Drug Test. Anal.*, 2017, **9**, 168–178.
- 9 C. P. Miller (Radius Health, Inc.), *World Intellectual Property Organization*, 2012, WO2012047617A1.

### III. NMR Spectra of Compounds

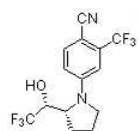

**LGD-4033**  
<sup>1</sup>H NMR spectrum  
(CD<sub>3</sub>OD, 500 MHz)

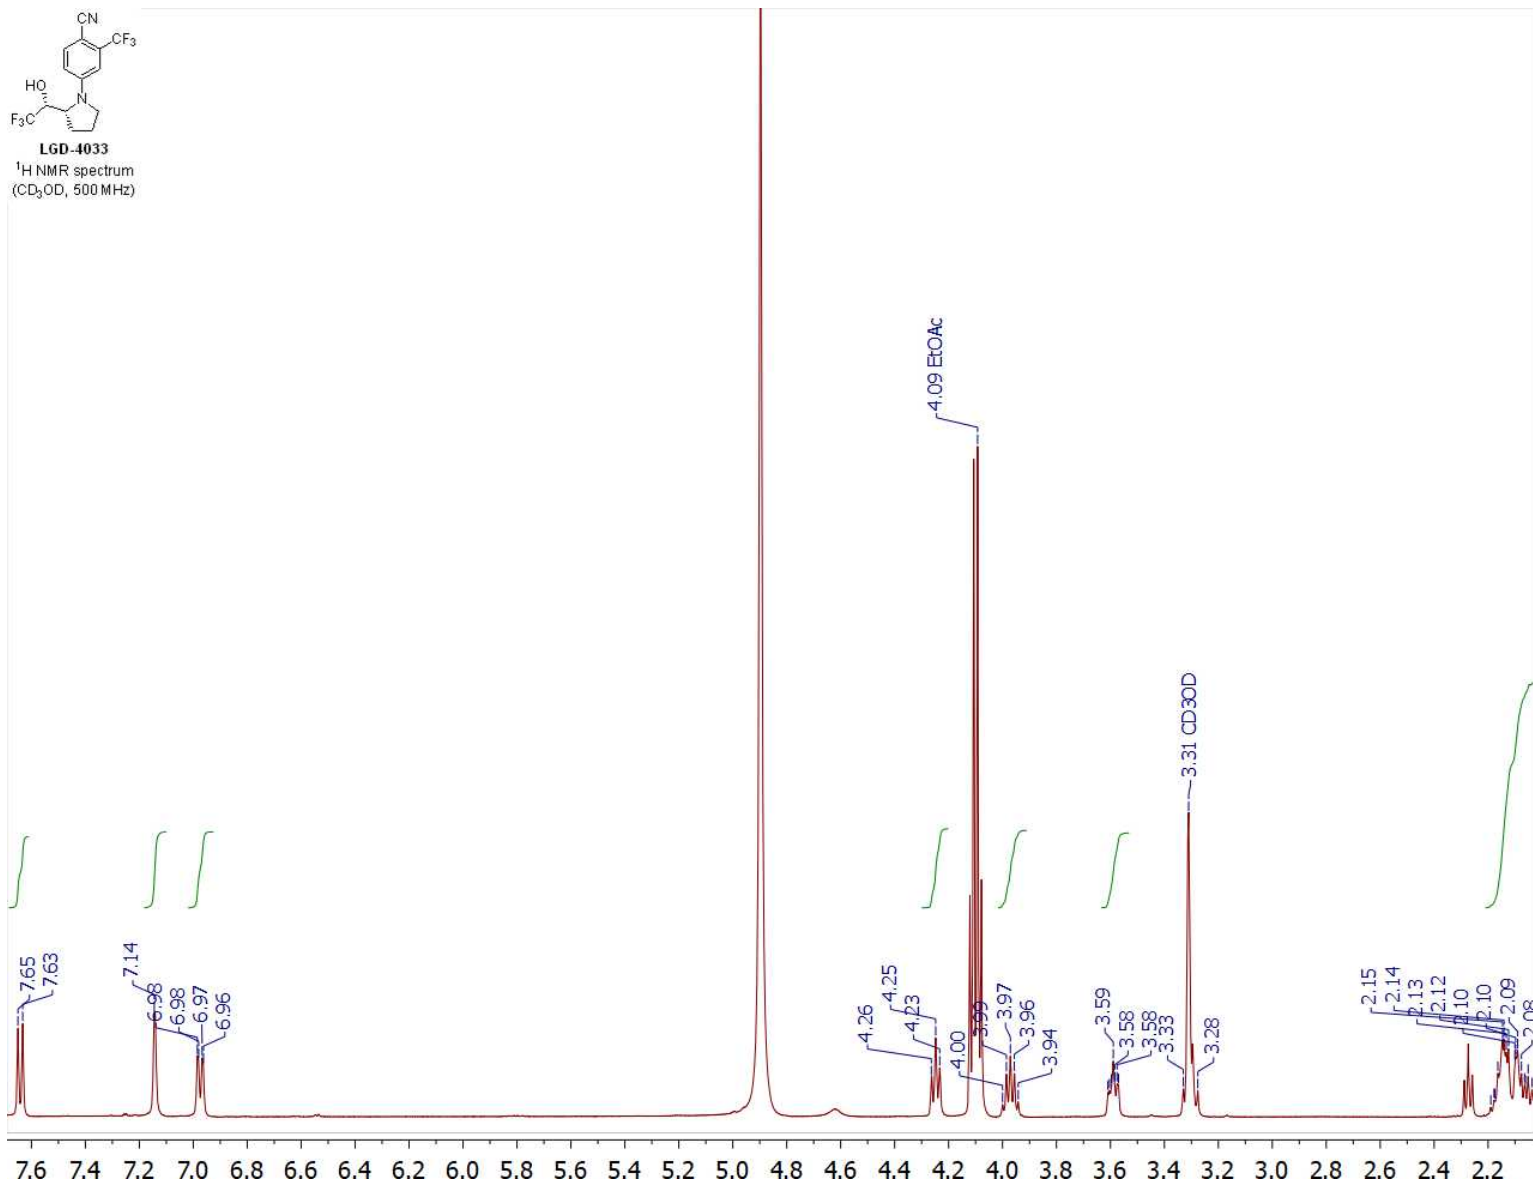



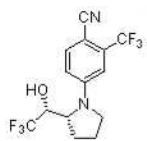

**LGD-4033**

<sup>1</sup>H NMR spectrum  
(CDCl<sub>3</sub>, 250 MHz)

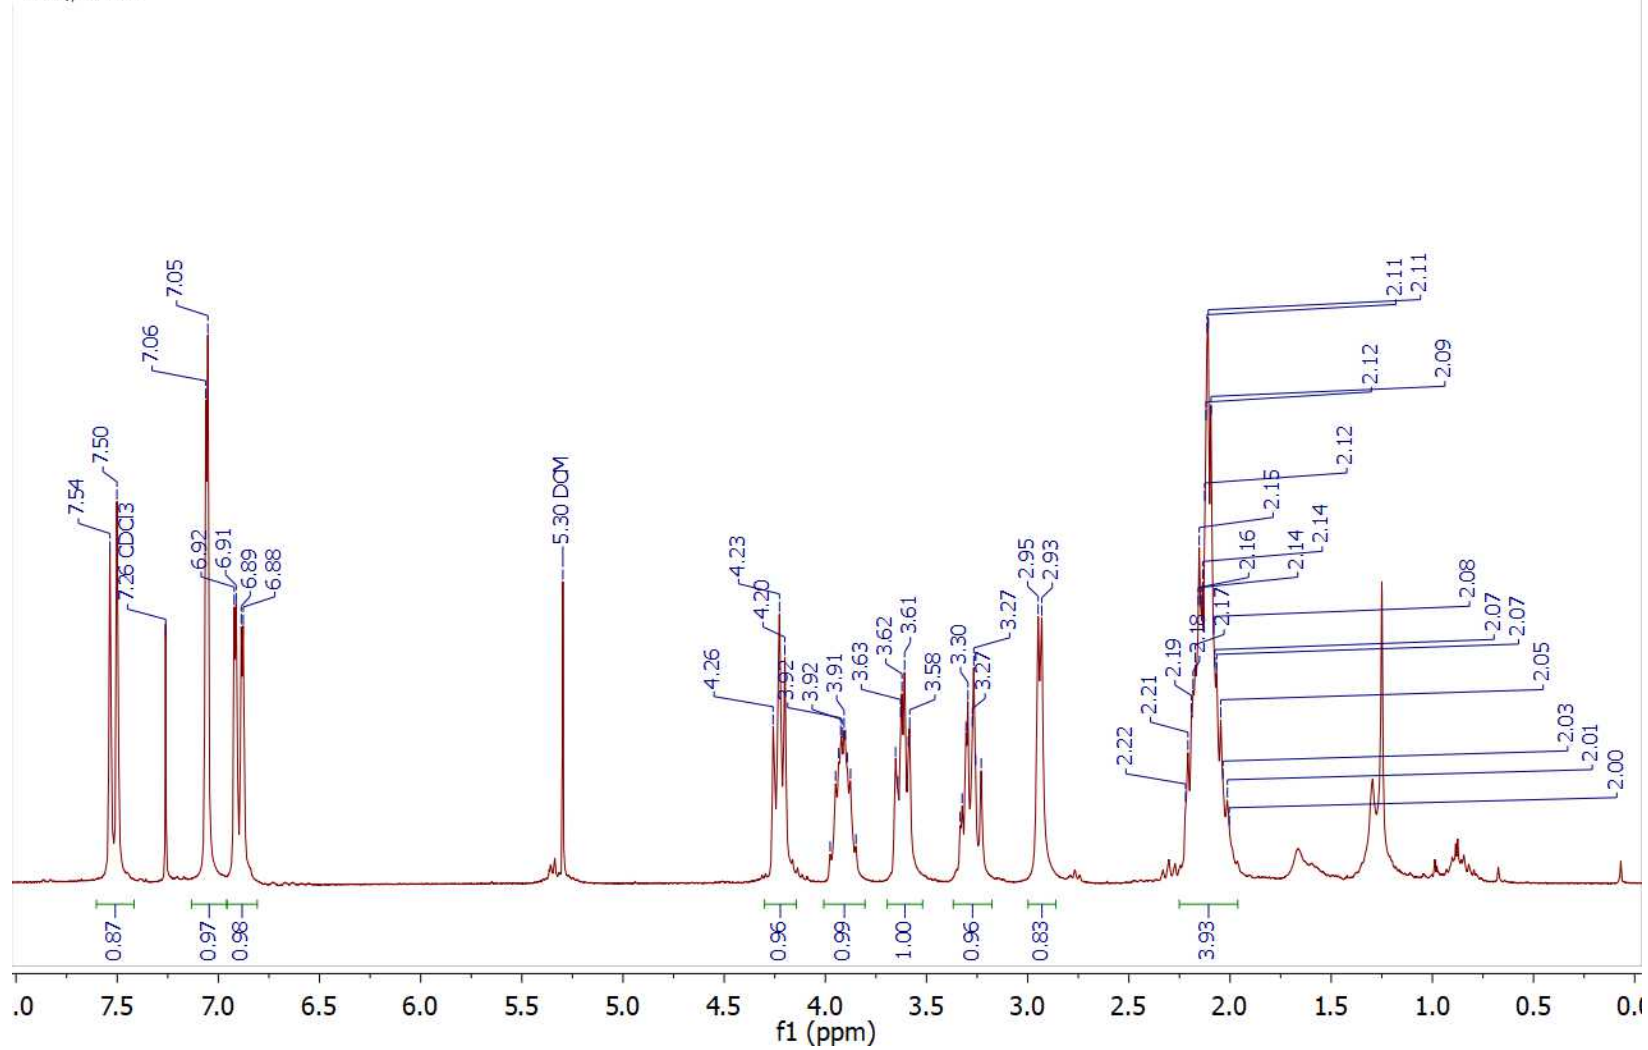

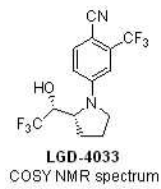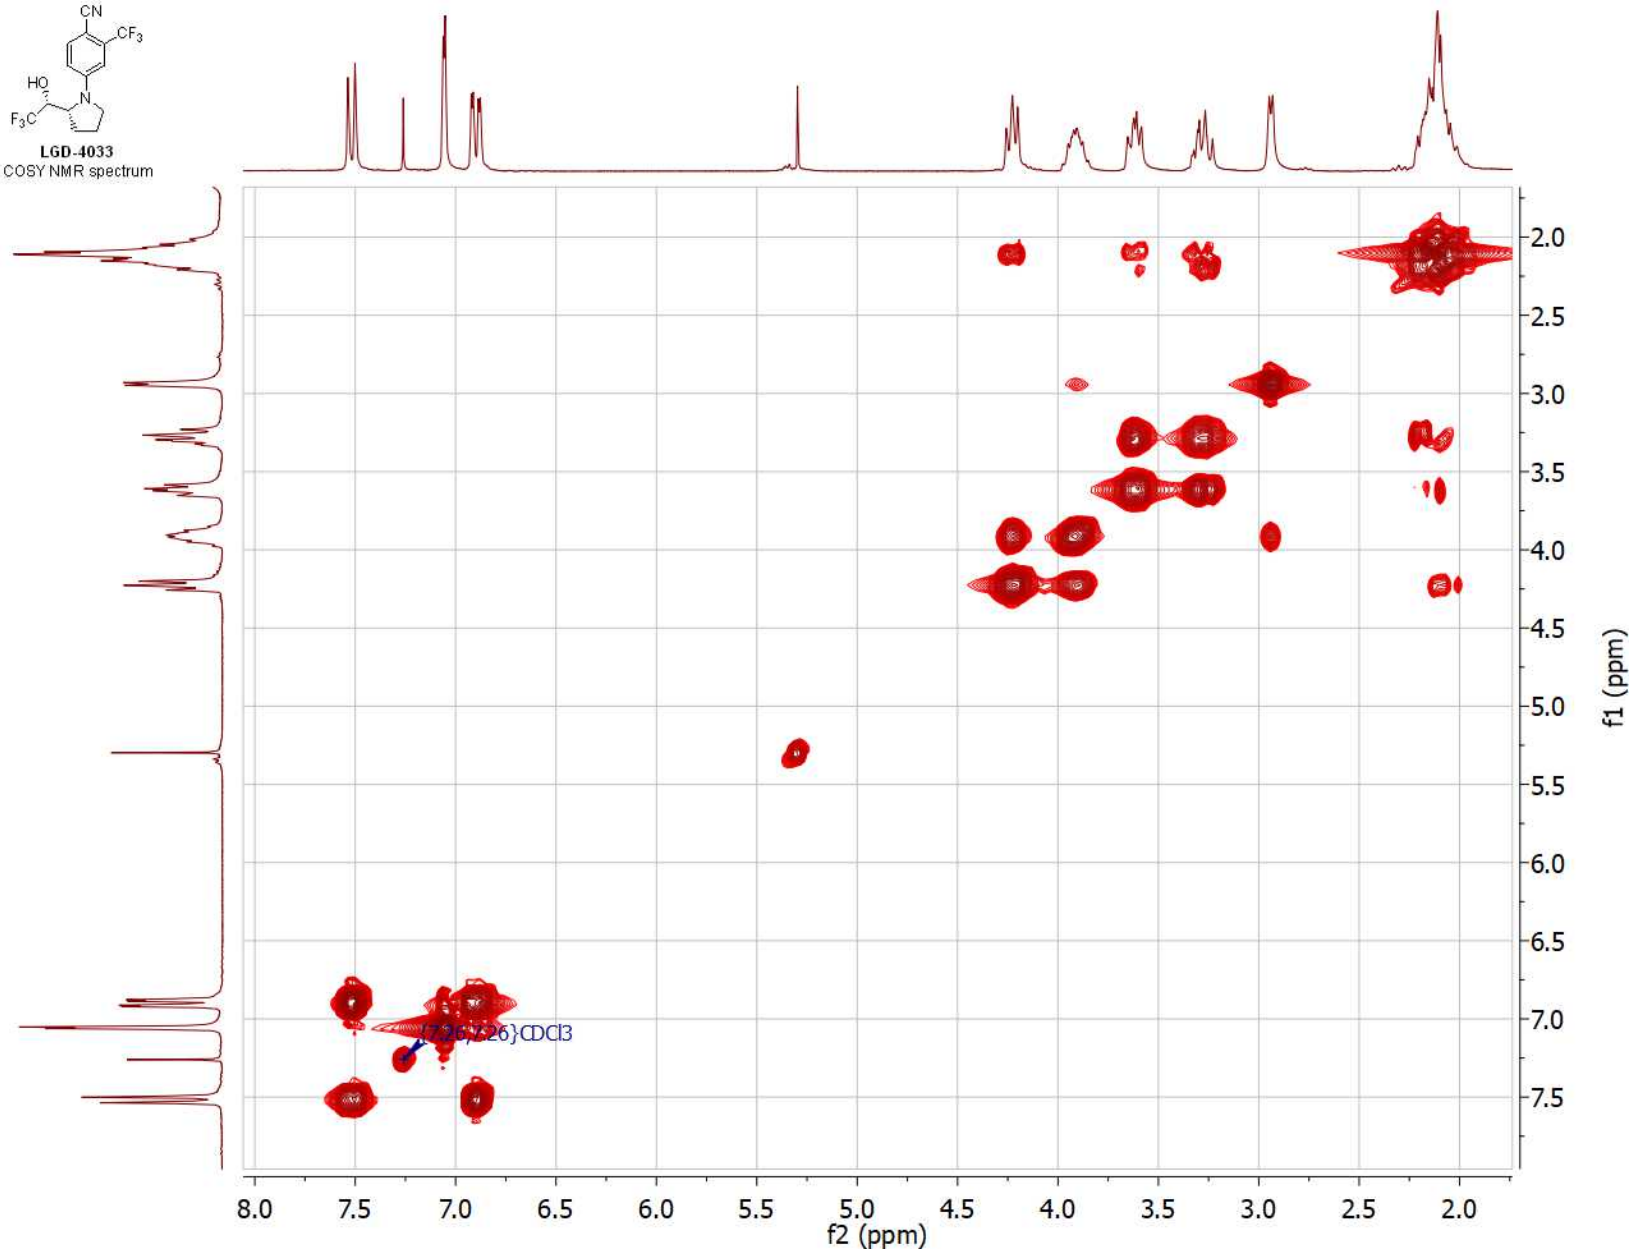

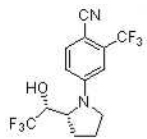

**LGD-4033**

<sup>13</sup>C NMR spectrum  
(CDCl<sub>3</sub>, 62.5 MHz)

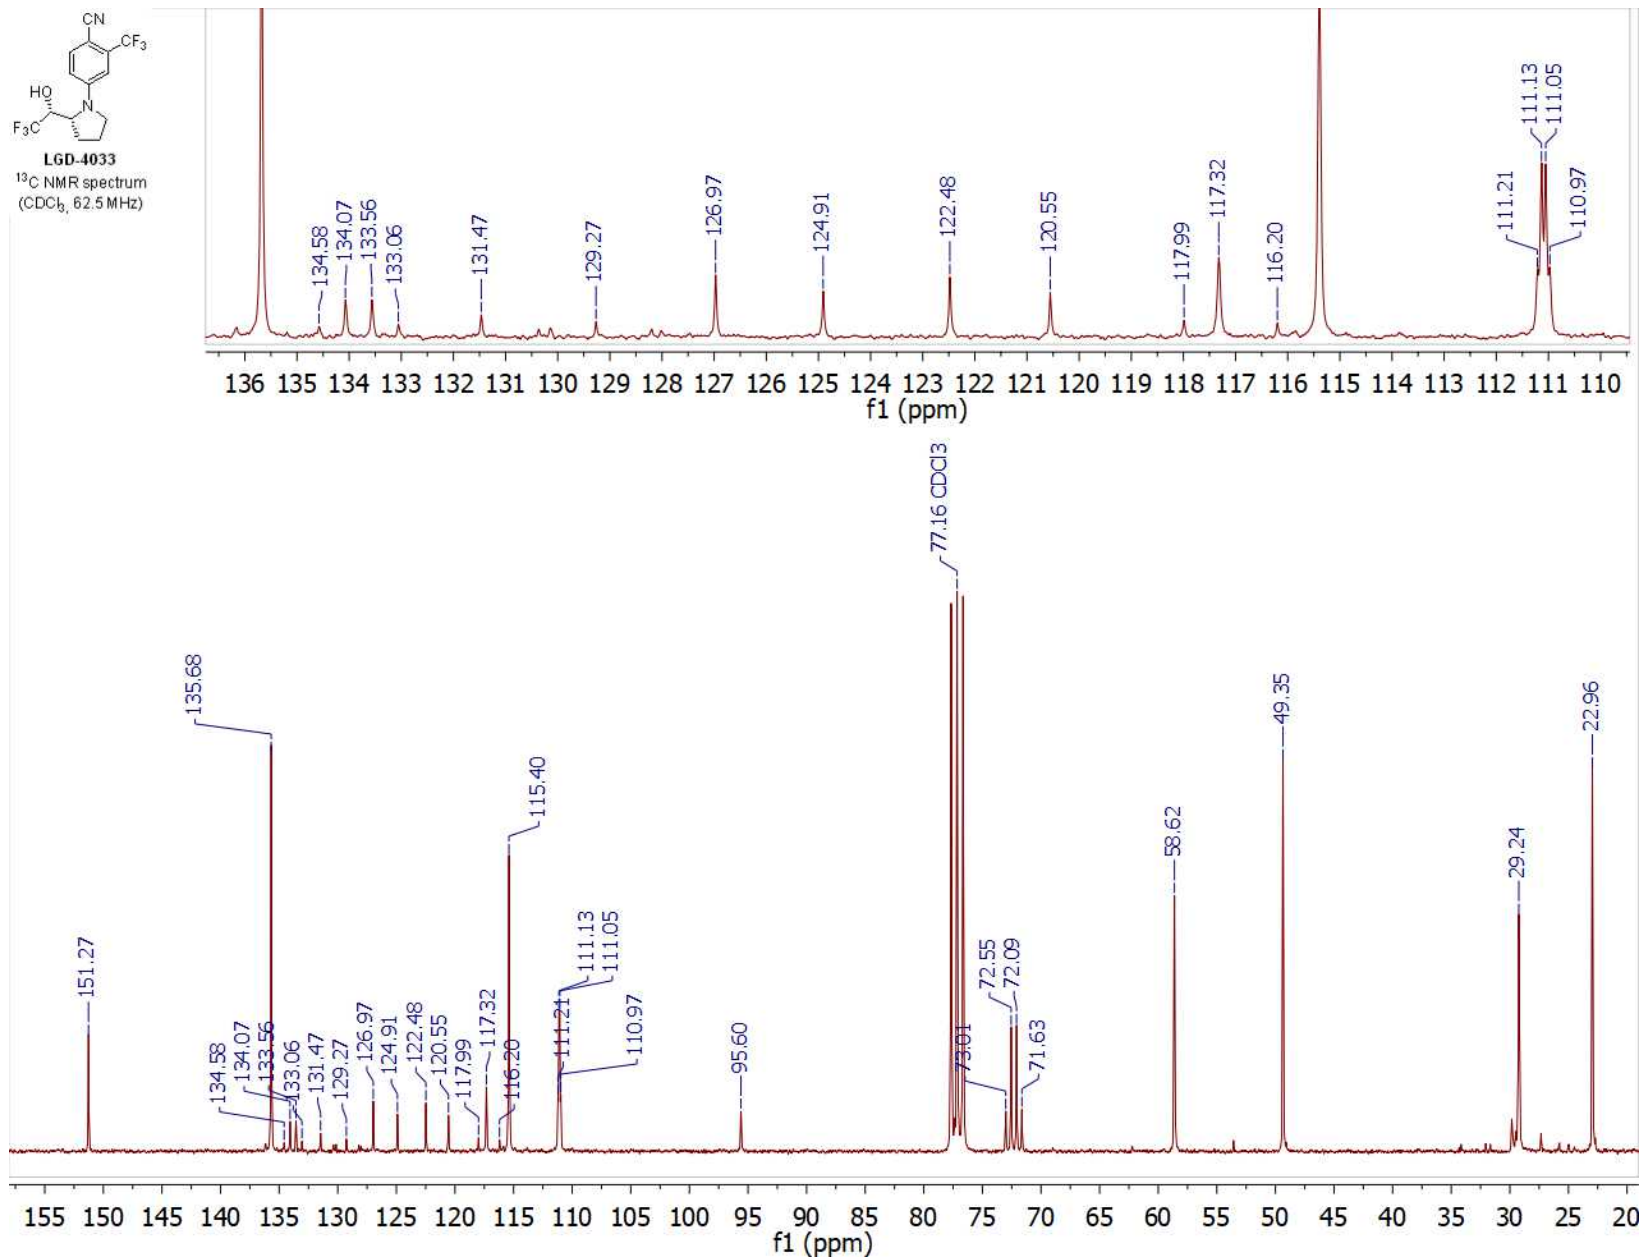

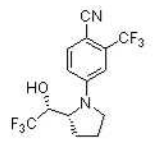

**LGD-4033**  
HSQC NMR spectrum

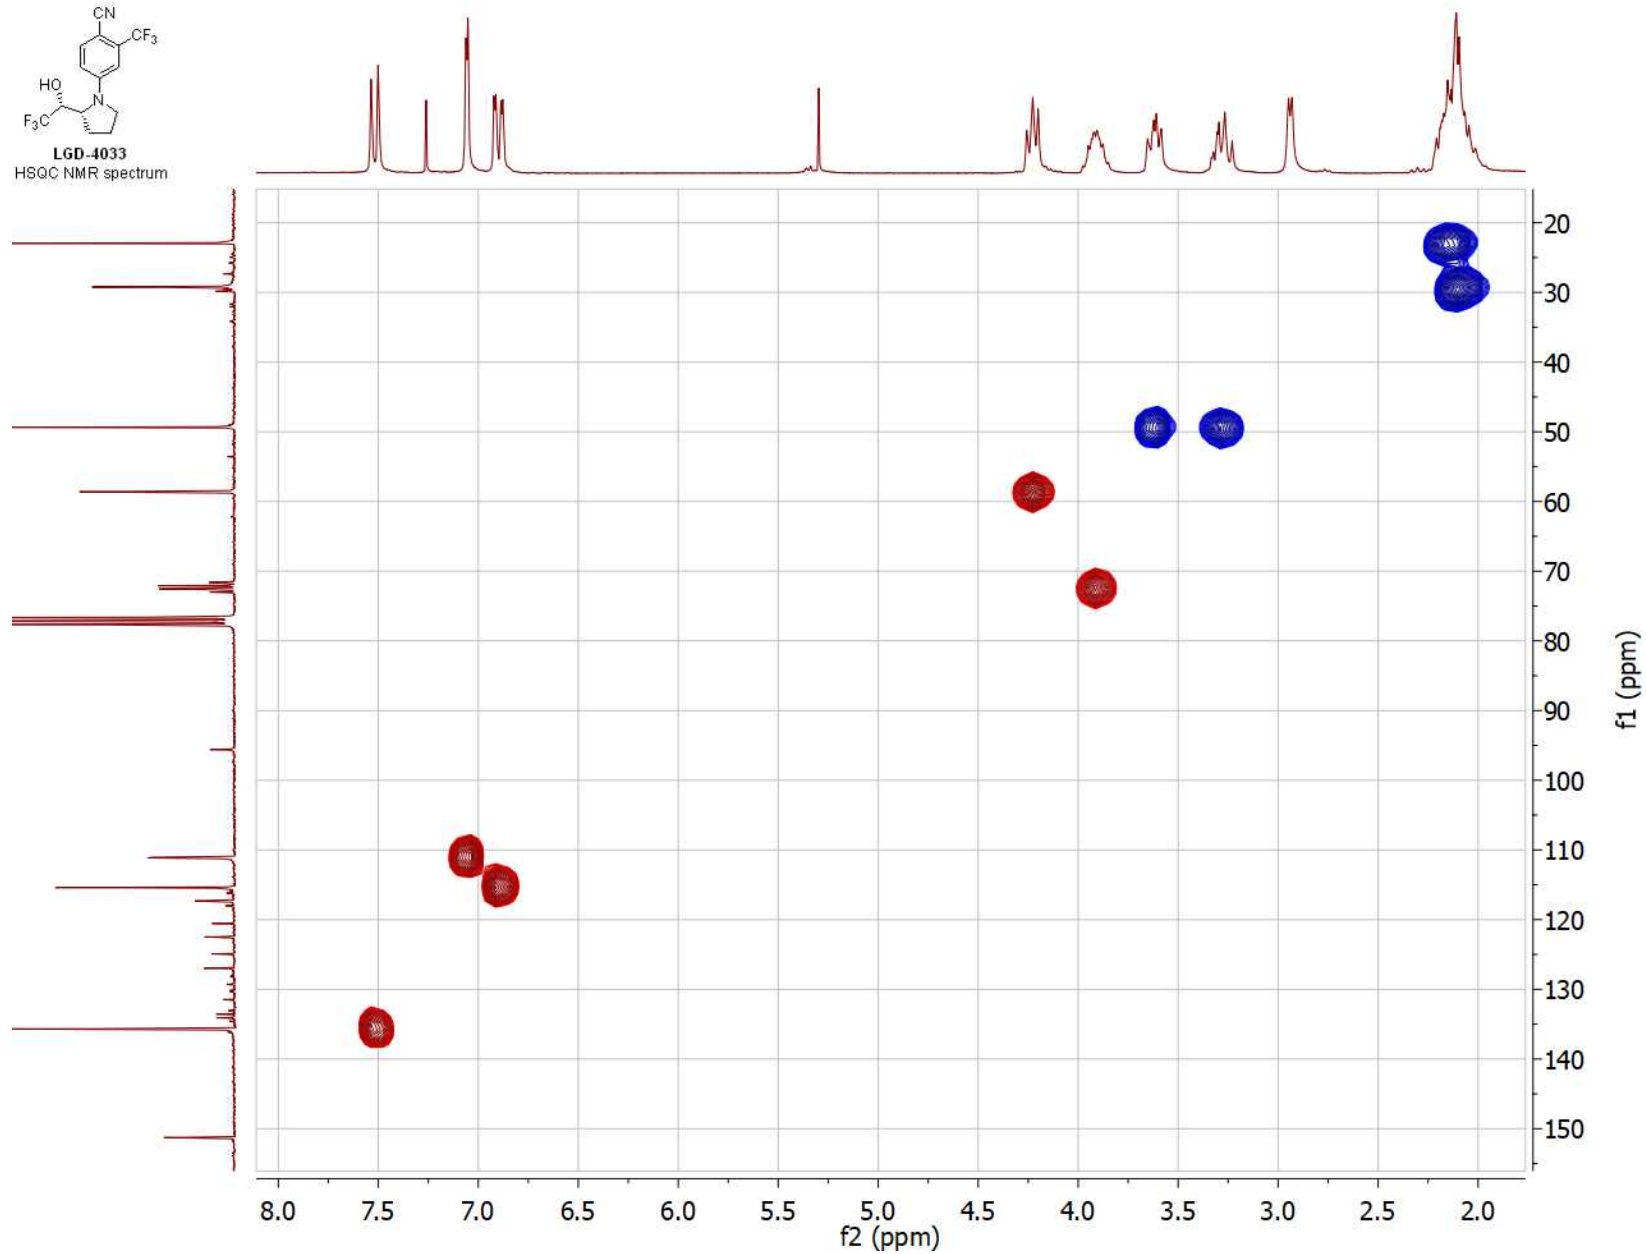

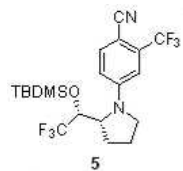

<sup>1</sup>H NMR spectrum  
(CDCl<sub>3</sub>, 250 MHz)

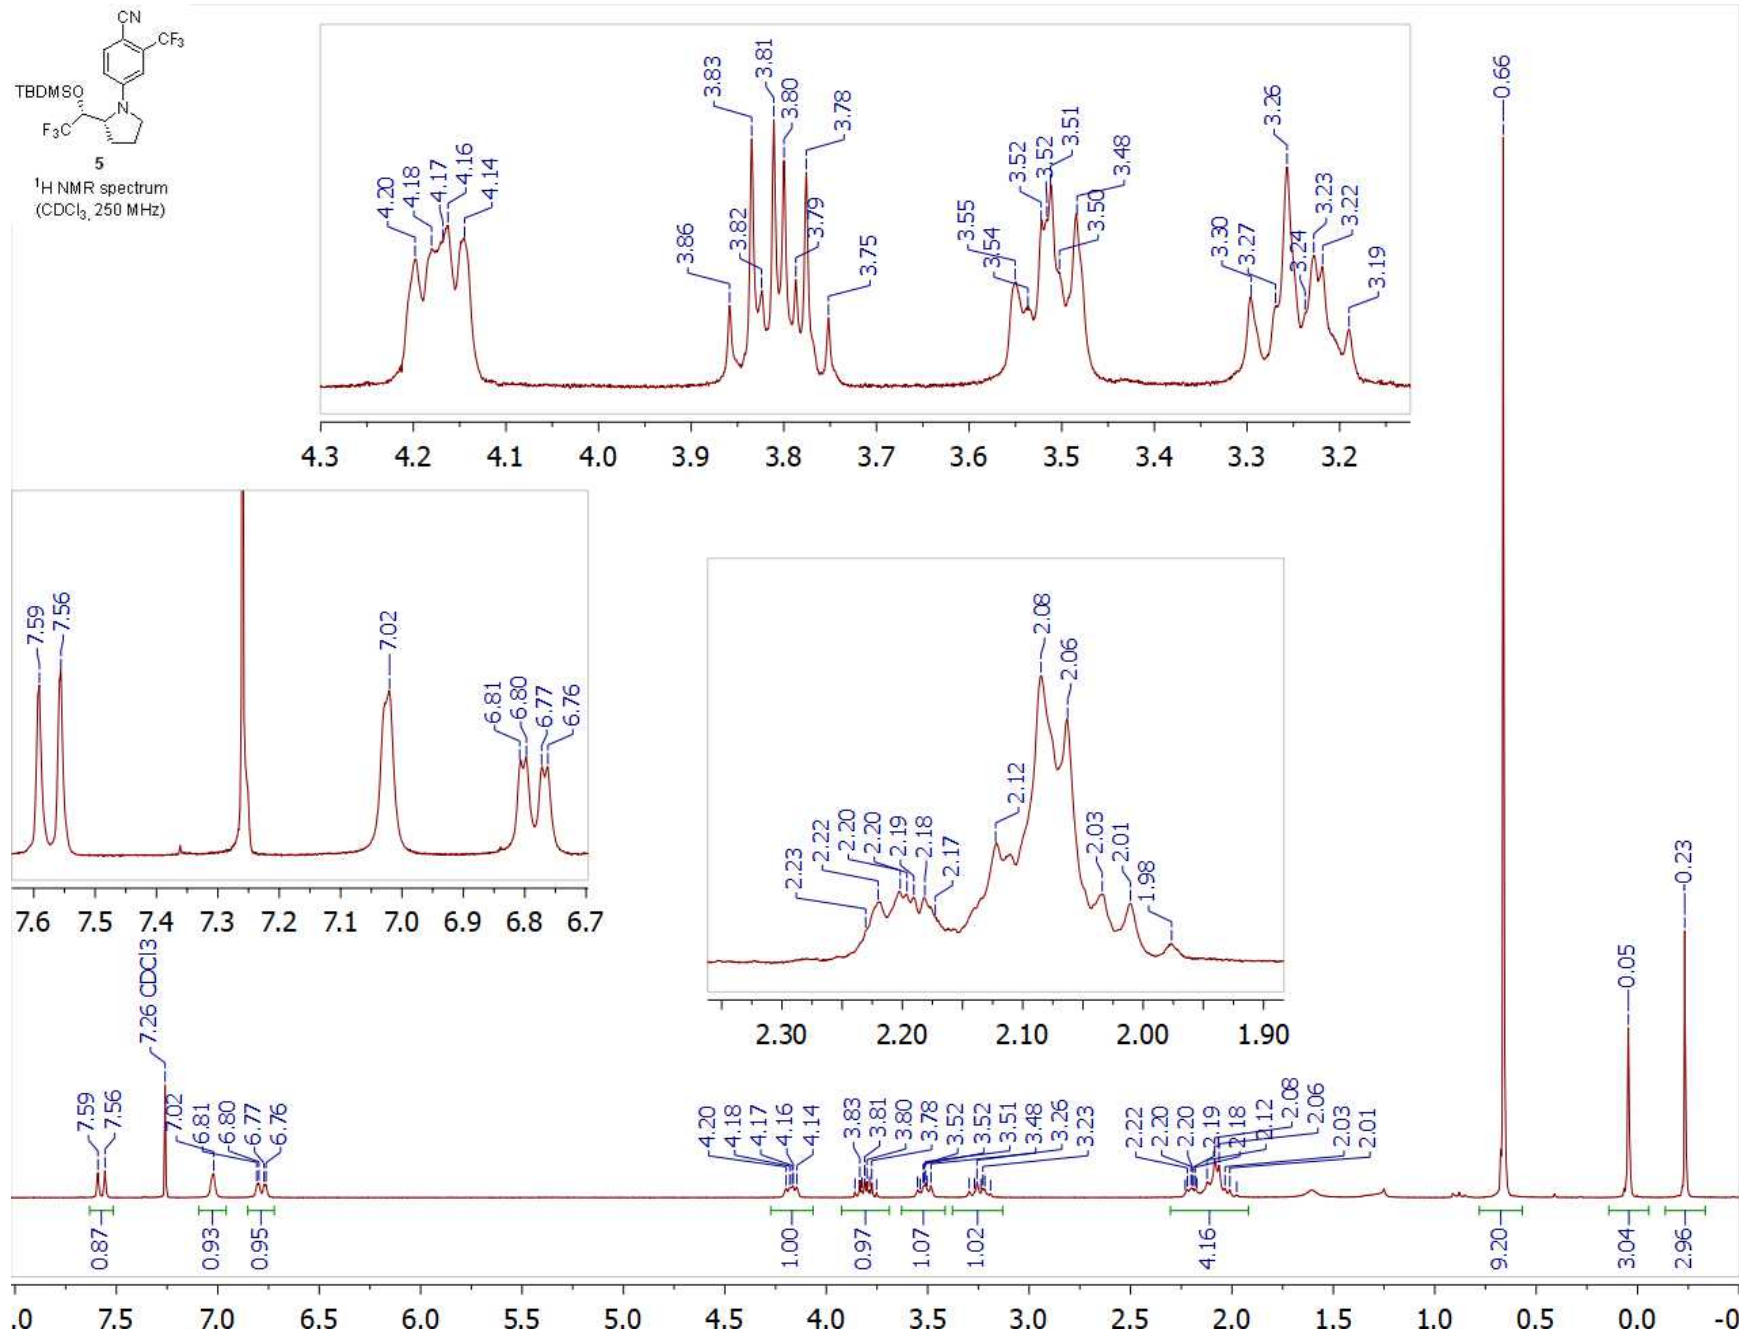

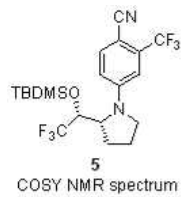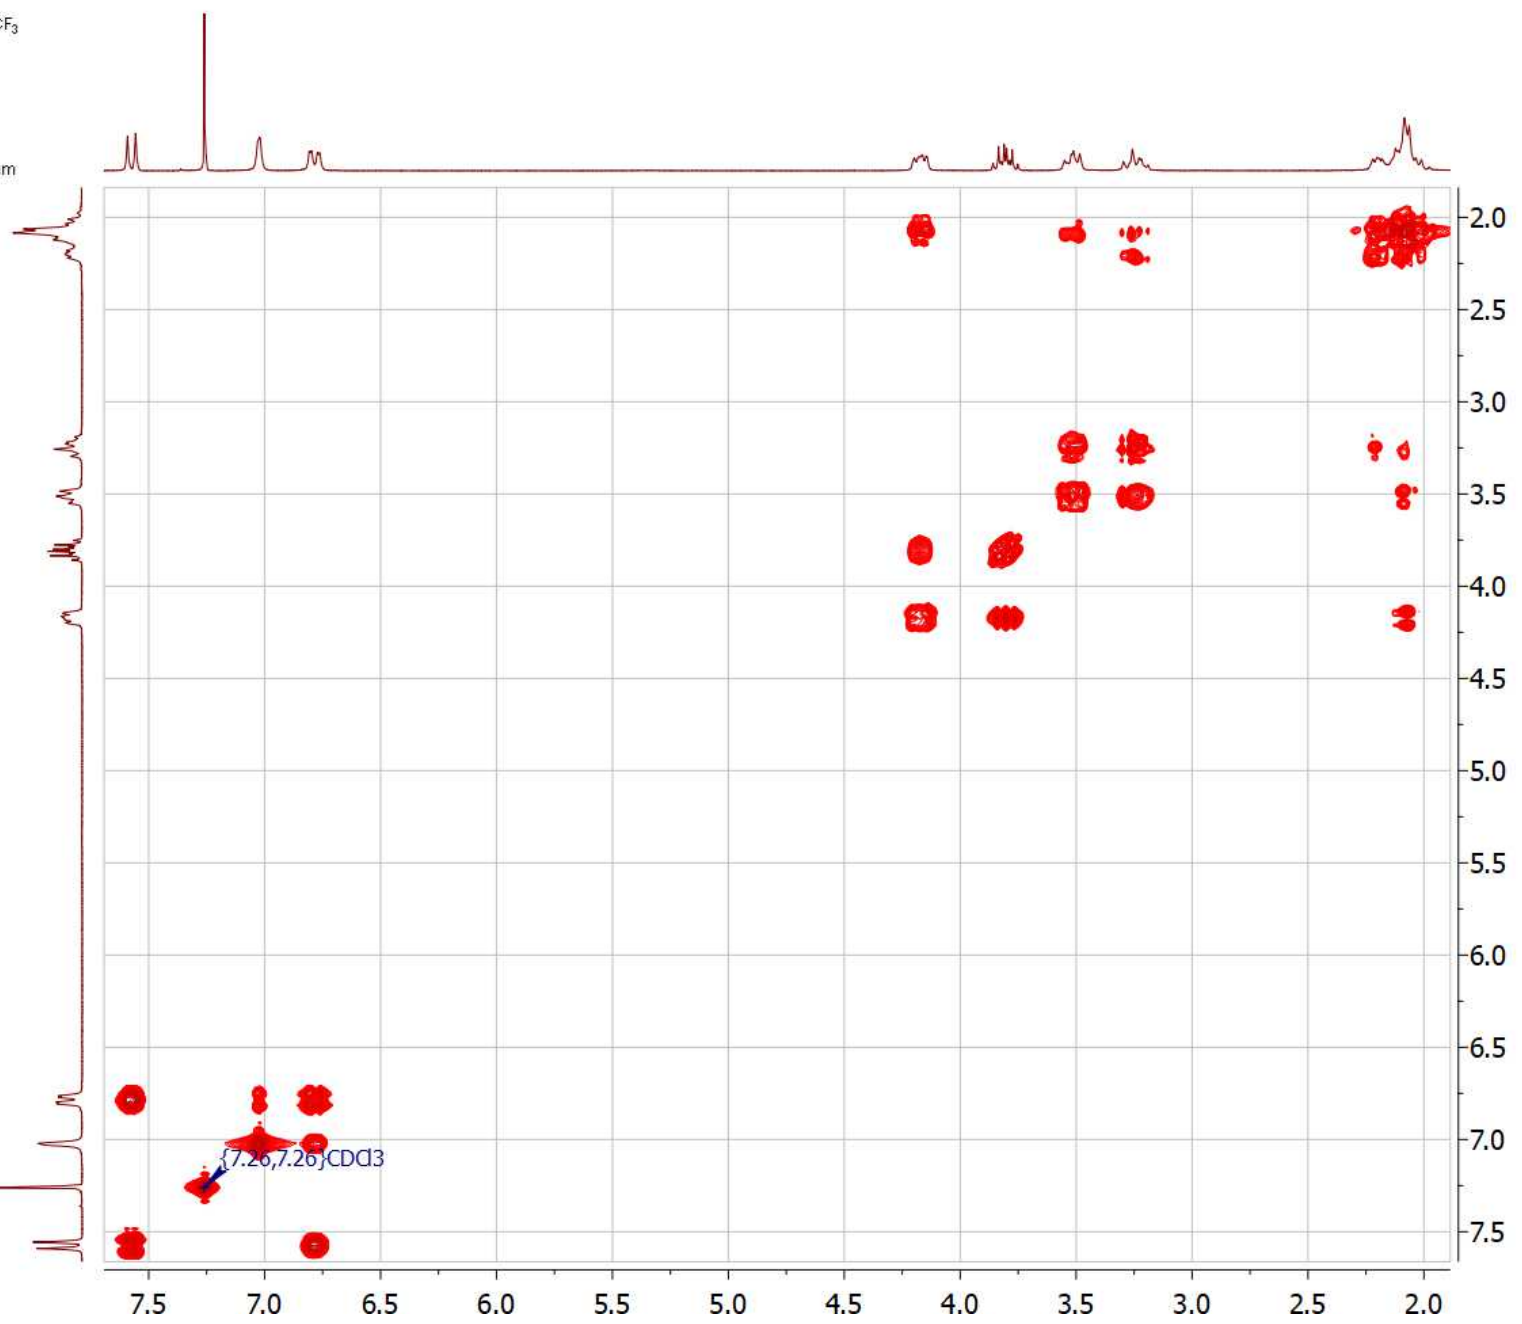

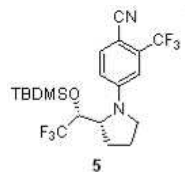

$^{13}\text{C}$  NMR spectrum  
( $\text{CDCl}_3$ , 62.5 MHz)

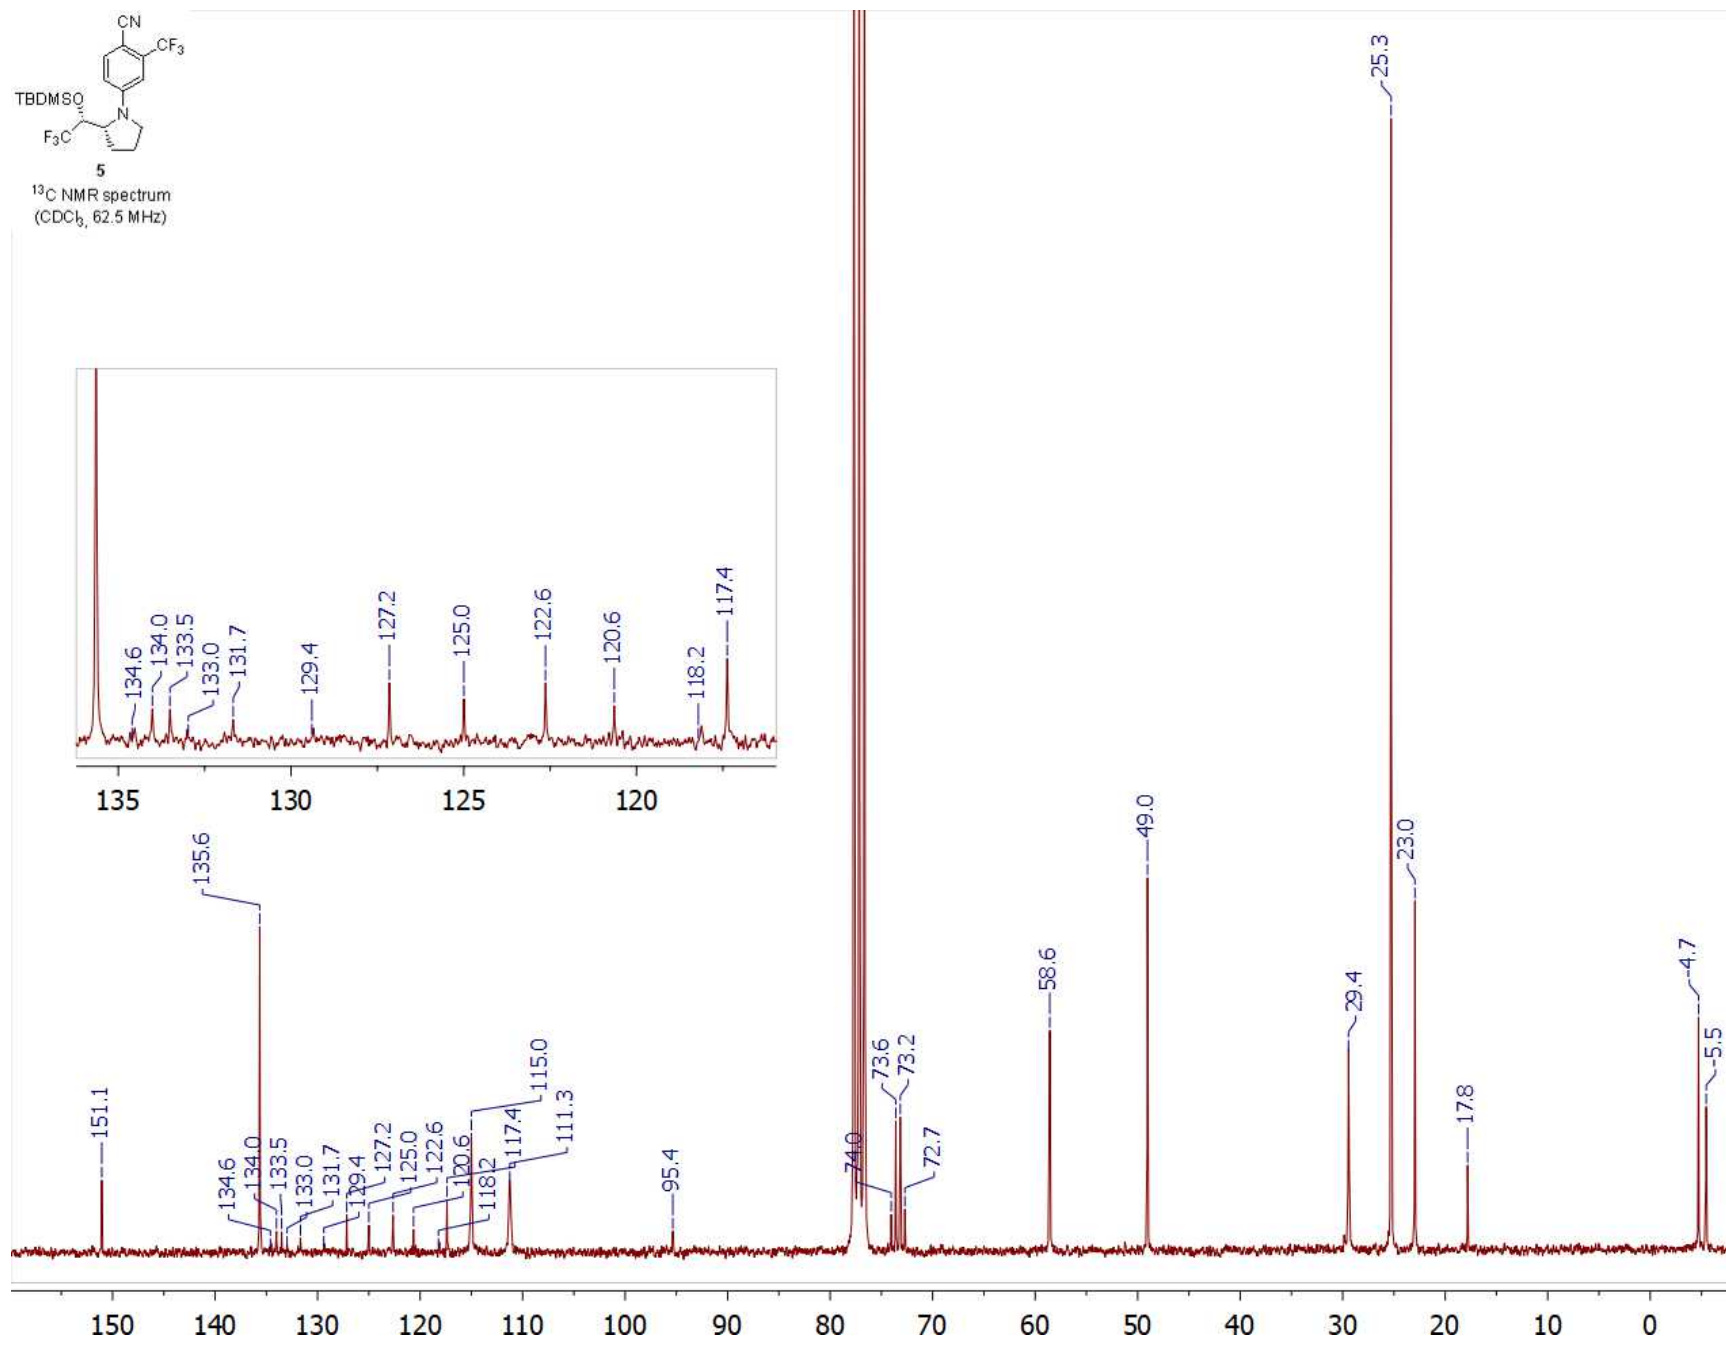



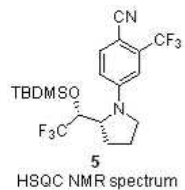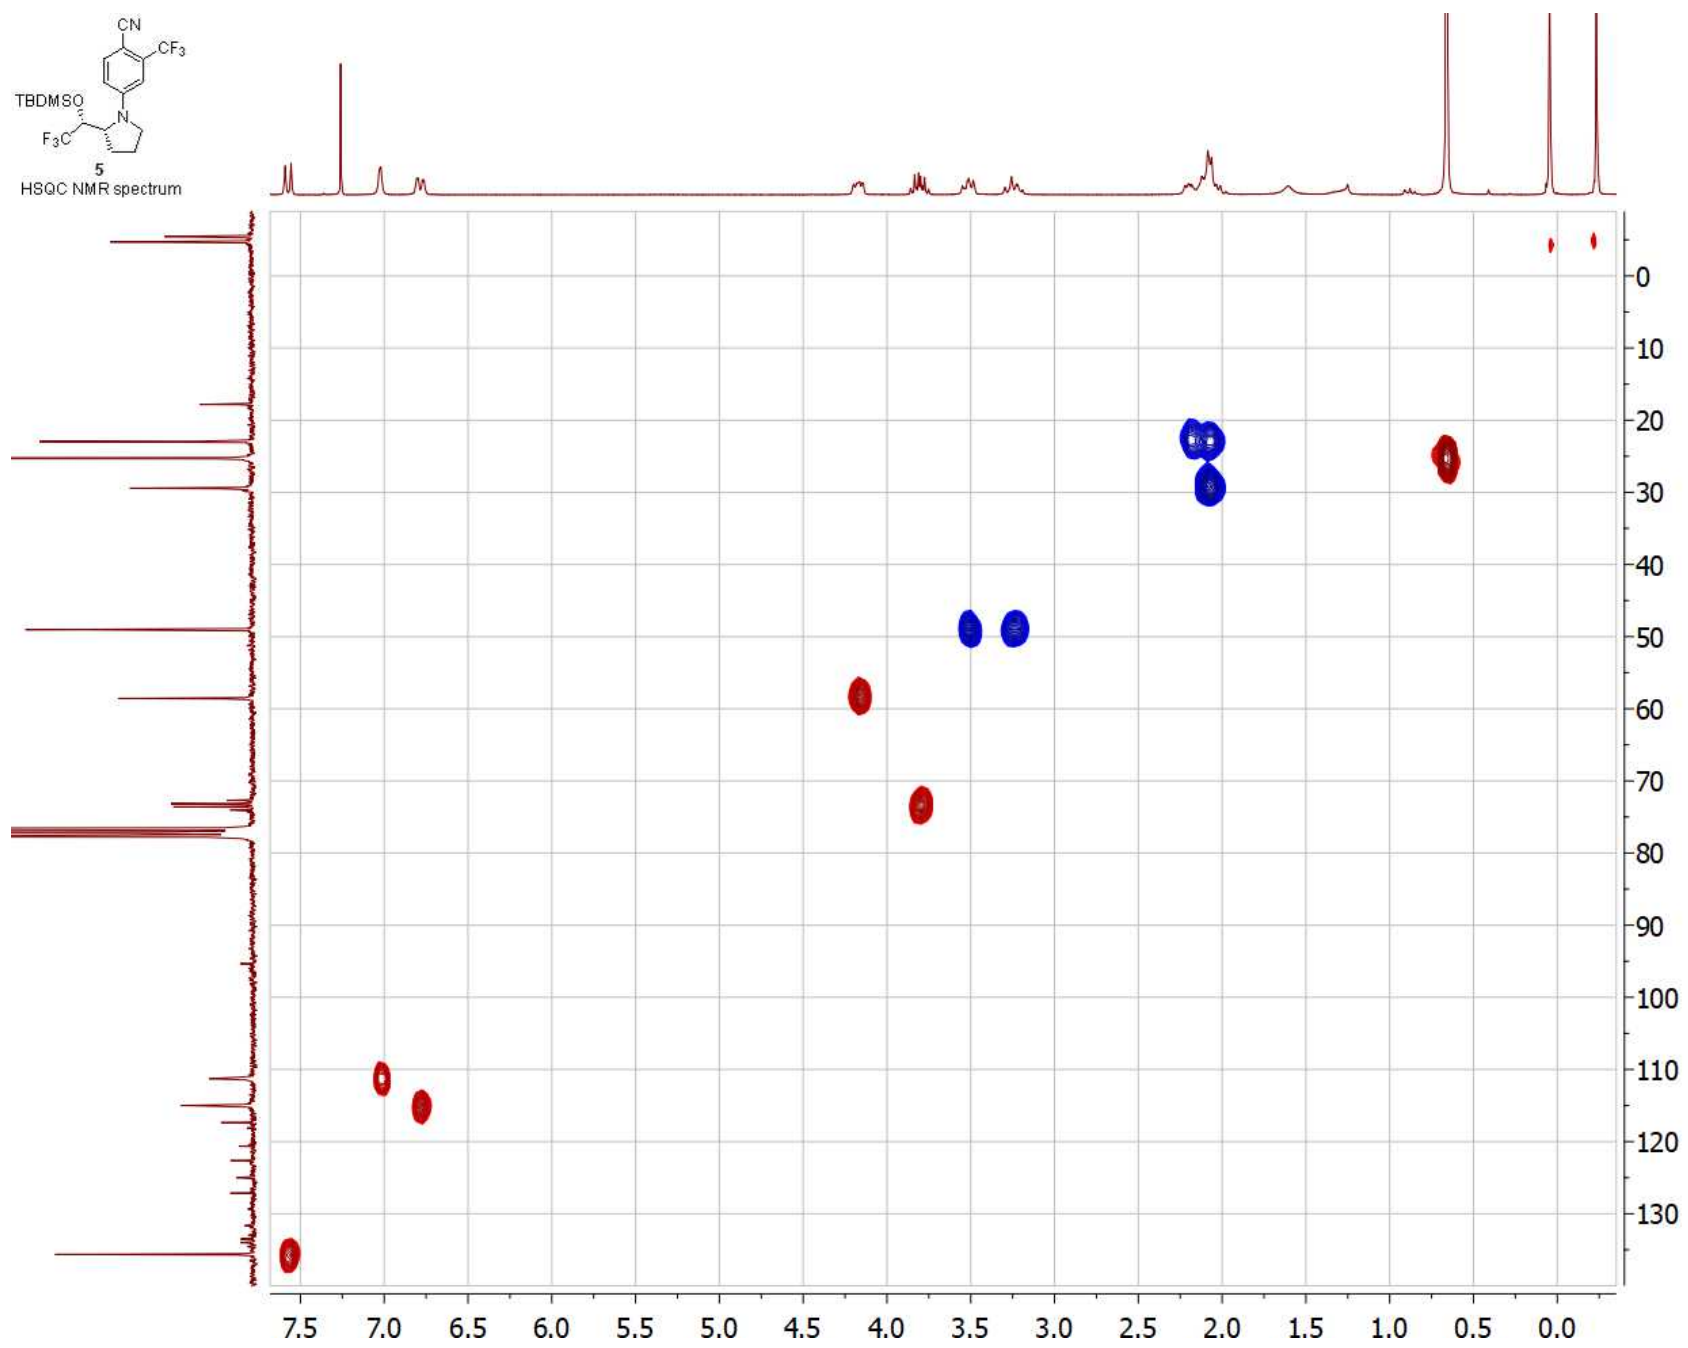



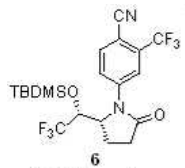

<sup>1</sup>H NMR spectrum  
(CDCl<sub>3</sub>, 500 MHz)

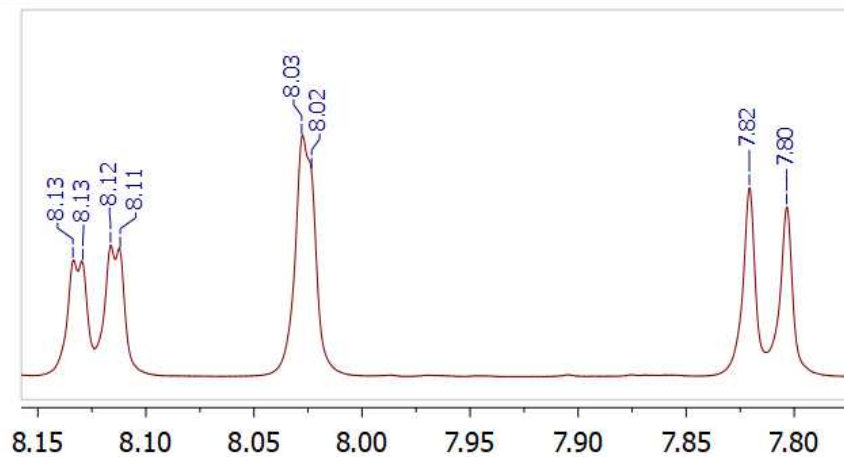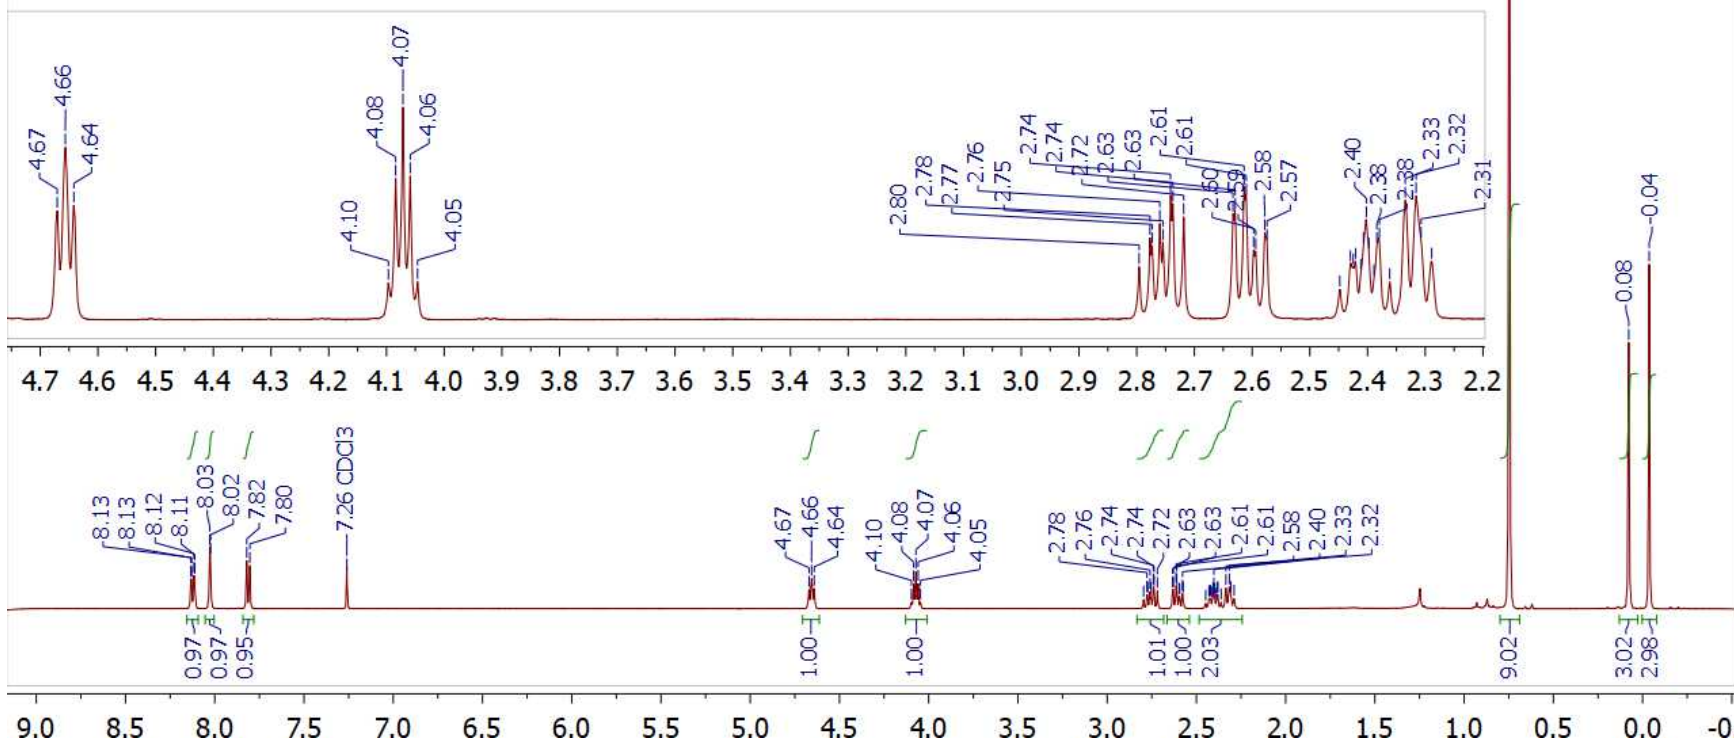

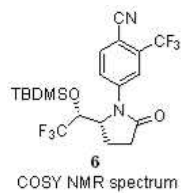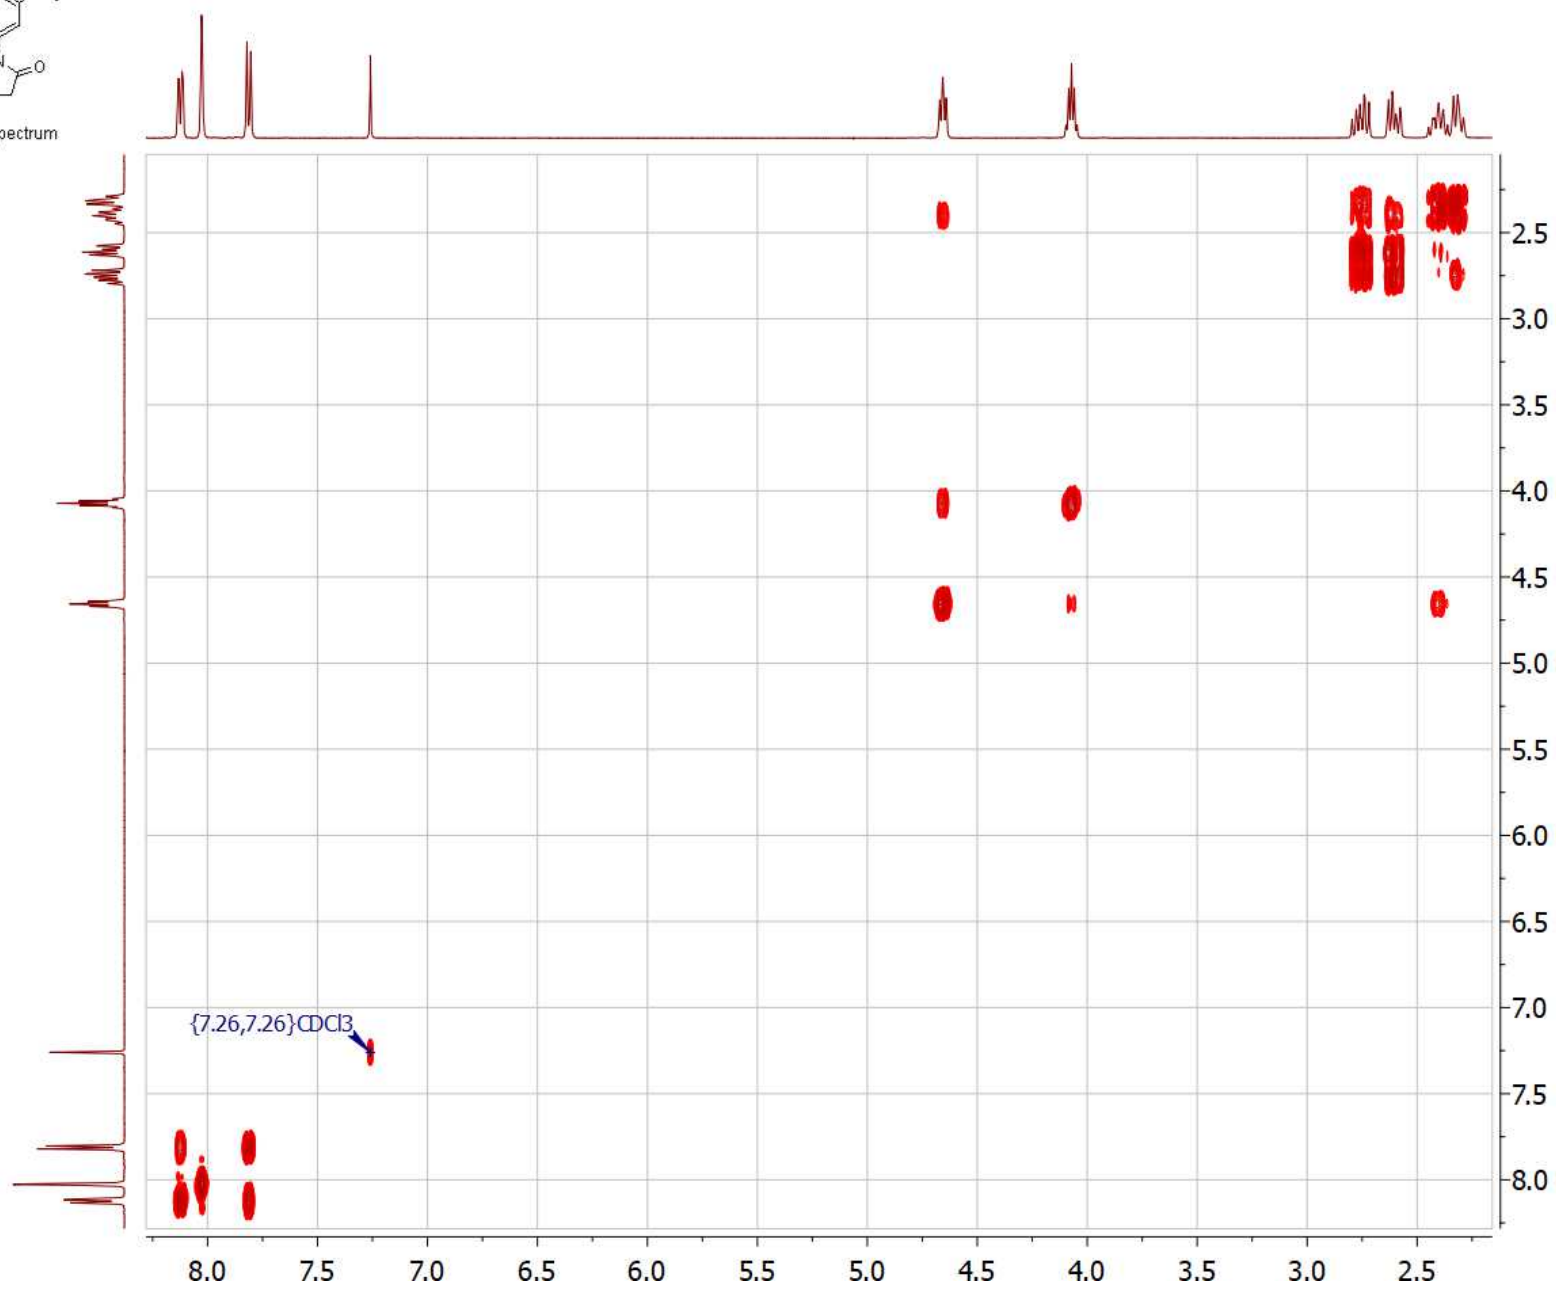

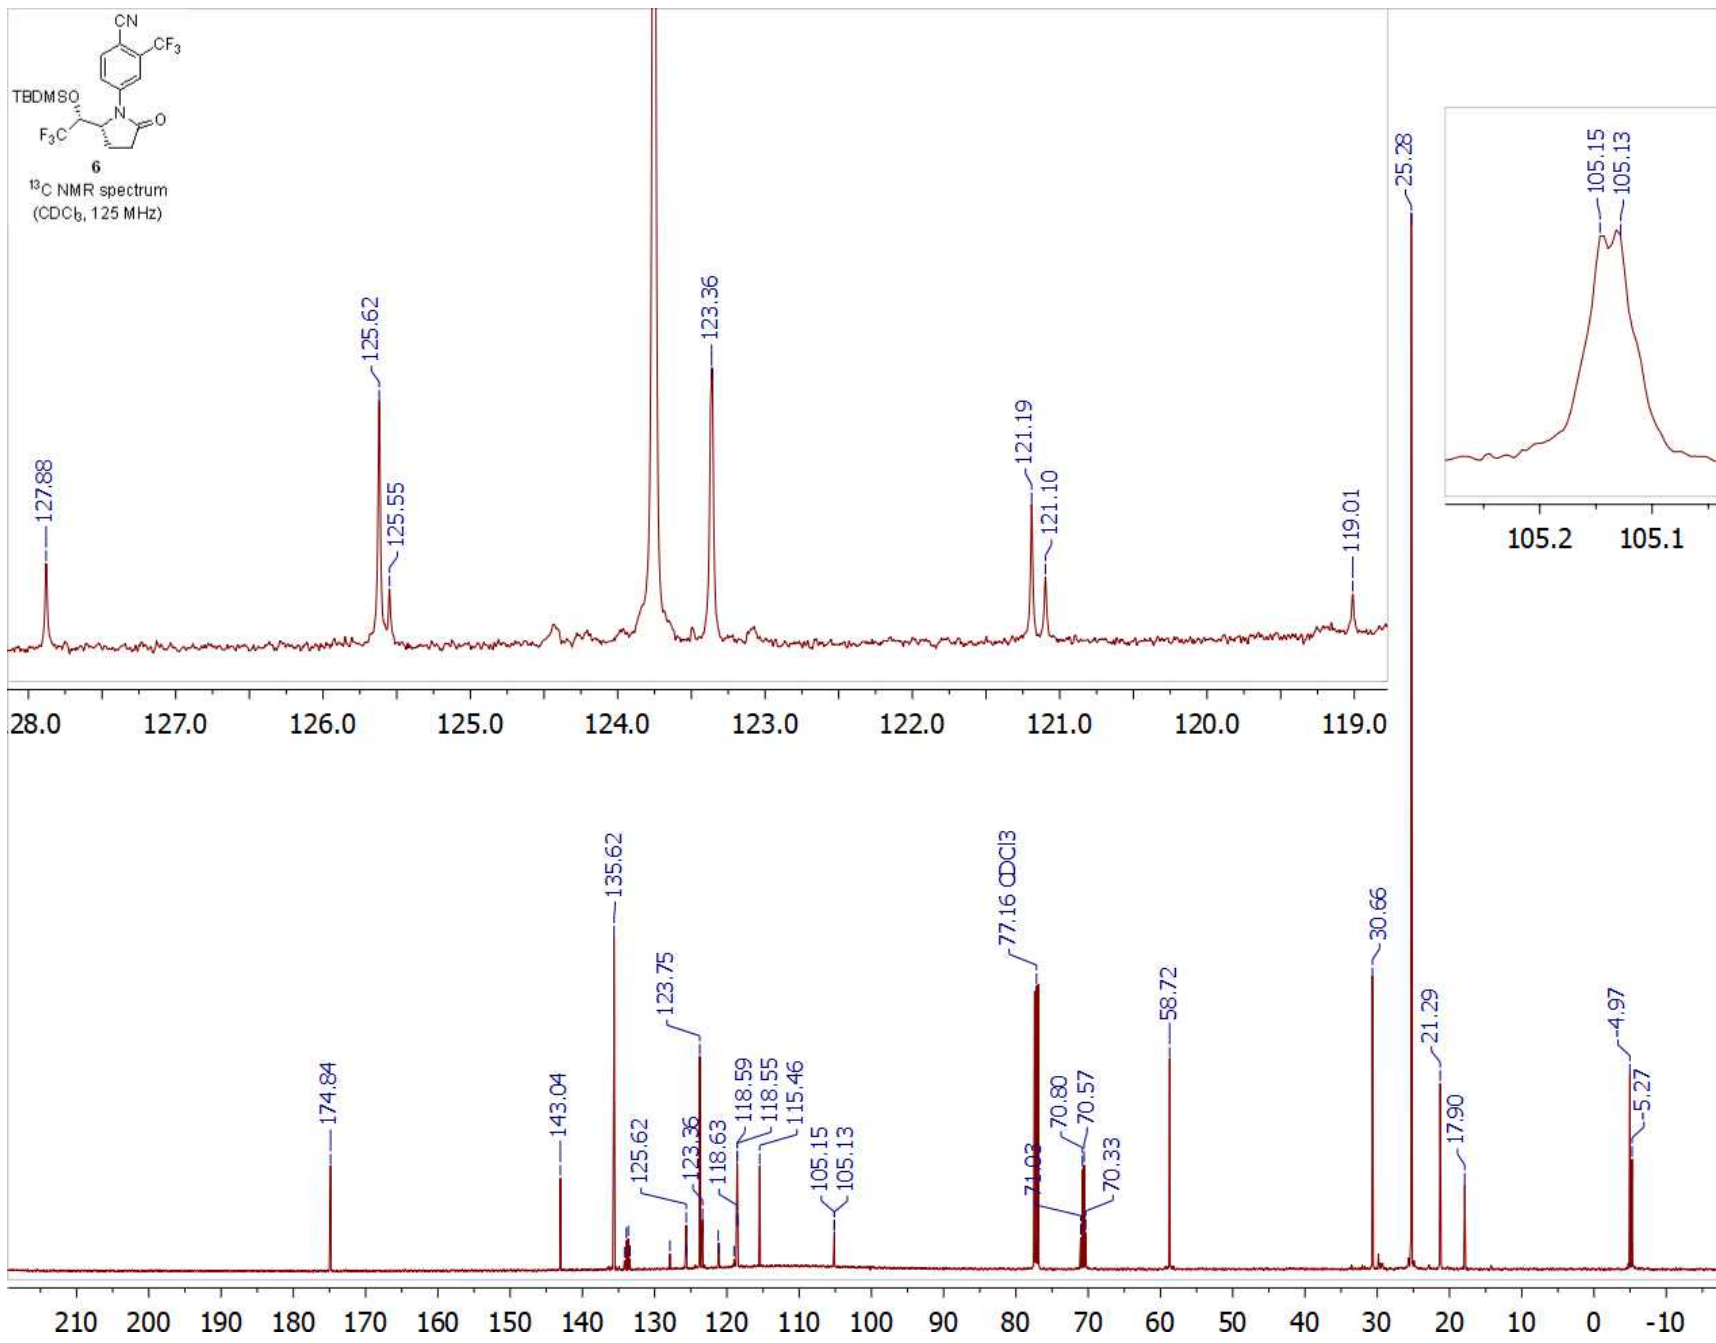

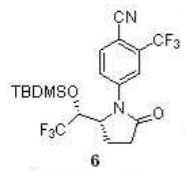

<sup>13</sup>C NMR spectrum  
 (CDCl<sub>3</sub>, 62.5 MHz)

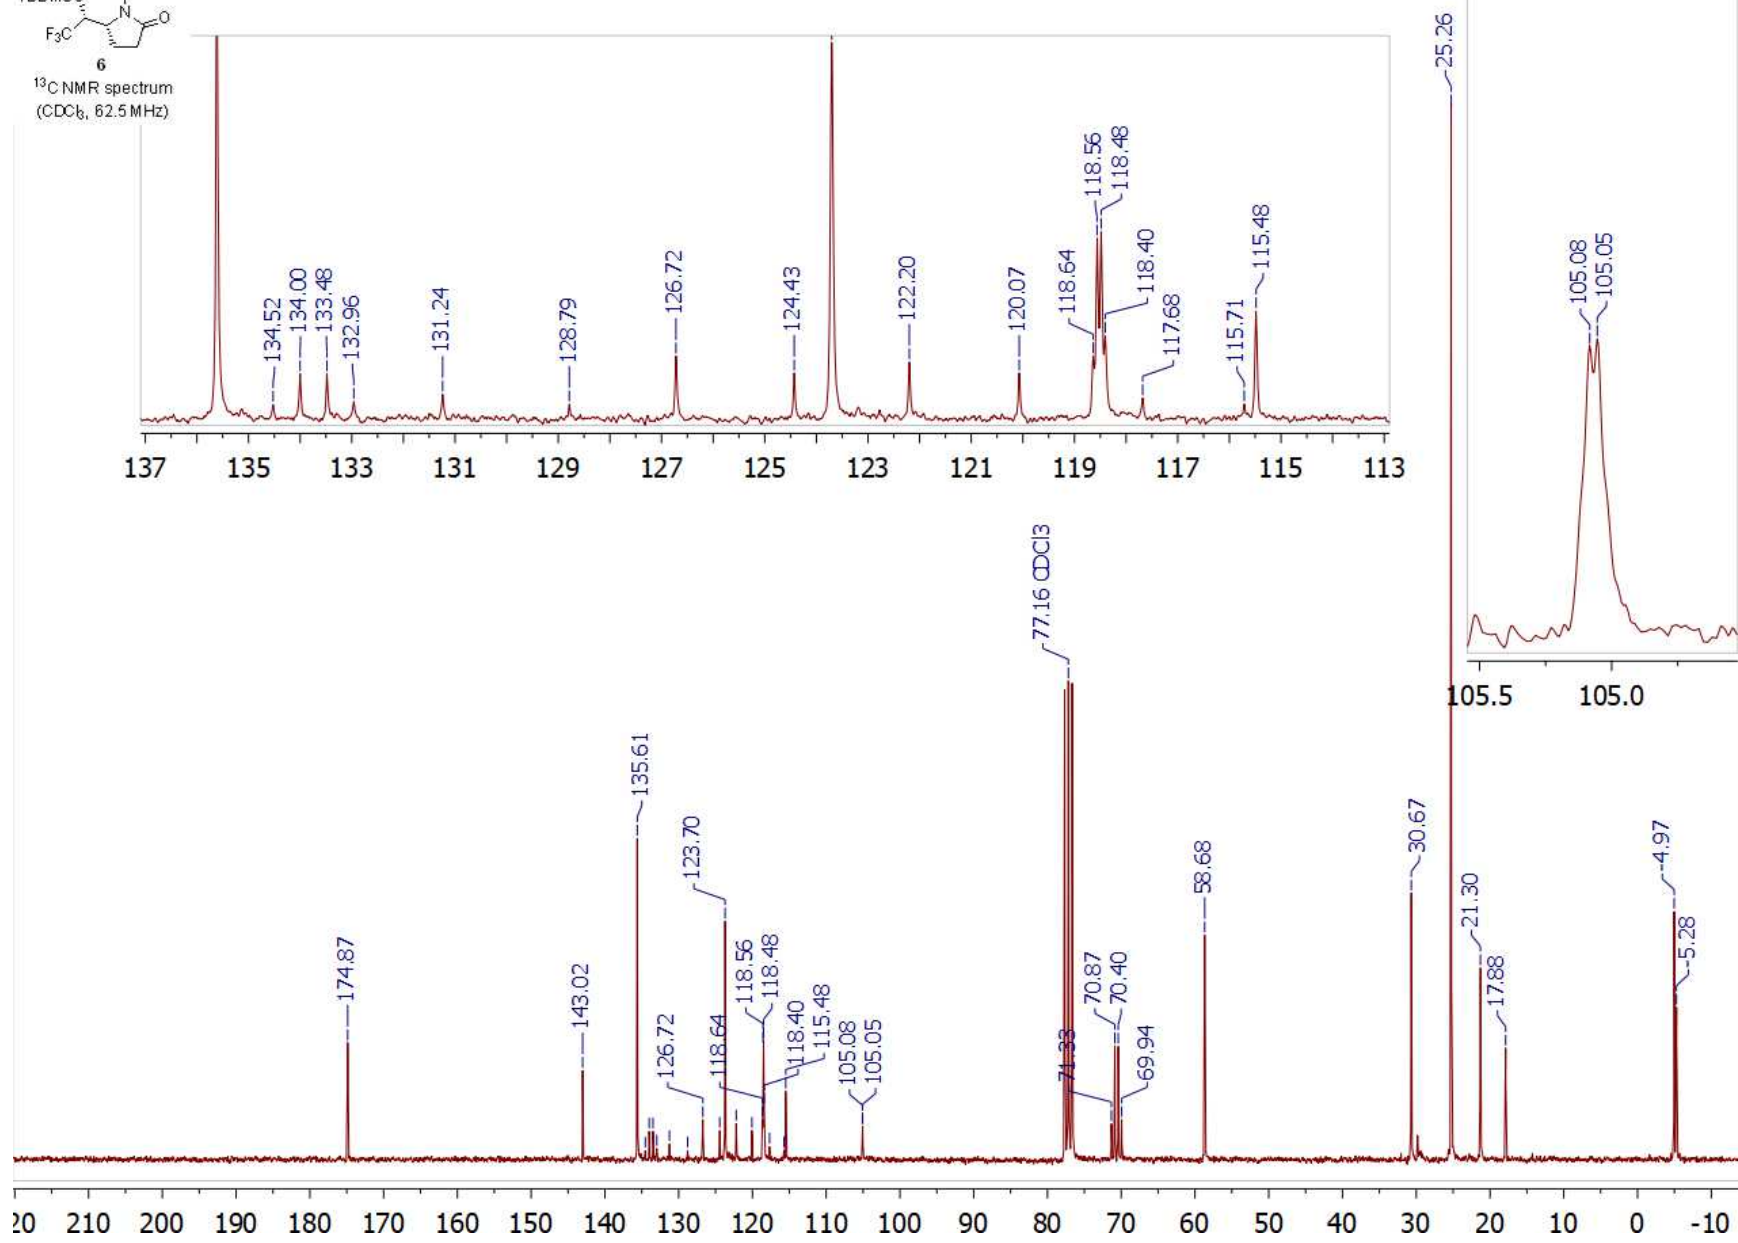

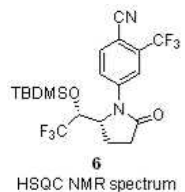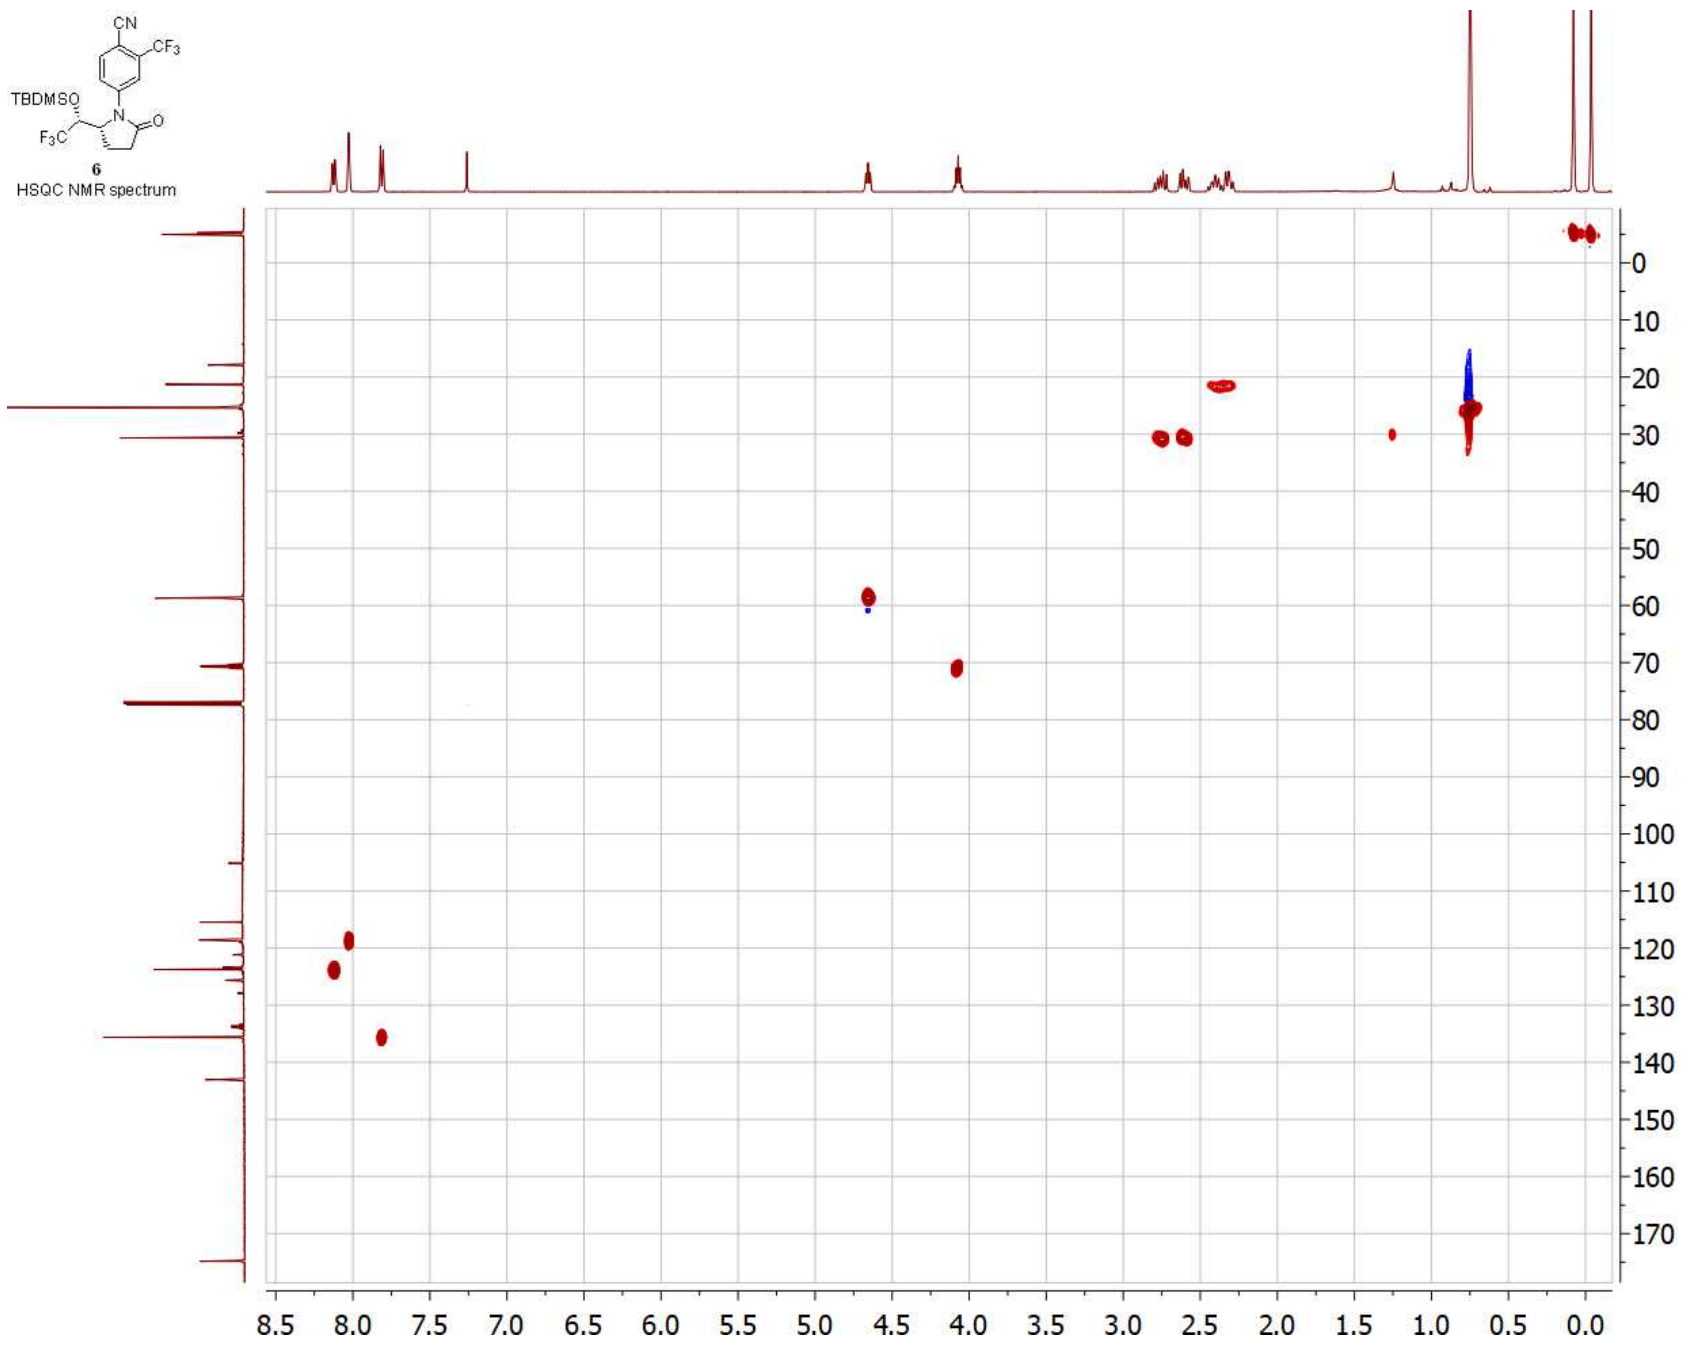

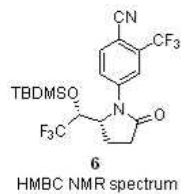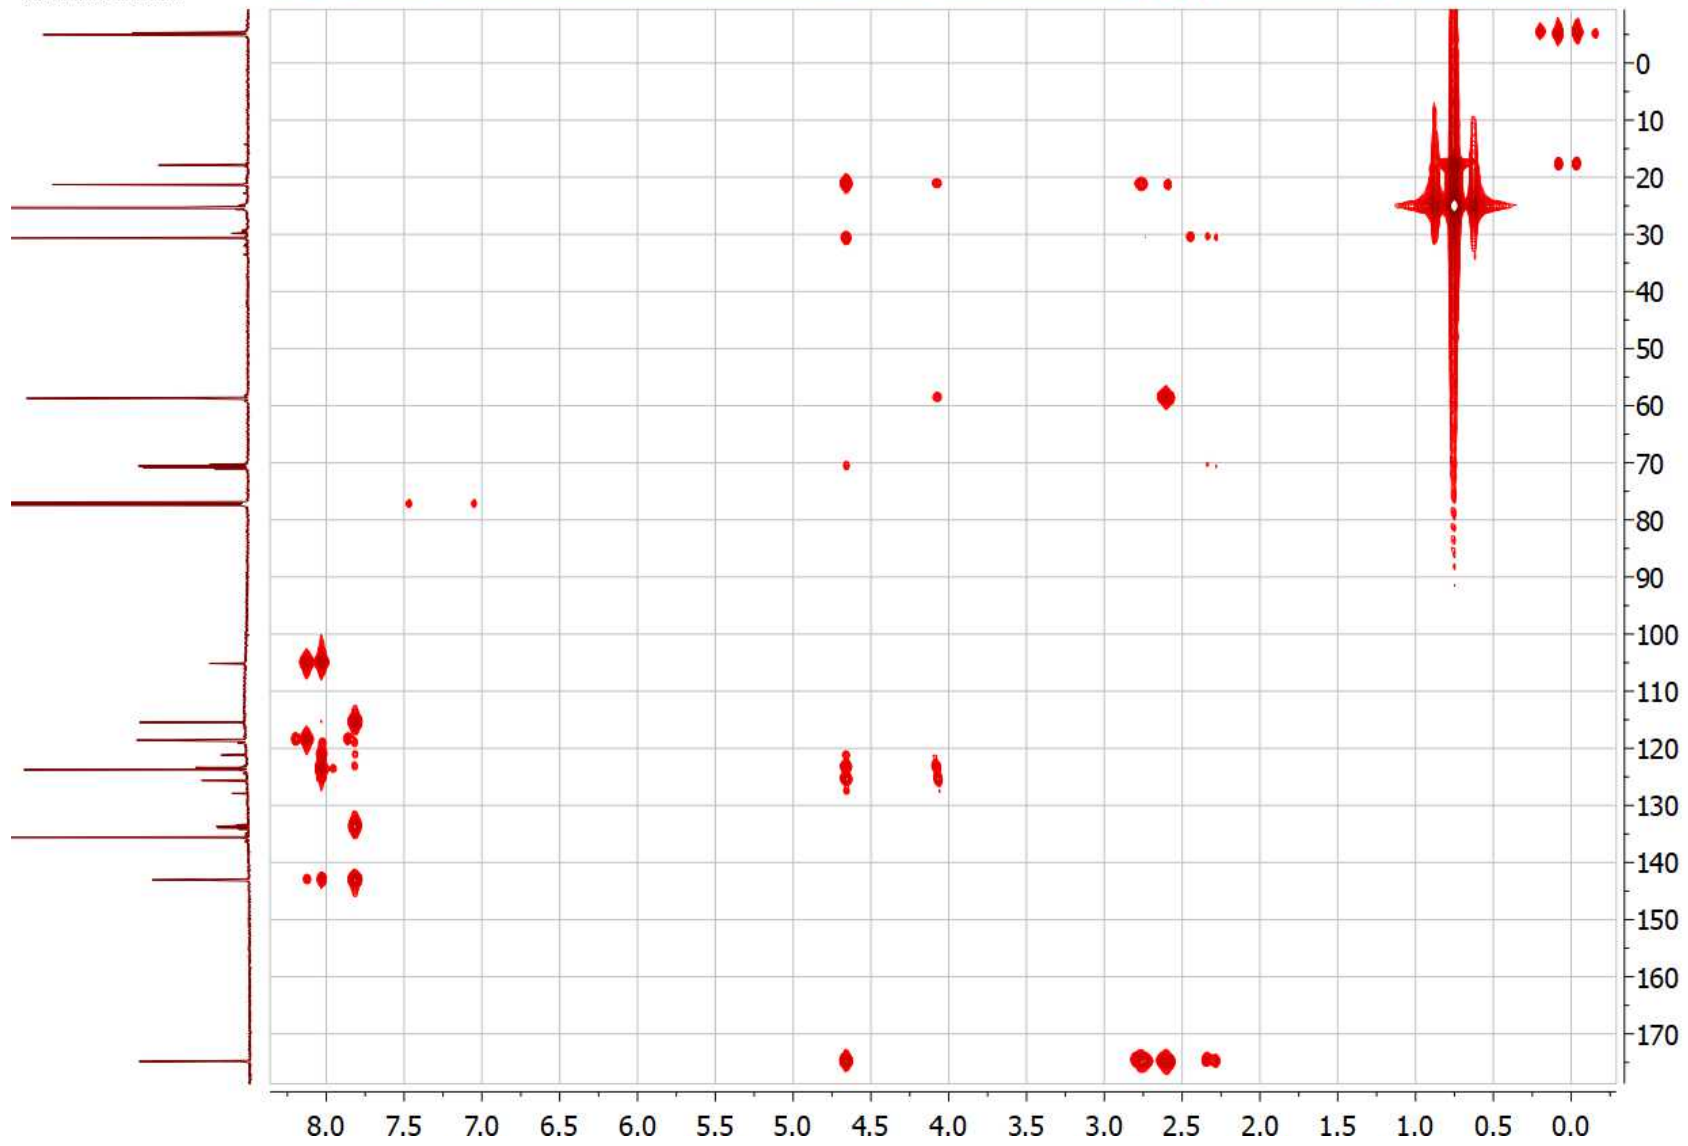

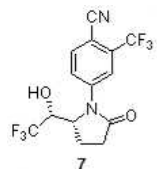

<sup>1</sup>H NMR spectrum  
(CD<sub>3</sub>OD, 500 MHz)

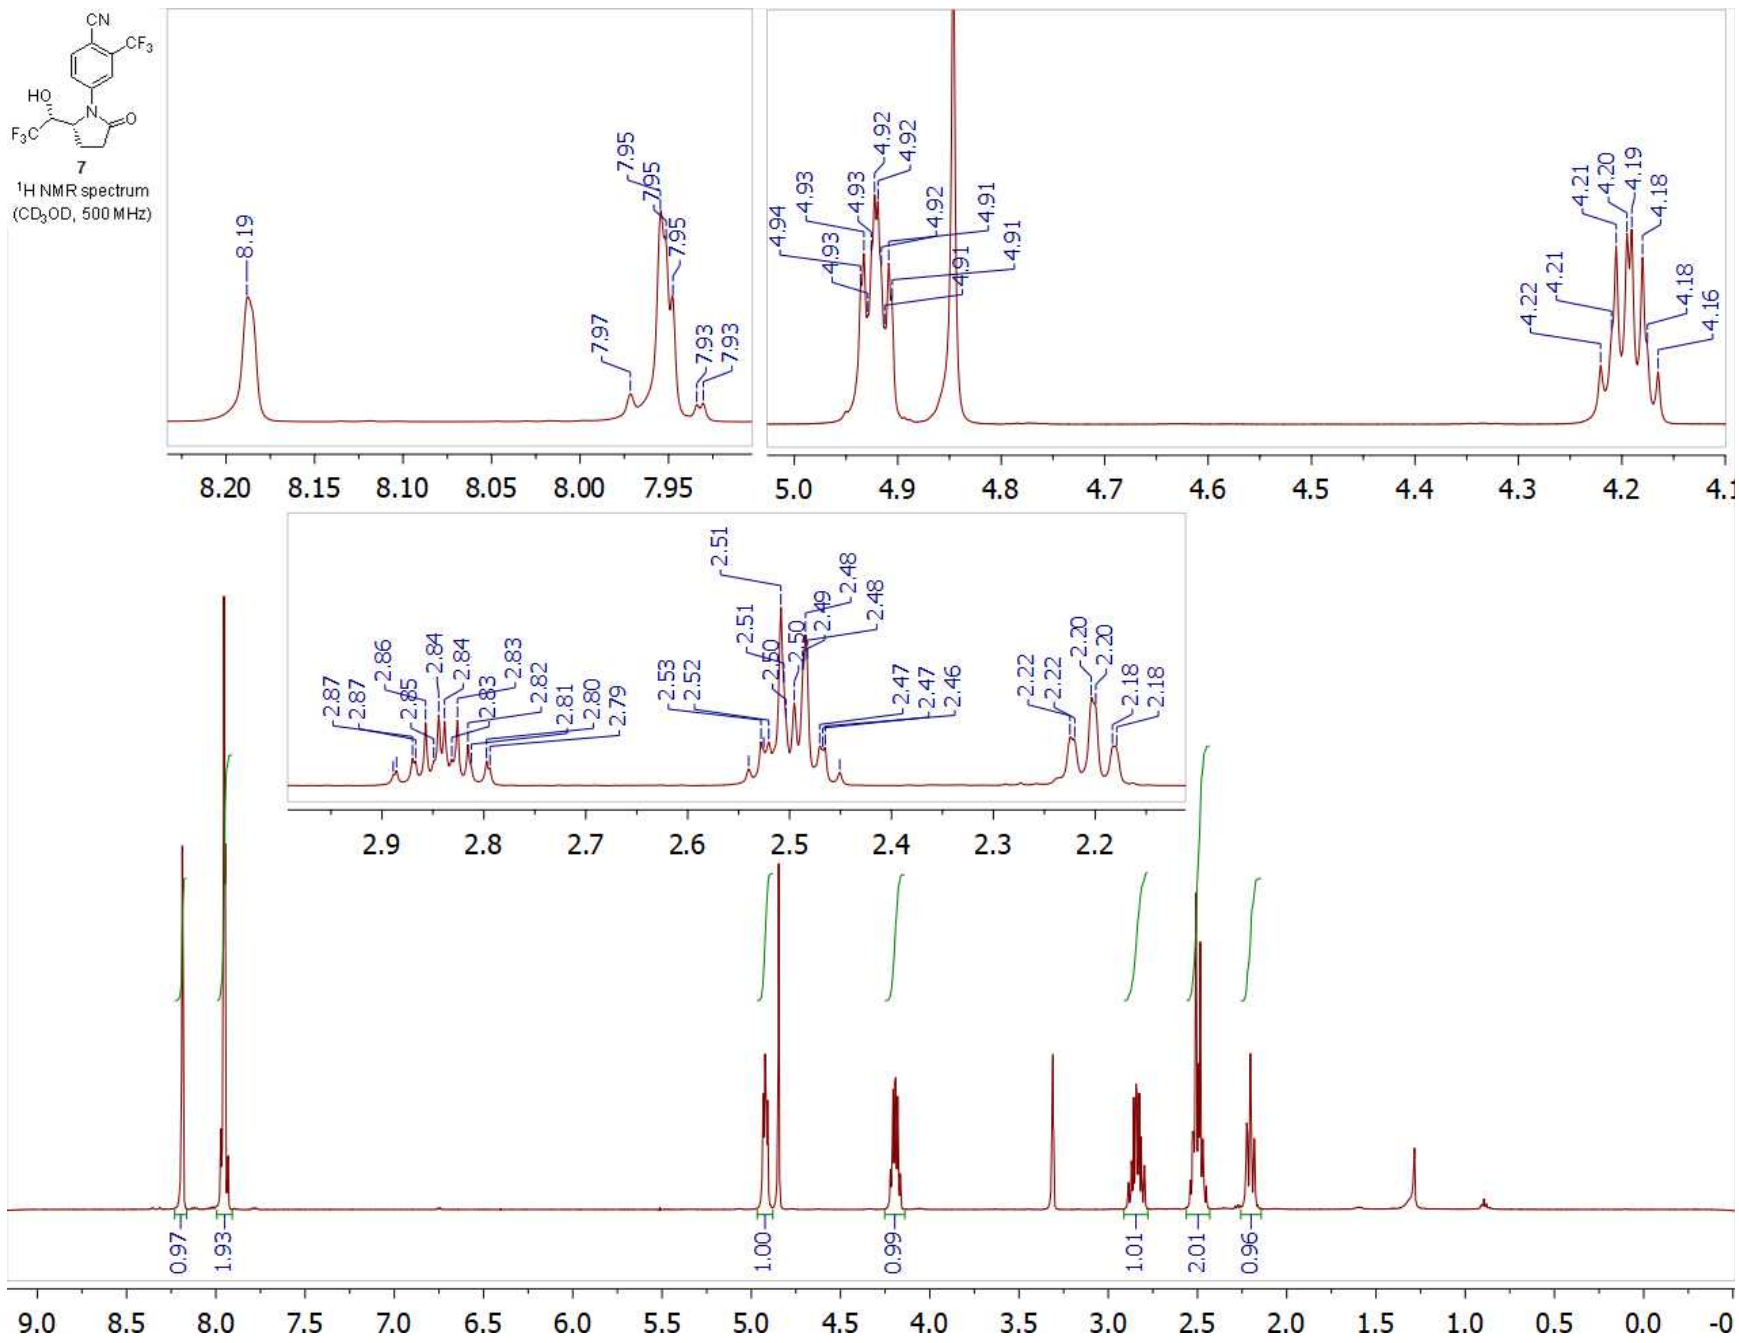



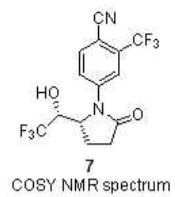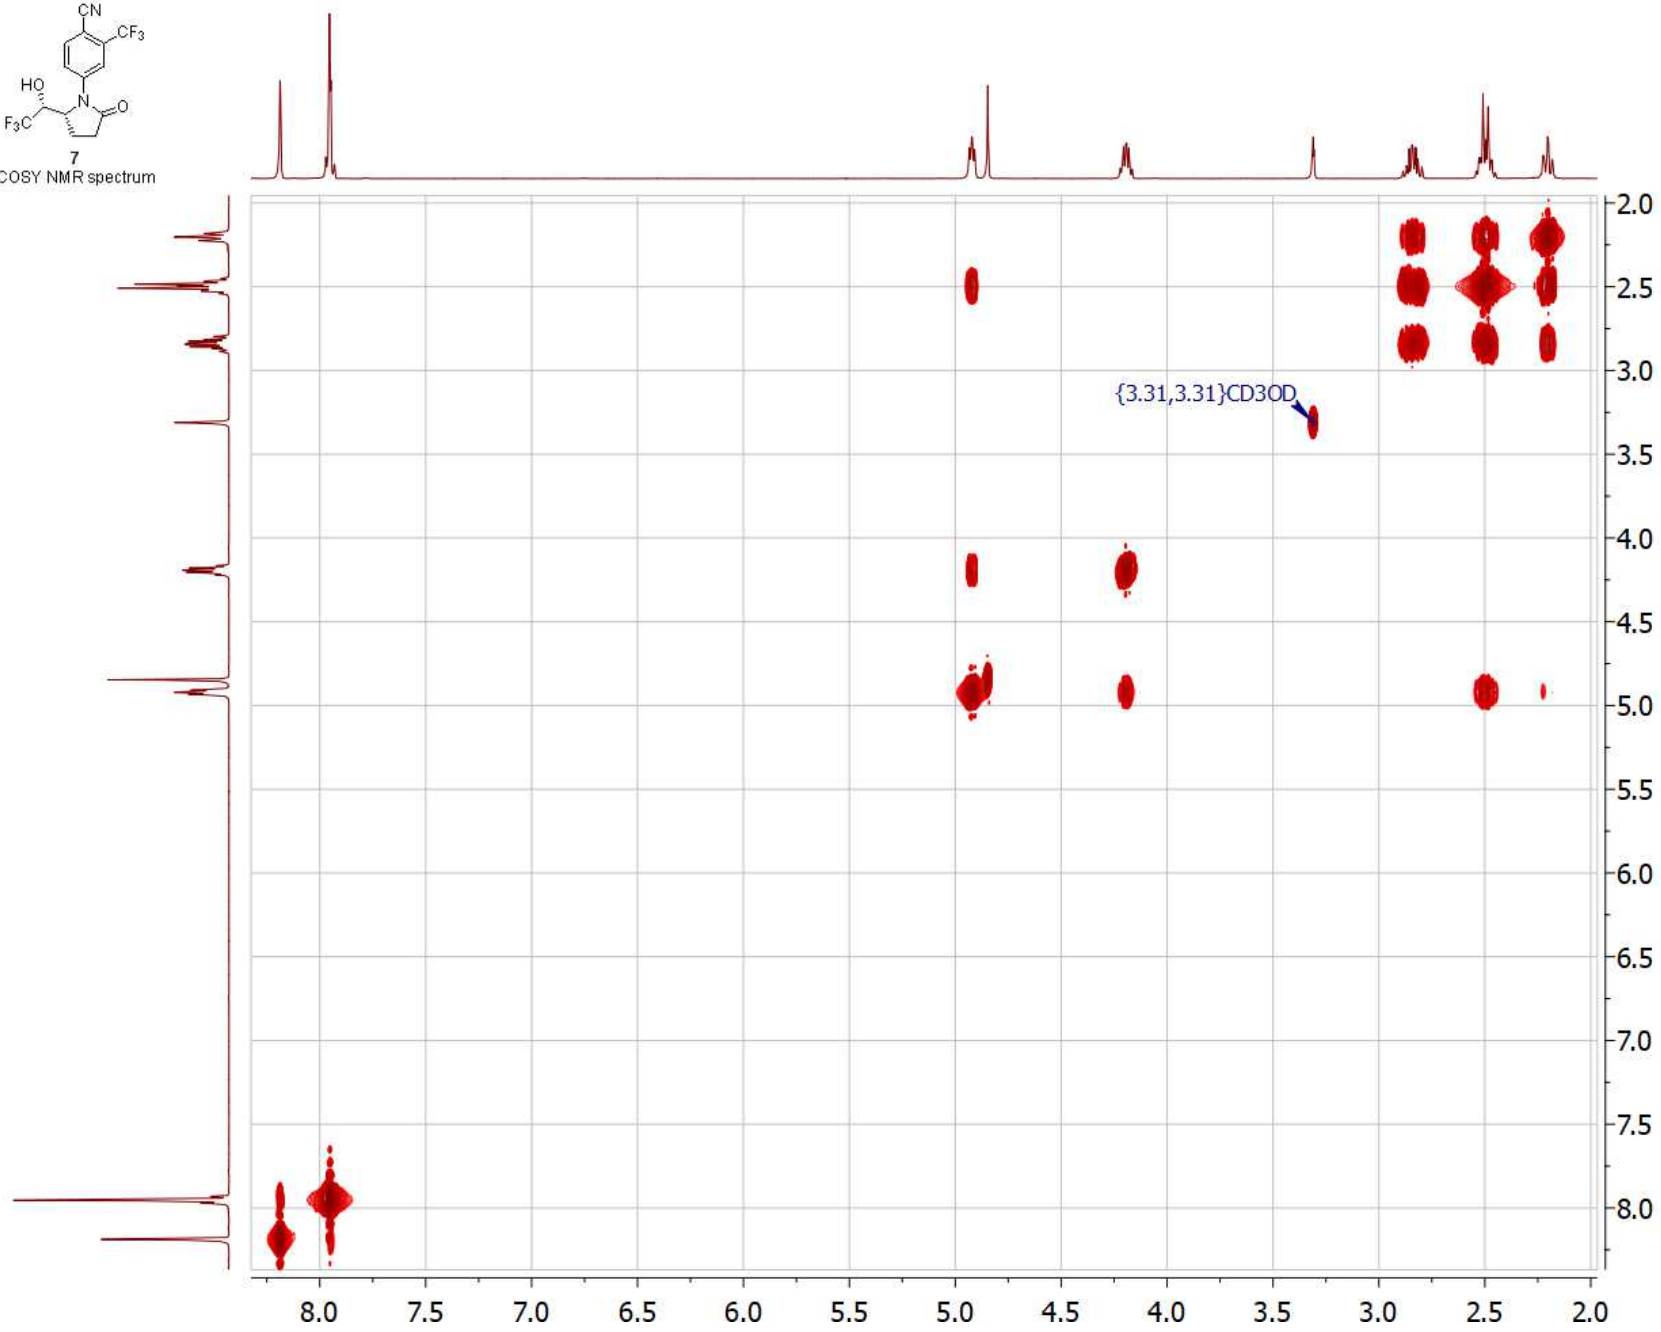



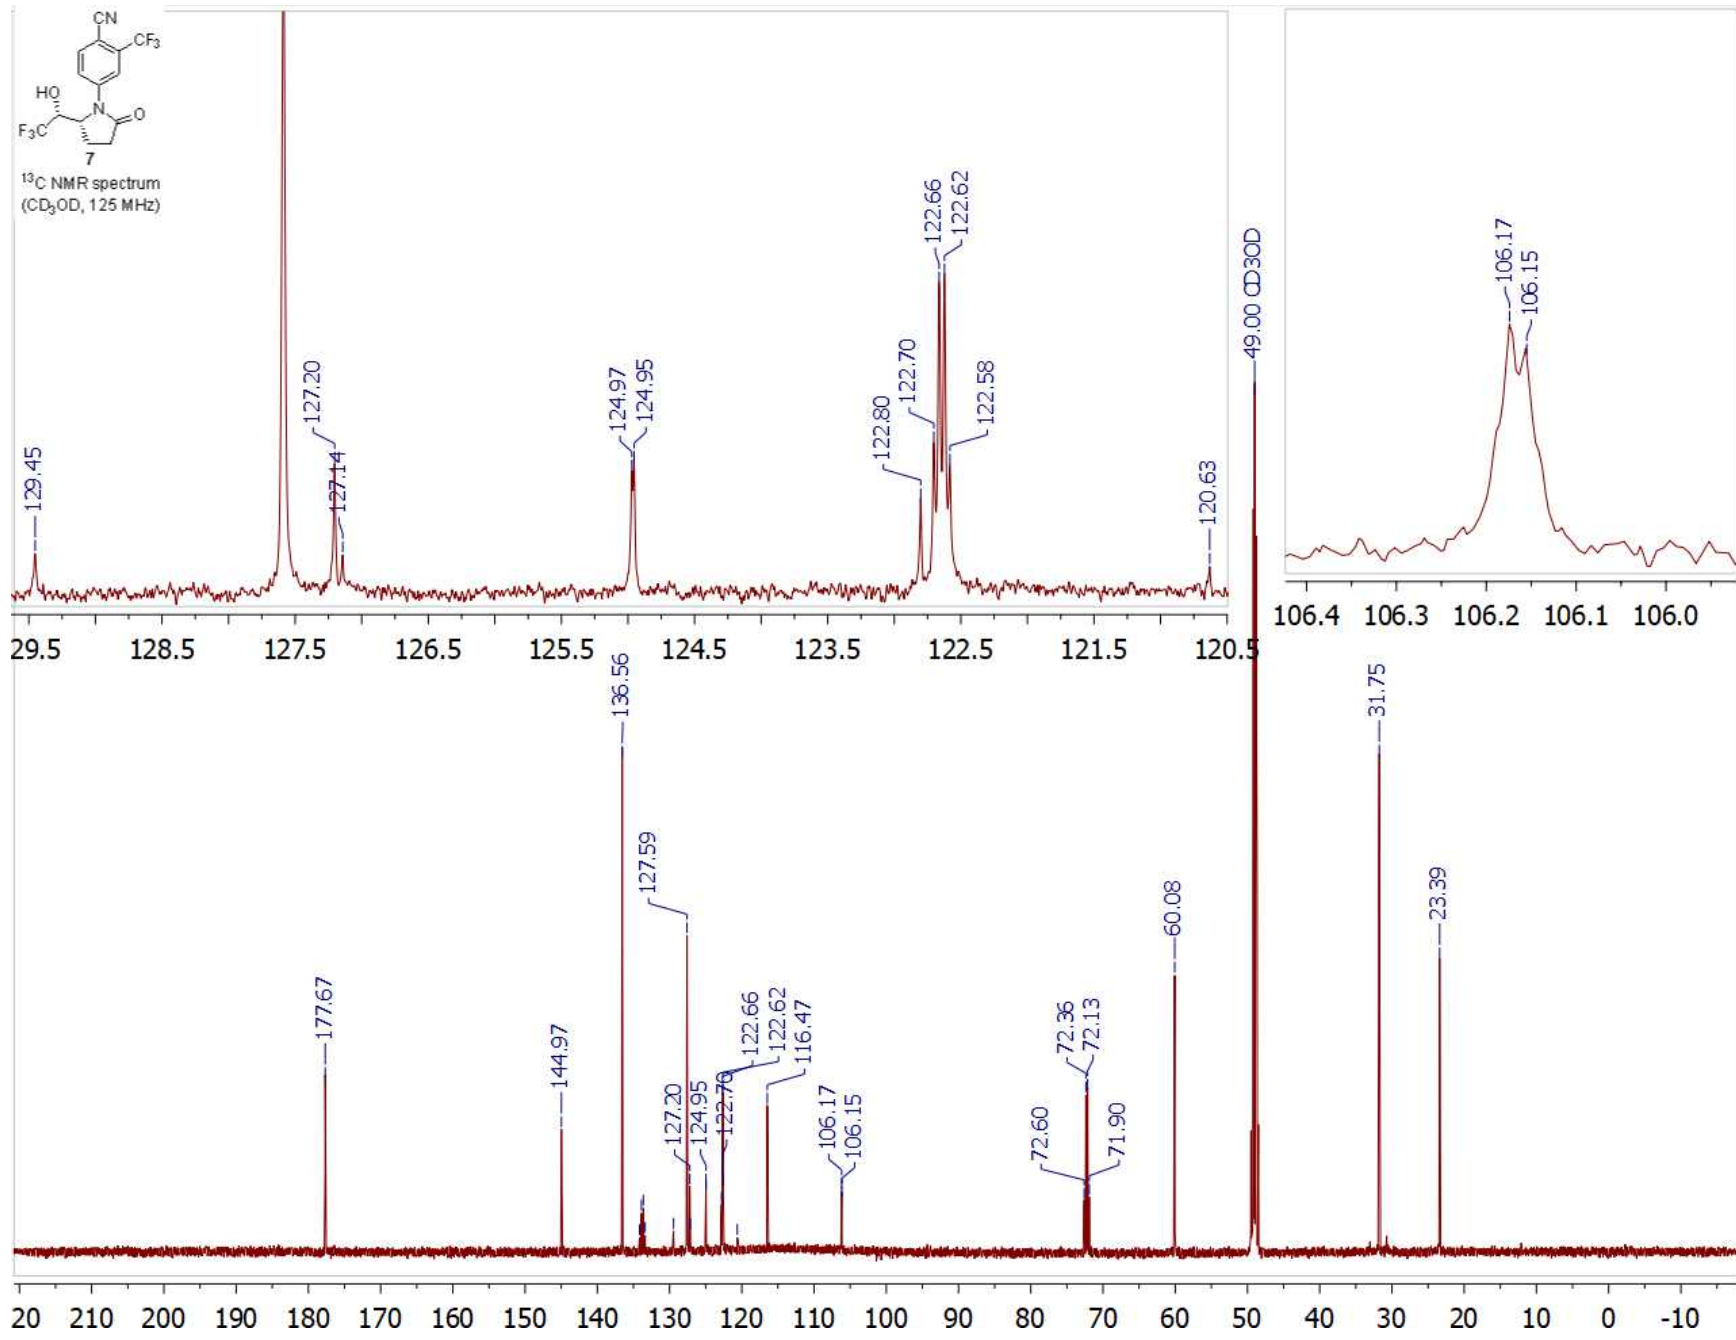

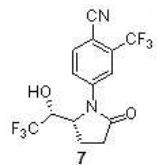

$^{13}\text{C}$  NMR spectrum  
( $\text{CD}_3\text{OD}$ , 62.5 MHz)

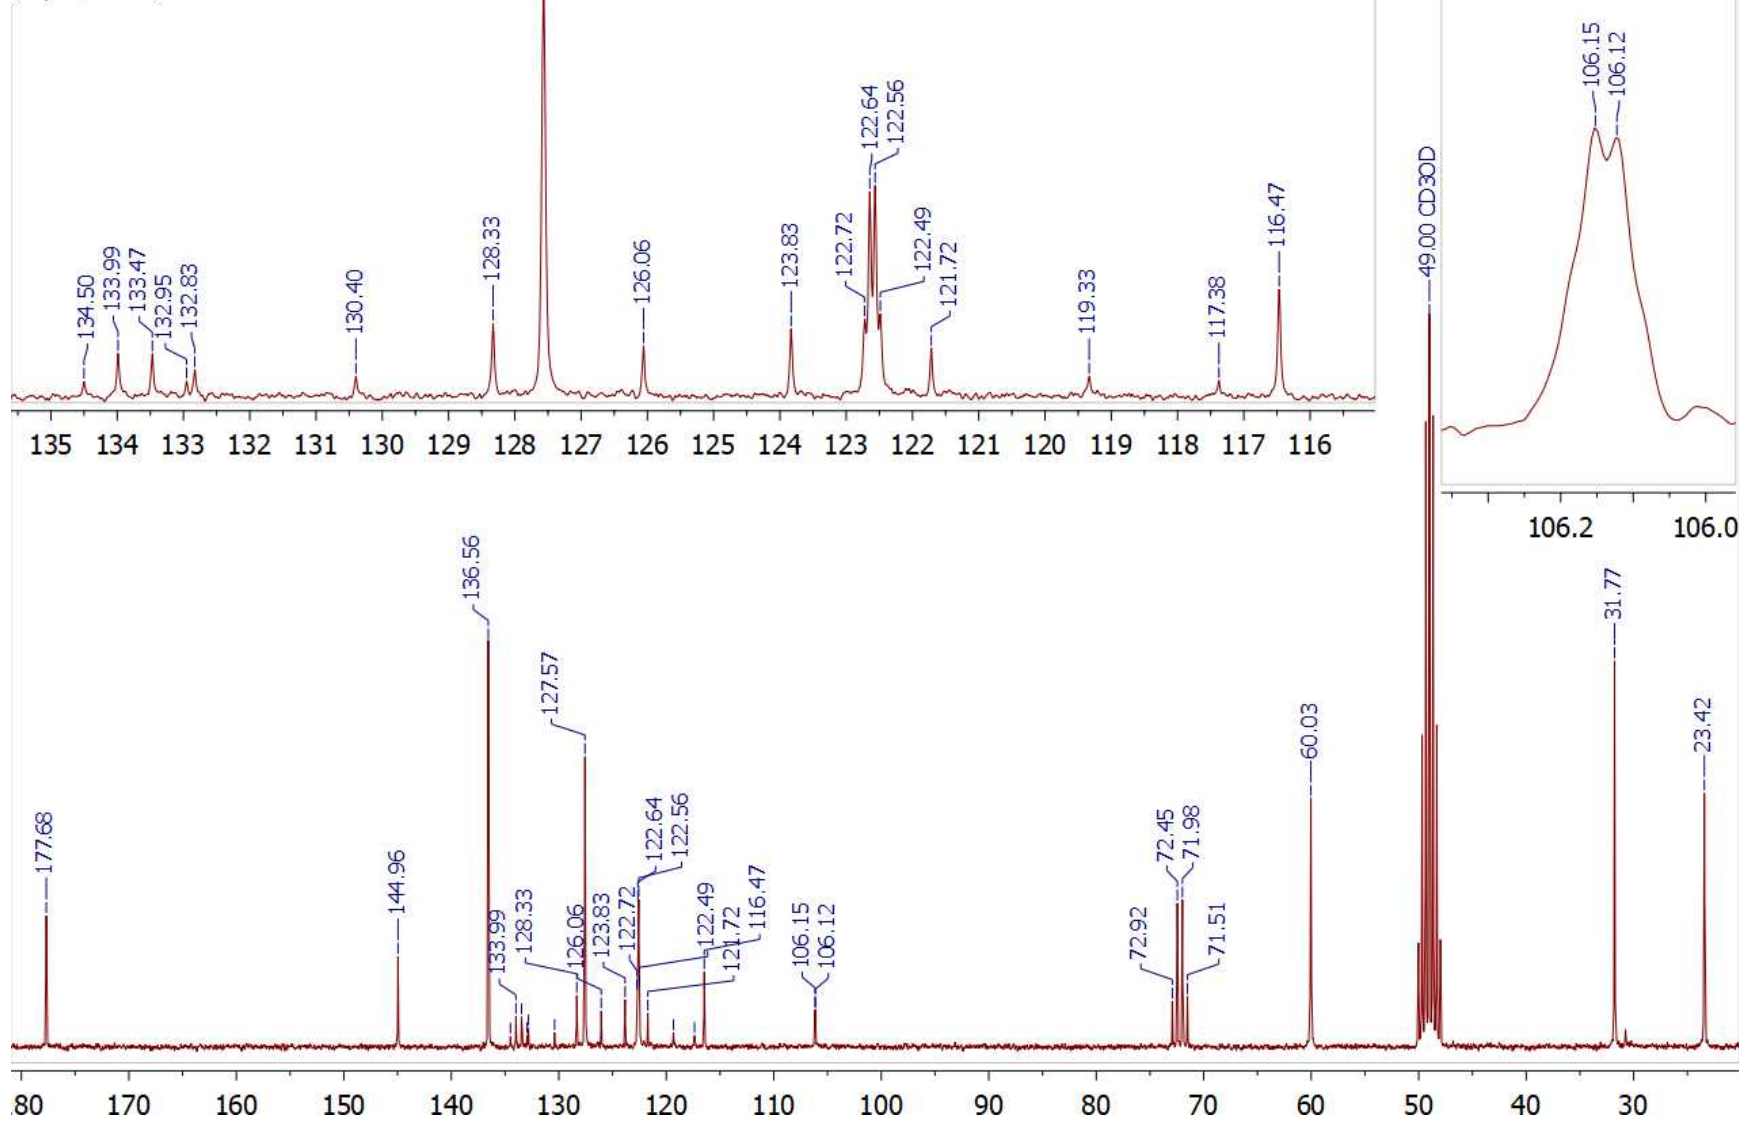

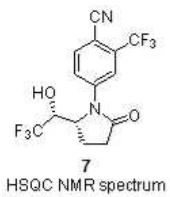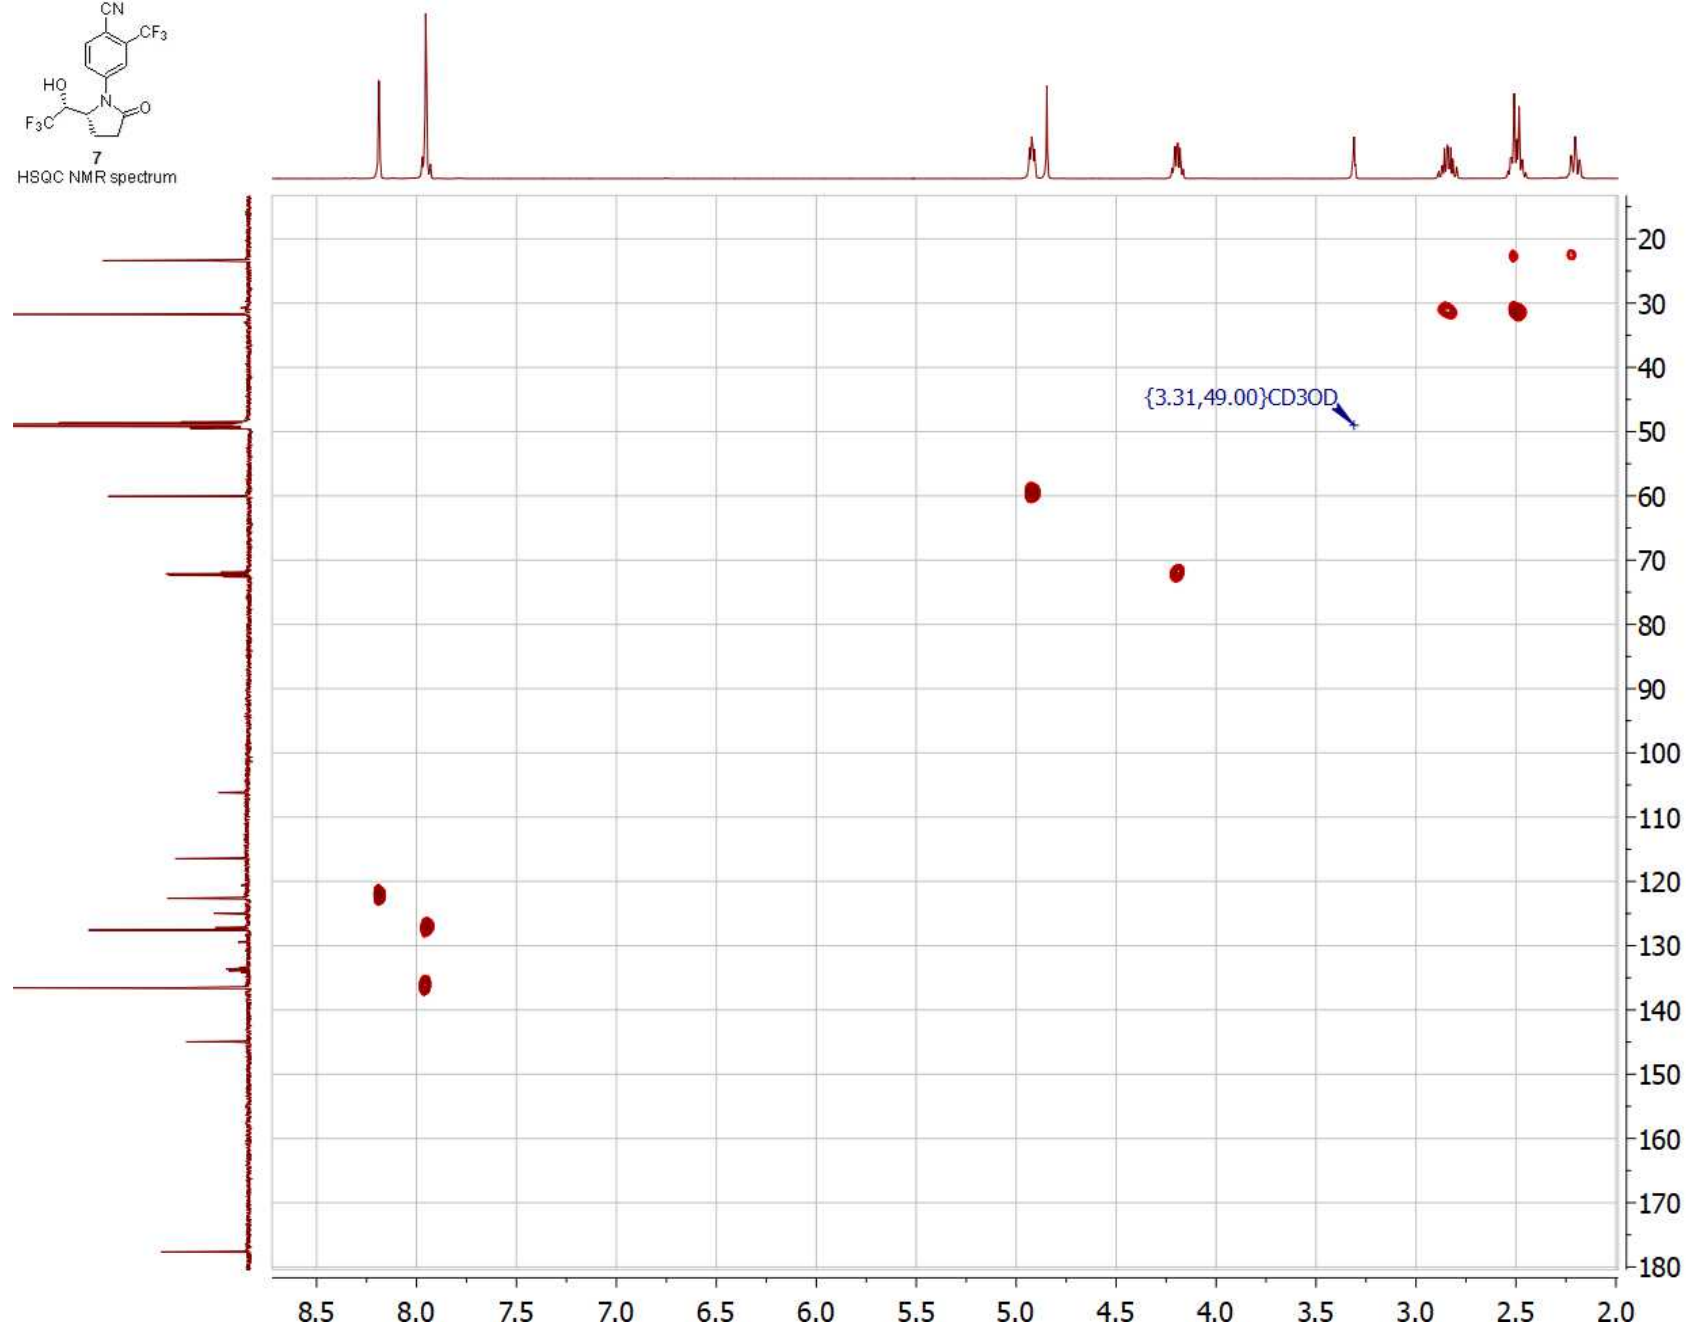

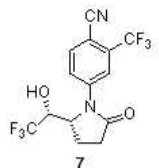

HMBC NMR spectrum

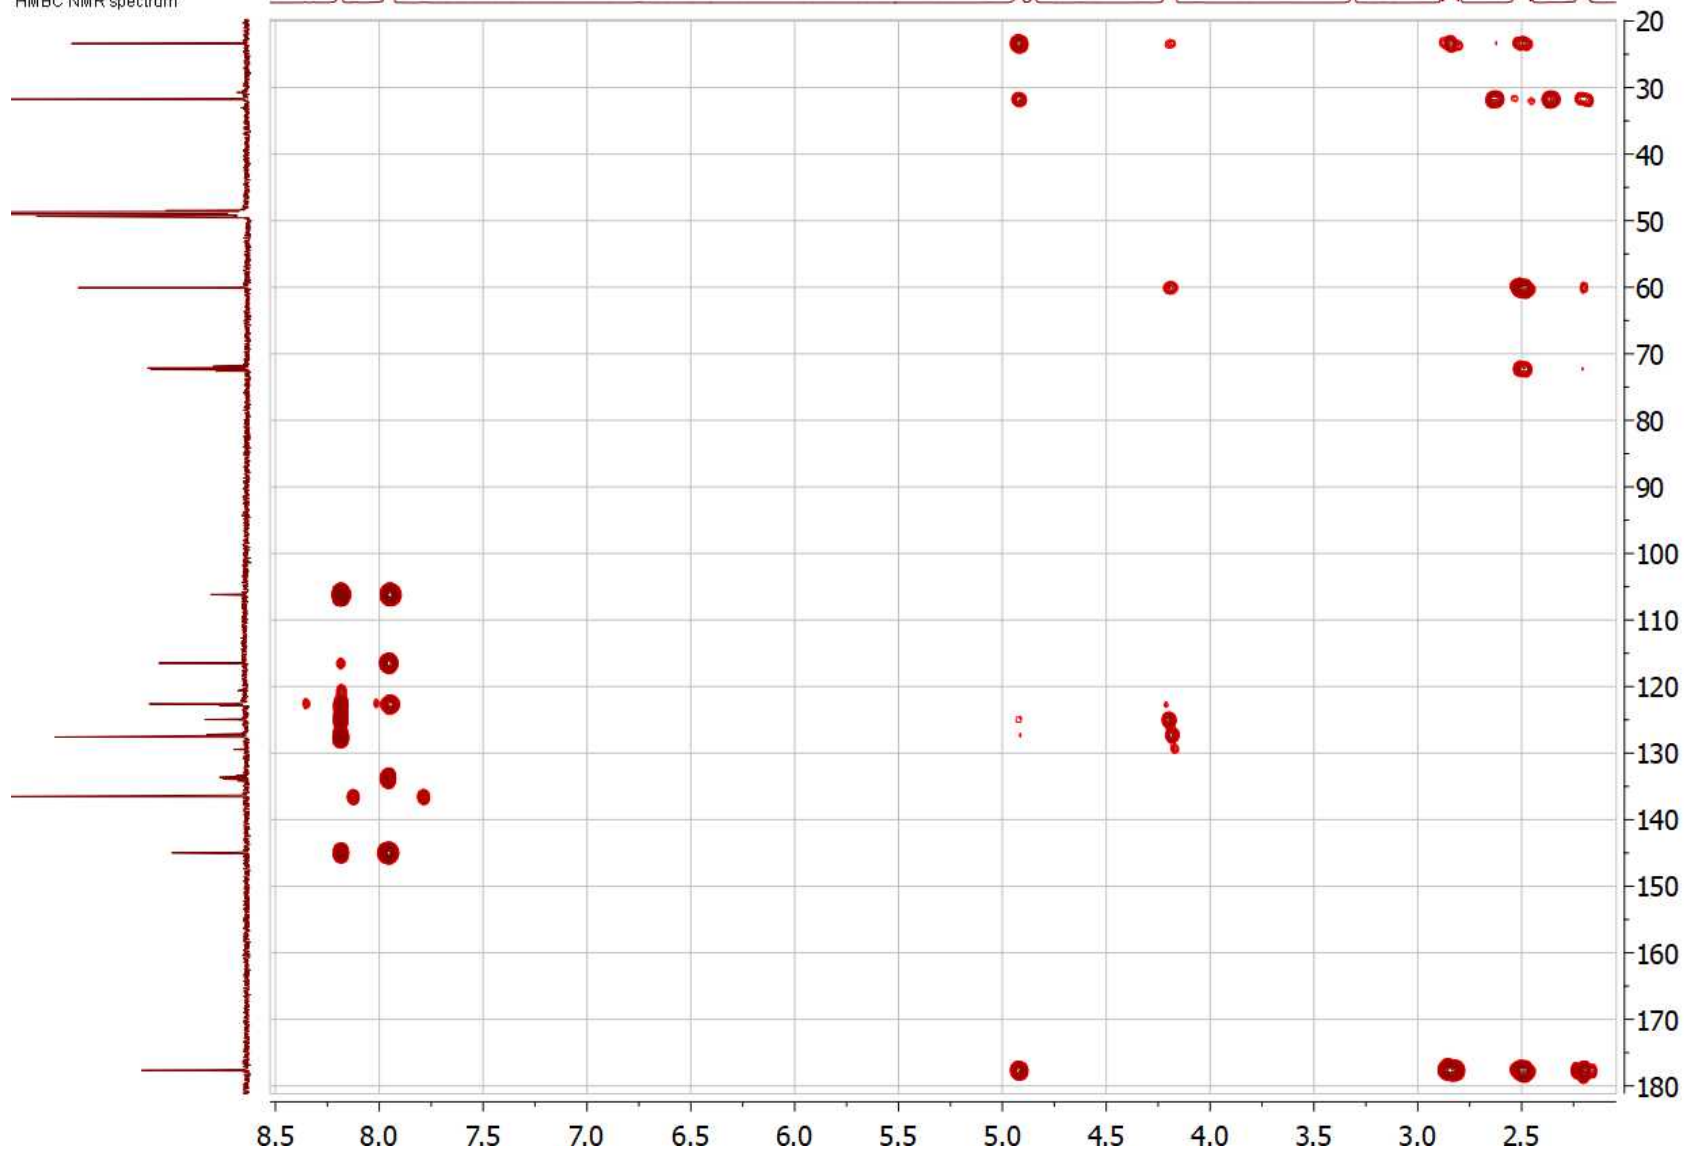

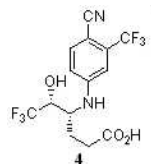

<sup>1</sup>H NMR spectrum  
(CD<sub>3</sub>OD, 500 MHz)

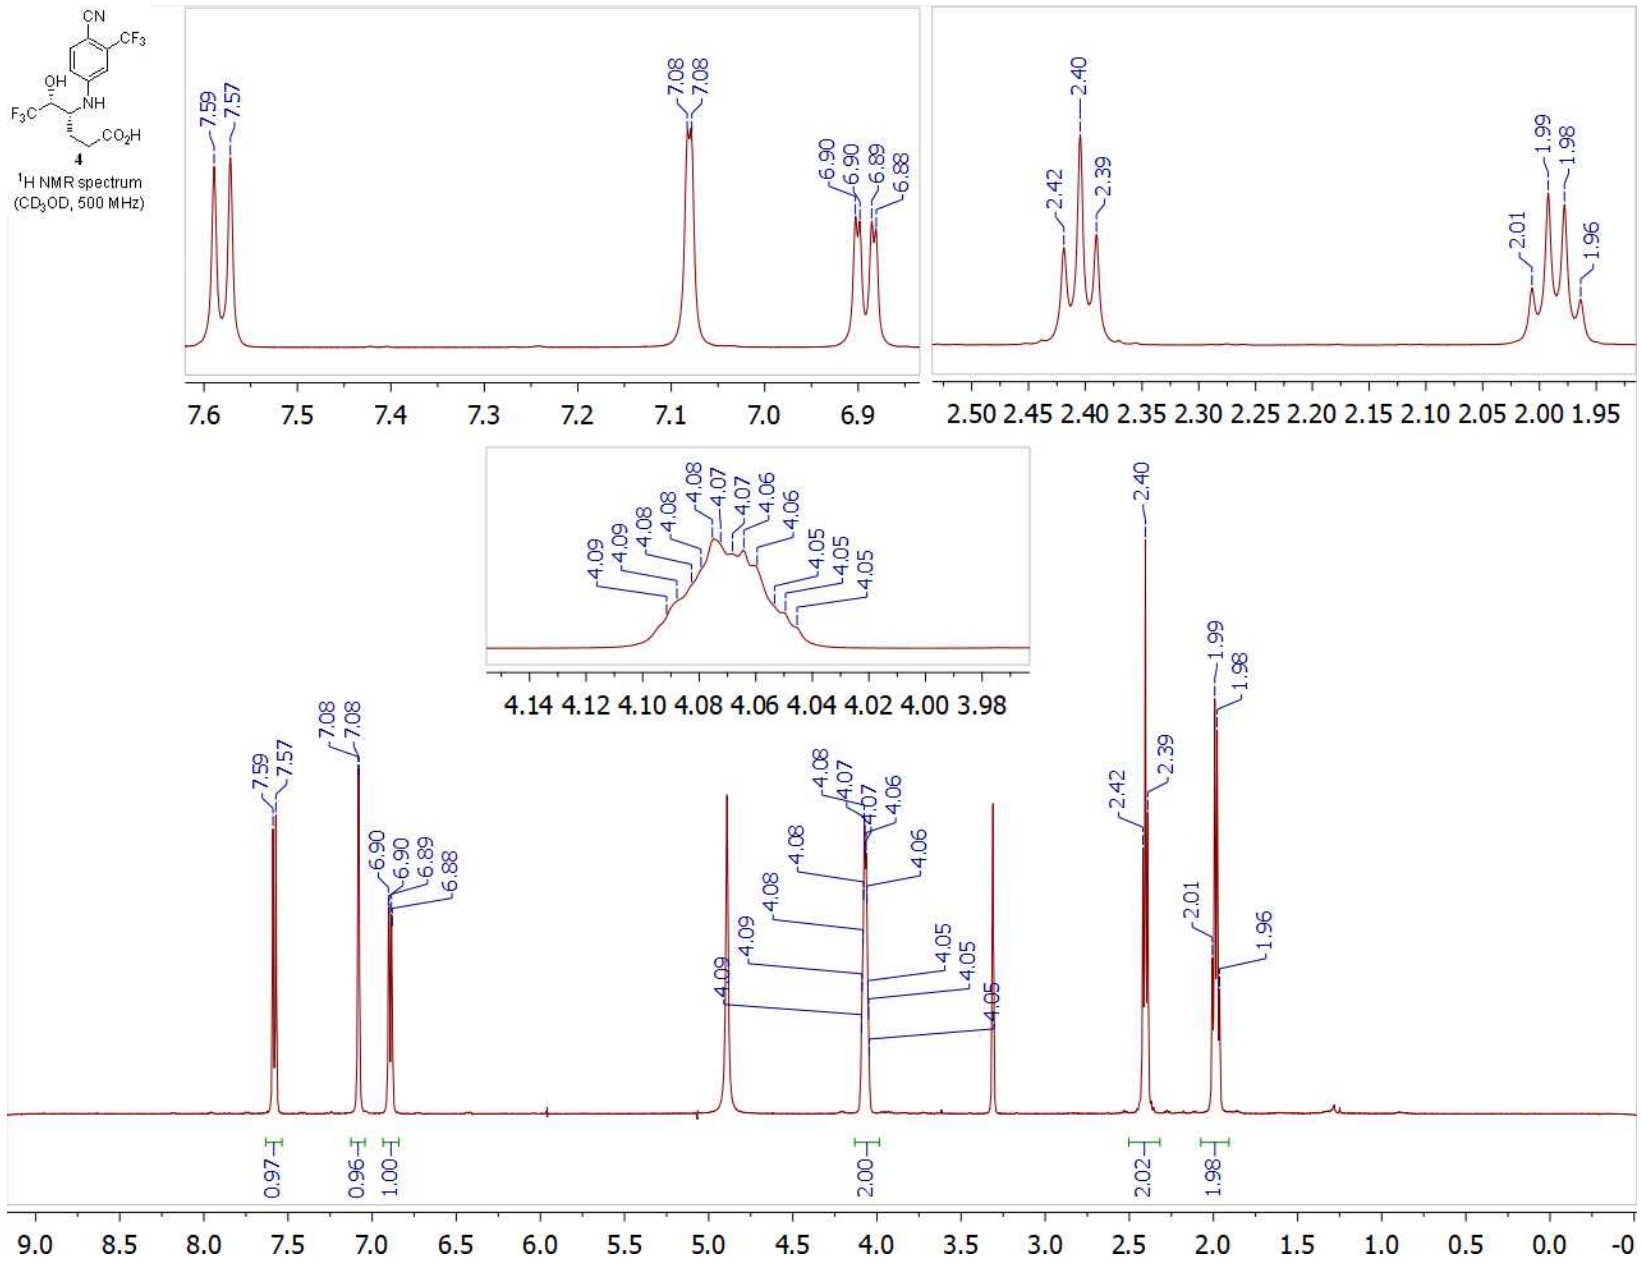

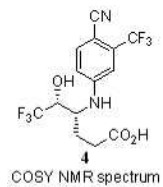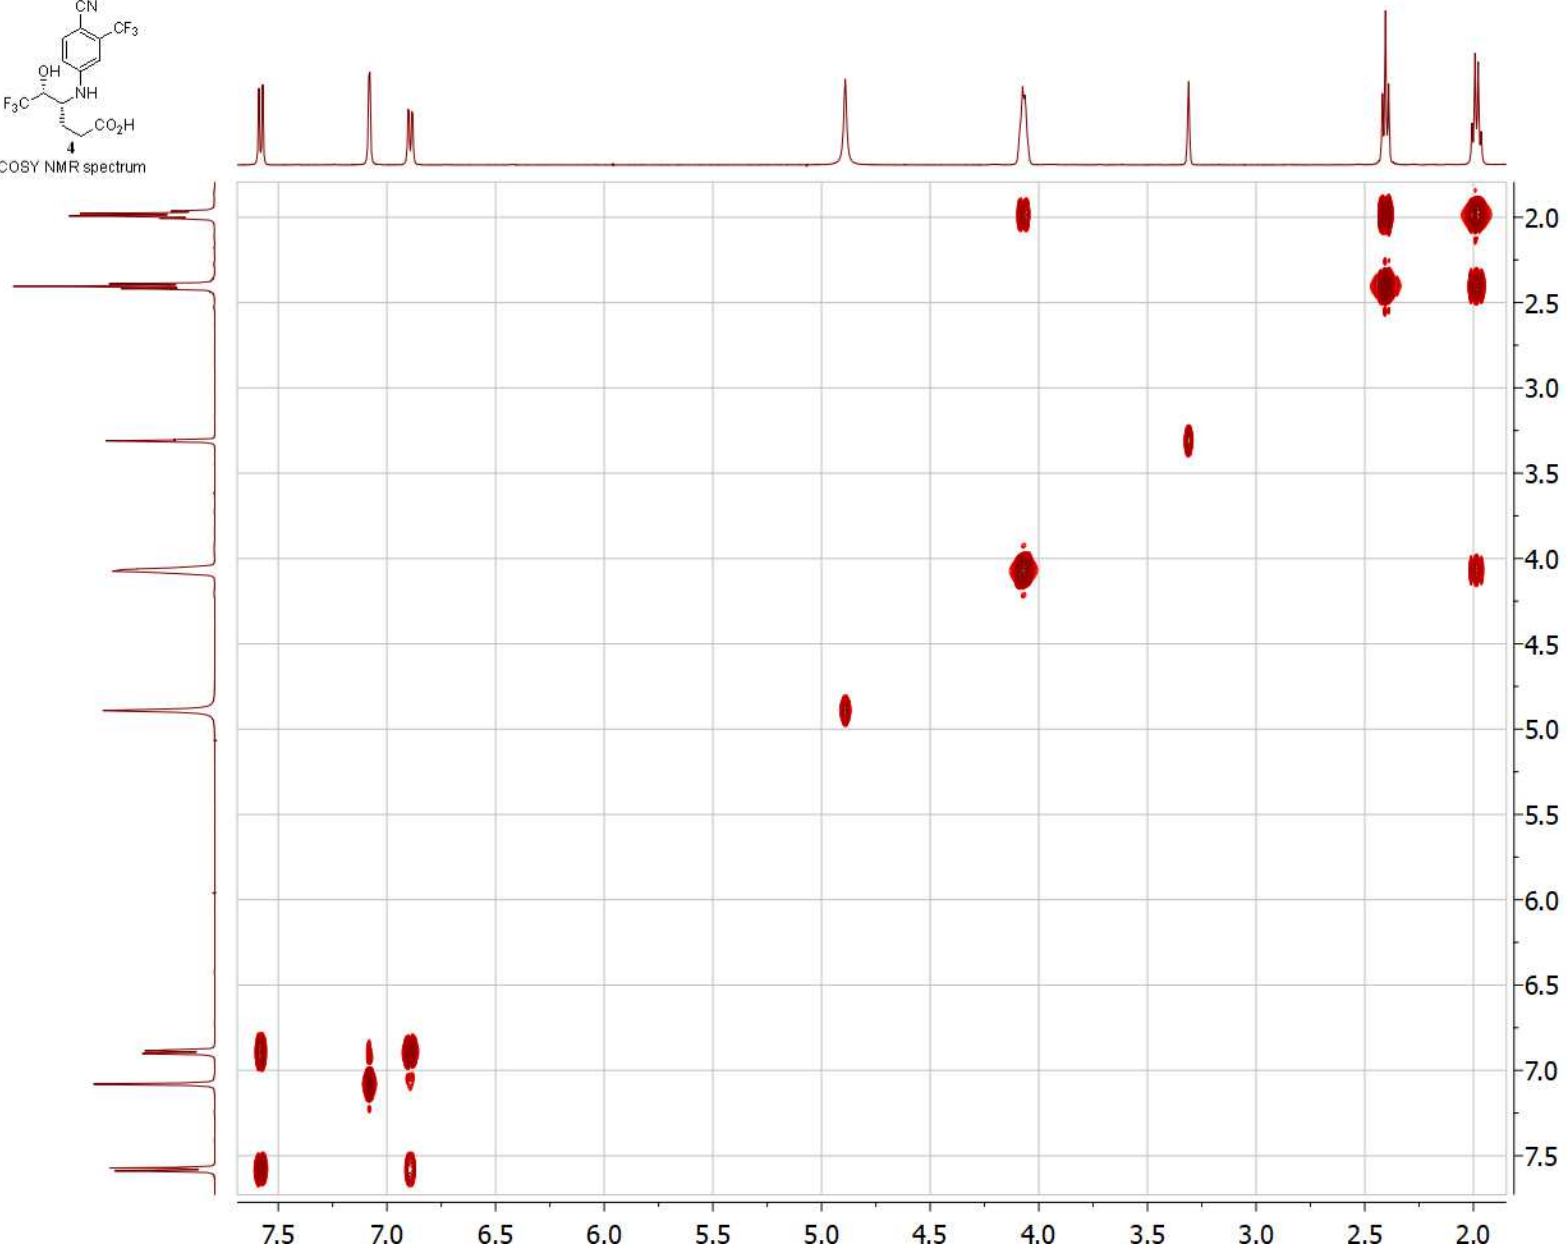

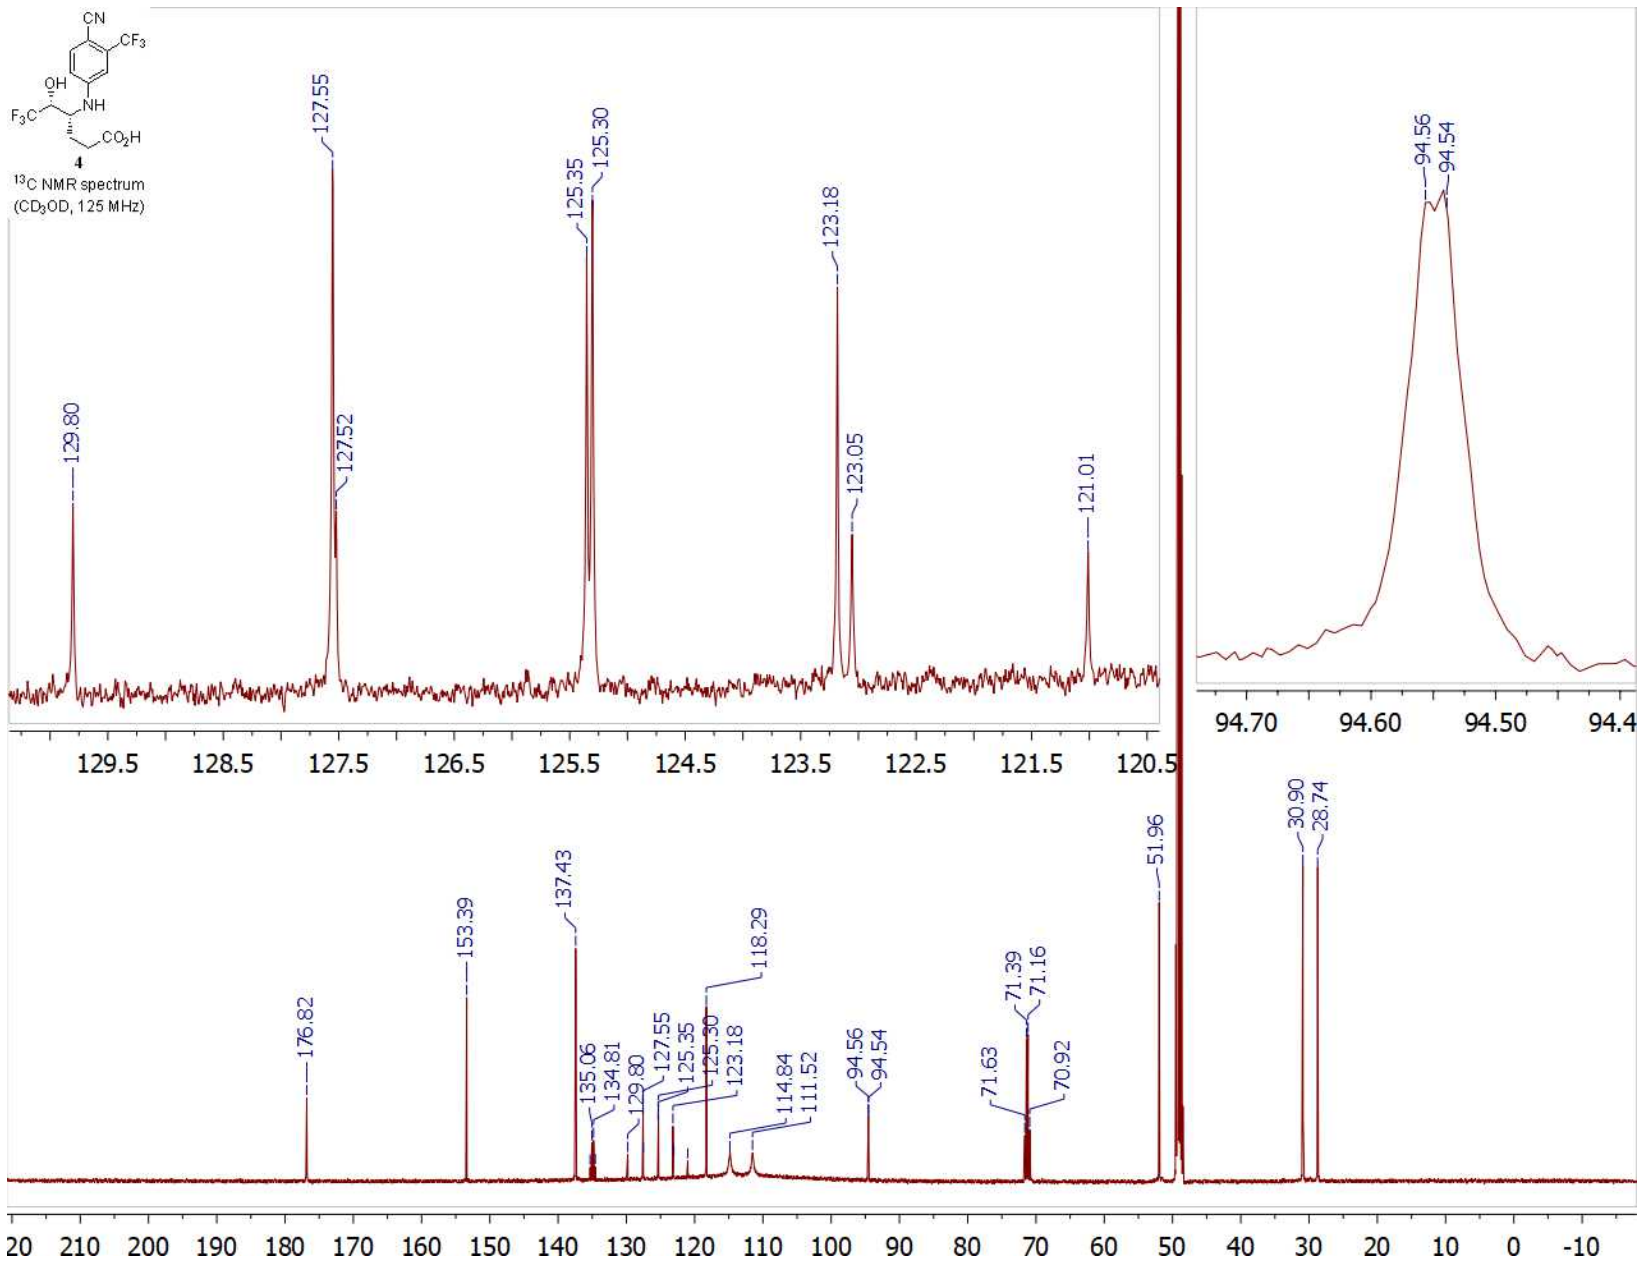



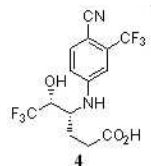

<sup>13</sup>C NMR spectrum  
 (CD<sub>3</sub>OD, 62.5 MHz)

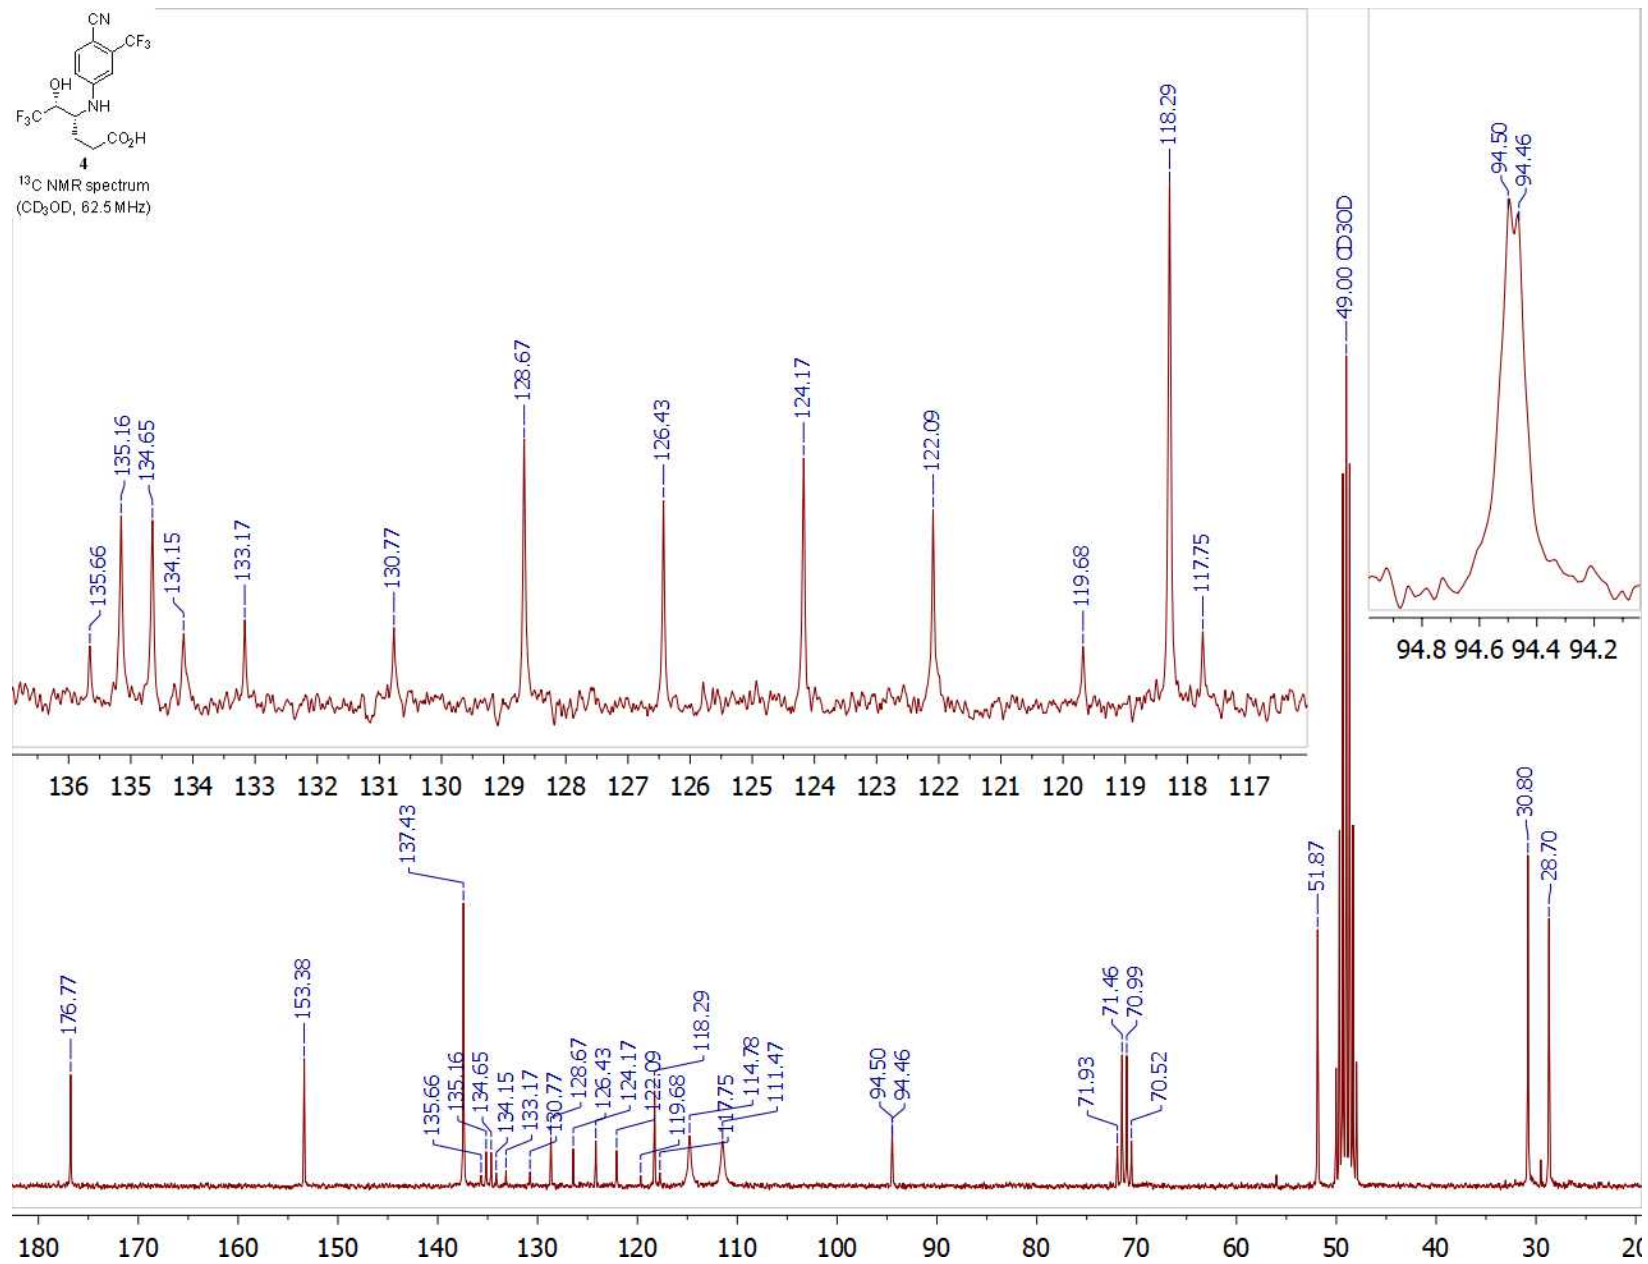



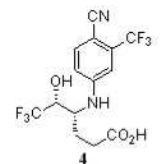

HSQC NMR spectrum

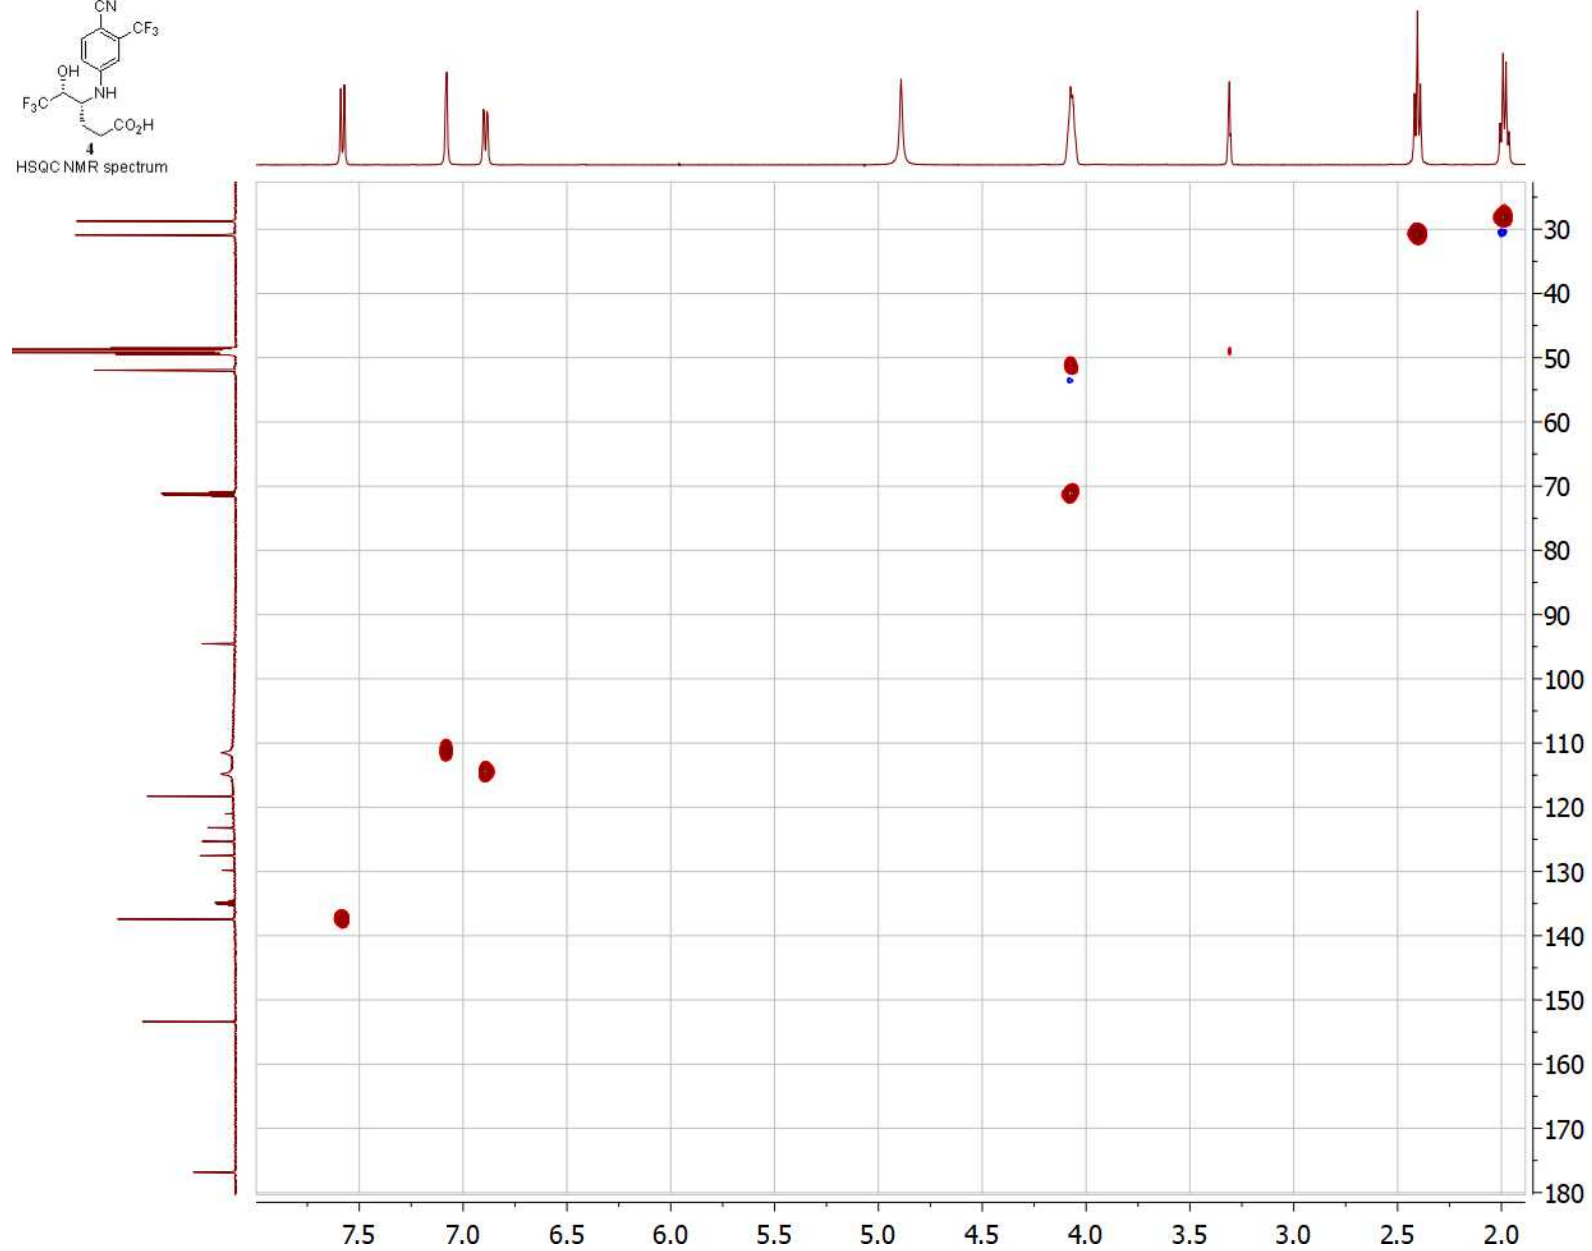

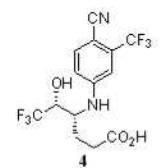

HMBC NMR spectrum

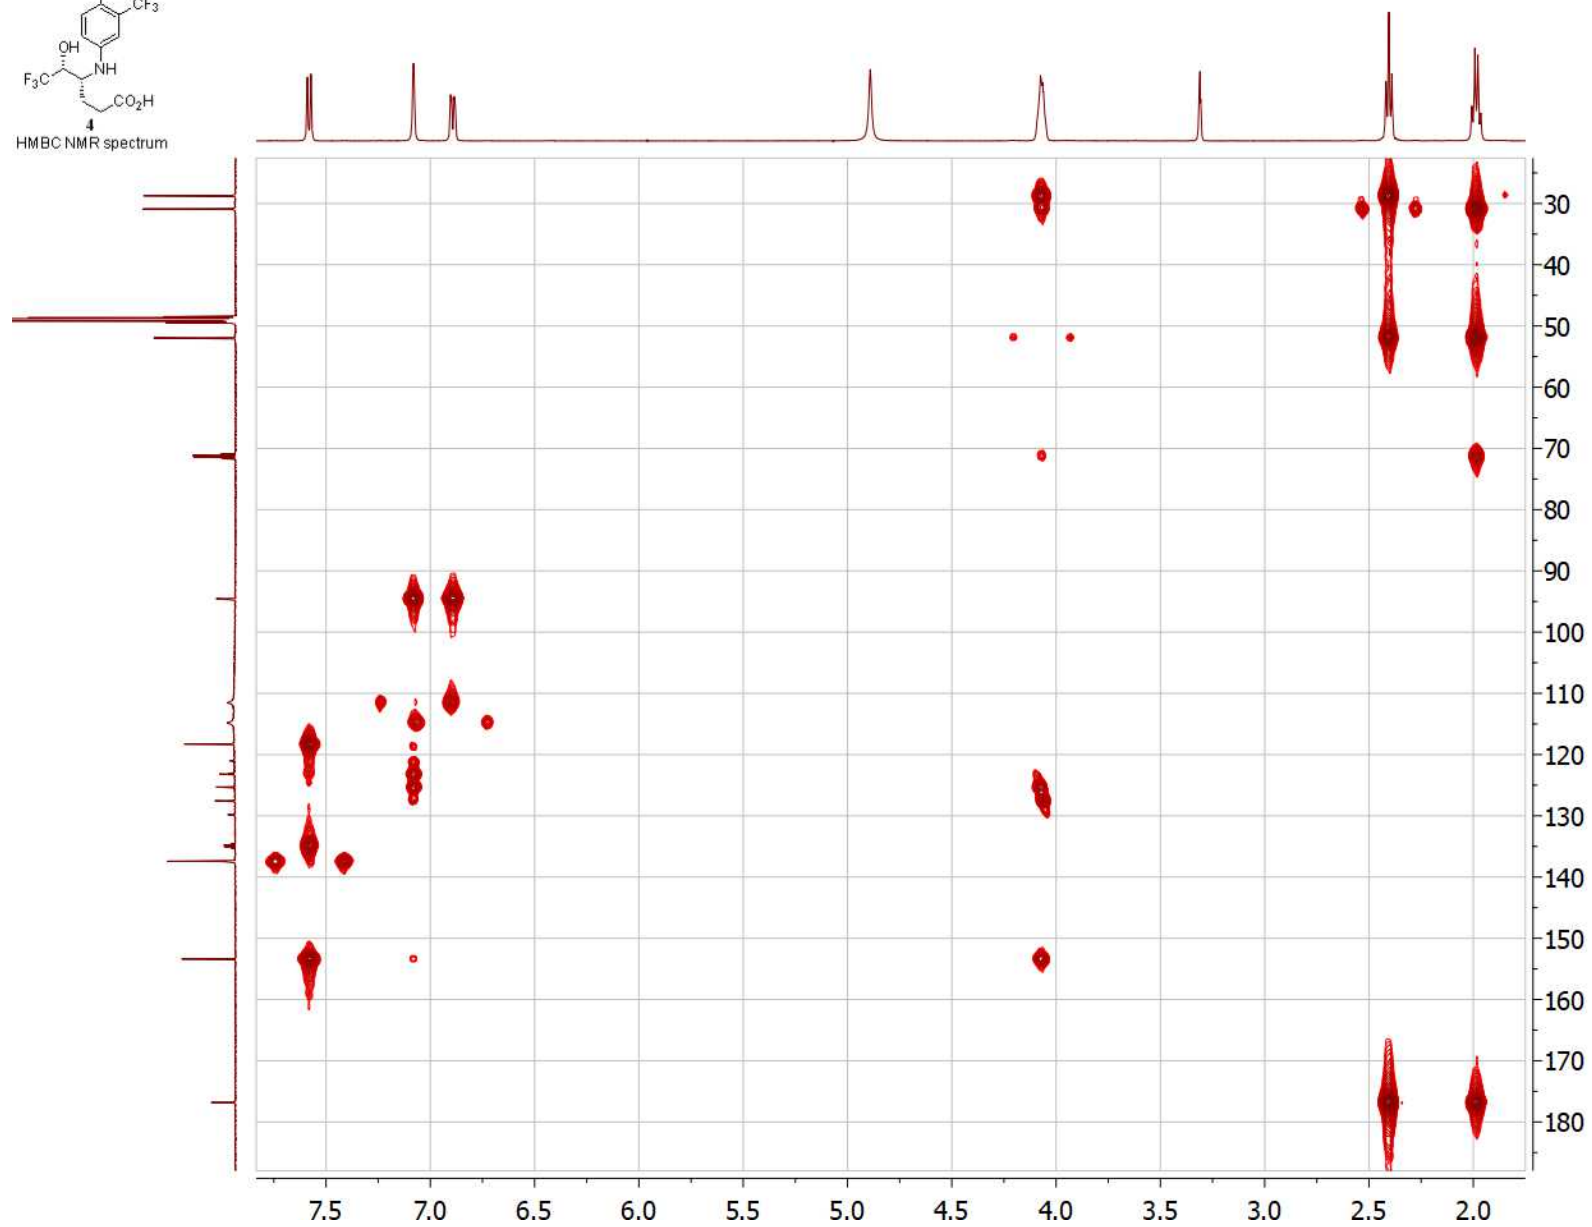

#### IV. LC-HRMS Analysis

L38\_20220520180411 #690 RT: 6.11 AV: 1 NL: 7.08E8  
T: FTMS - p ESI Full ms [150.0000-2000.0000]

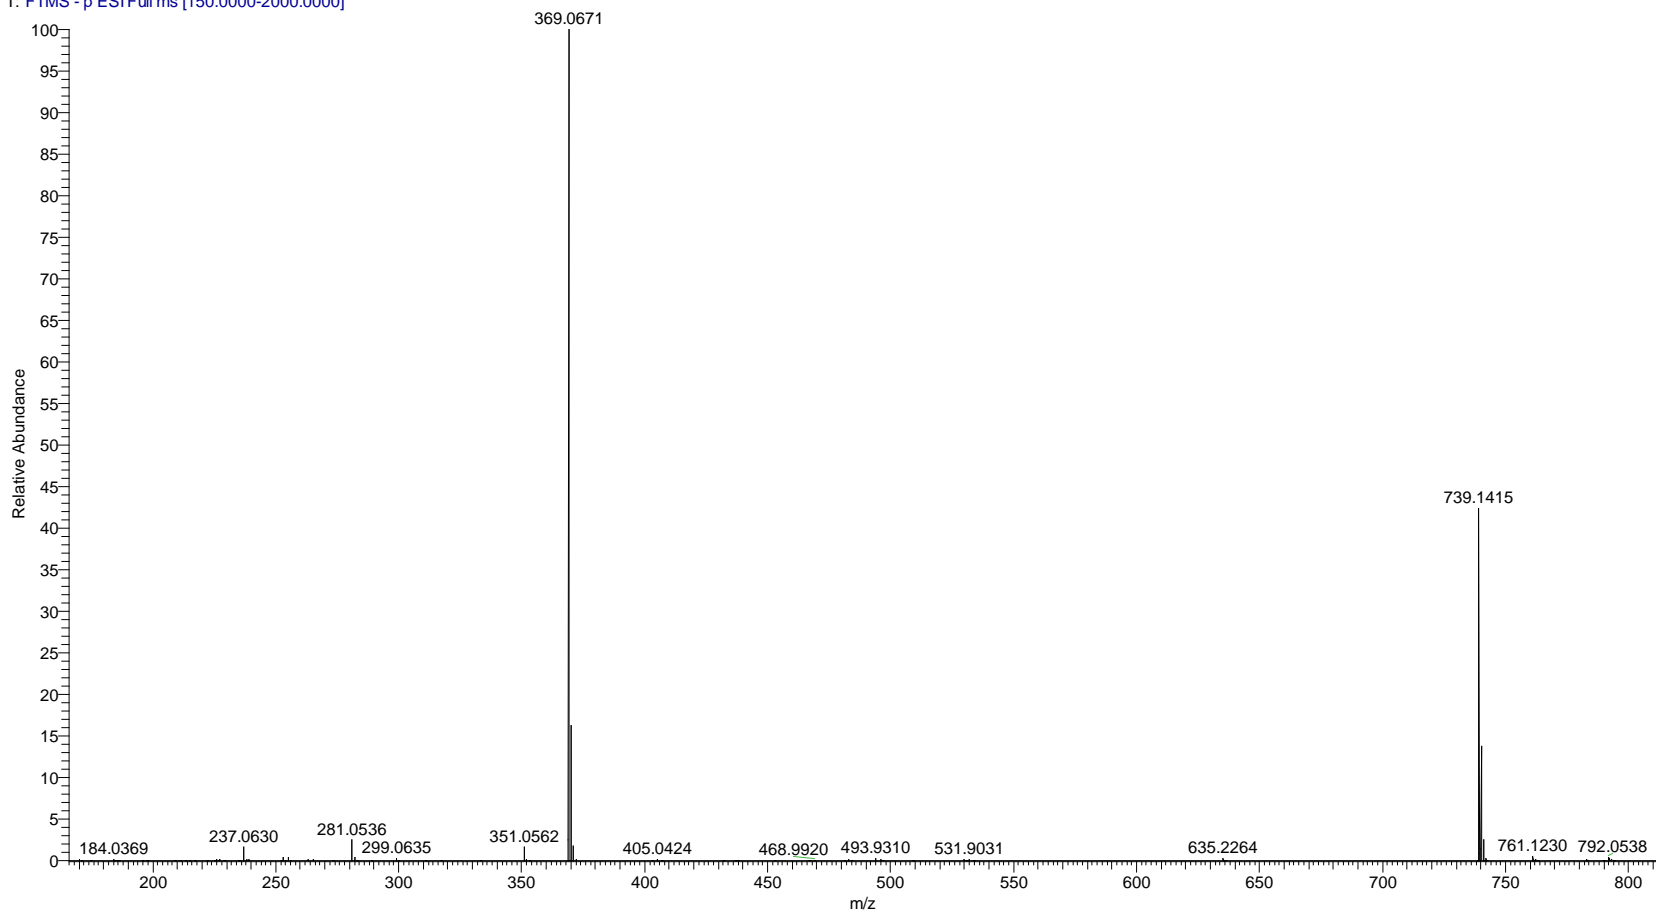

Full scan mass spectrum in negative ionization mode of (4*R*,5*R*)-4-[[4-cyano-3-(trifluoromethyl)phenyl]amino]-6,6,6-trifluoro-5-hydroxyhexanoic acid (**4**).

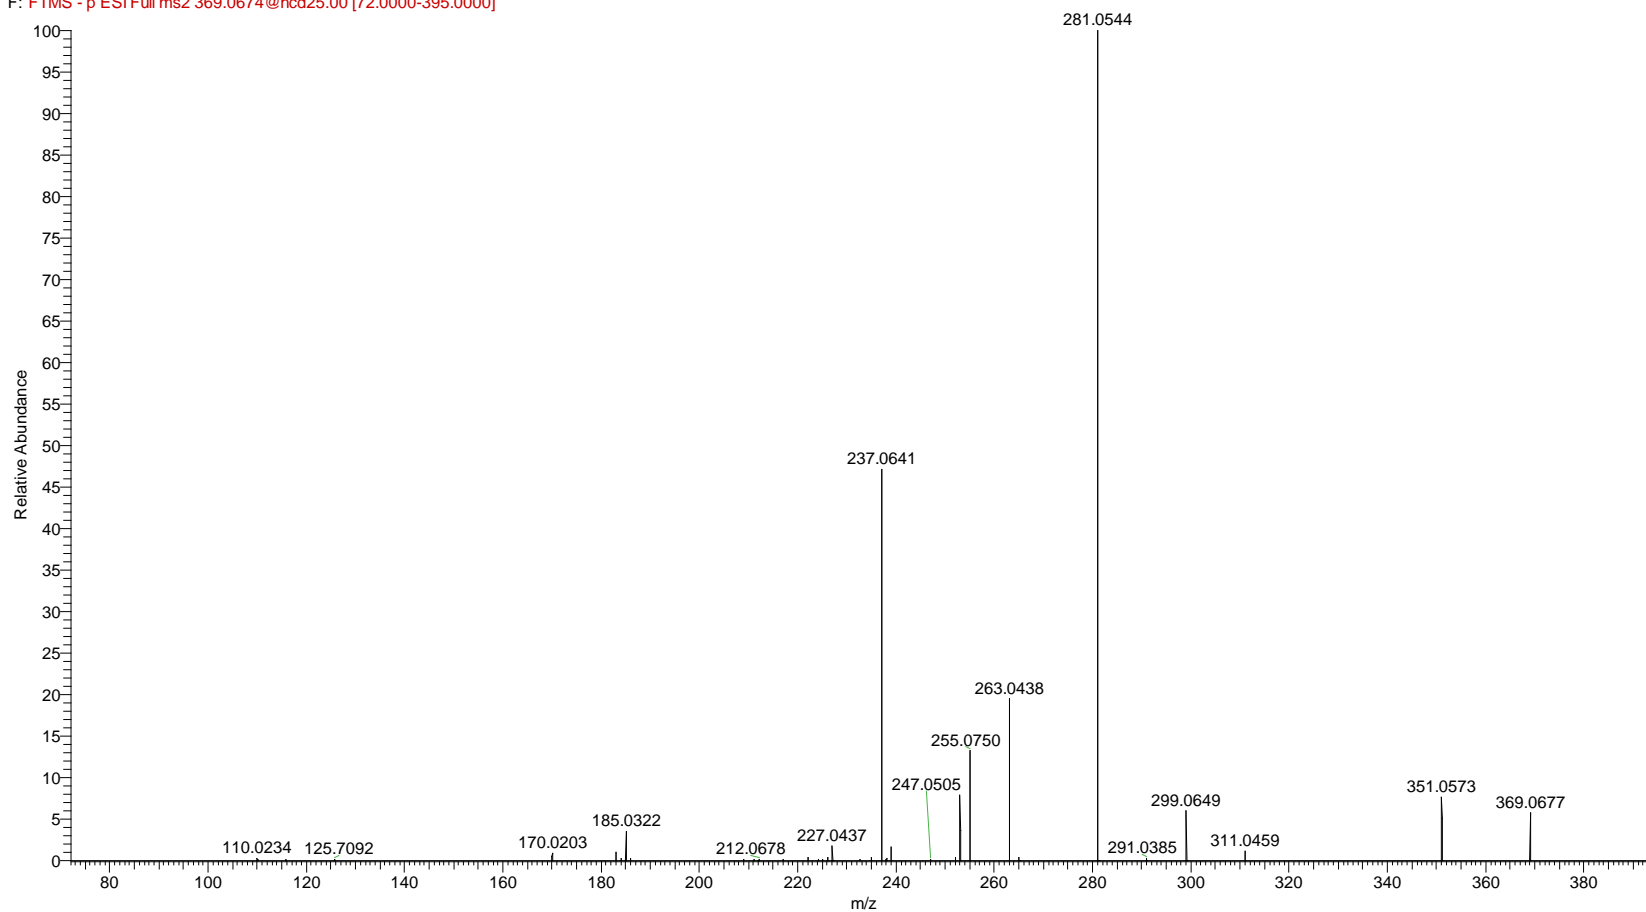

Product ion mass spectrum of the deprotonated molecular ion  $[M-H]^-$  of compound **4** with  $m/z$  369 at a collision energy of 25 eV.

M1677 #1749 RT: 9.28 AV: 1 NL: 2.83E8  
F: FTMS - p ESI Full ms2 369.0679@hcd25.00 [50.0000-395.0000]

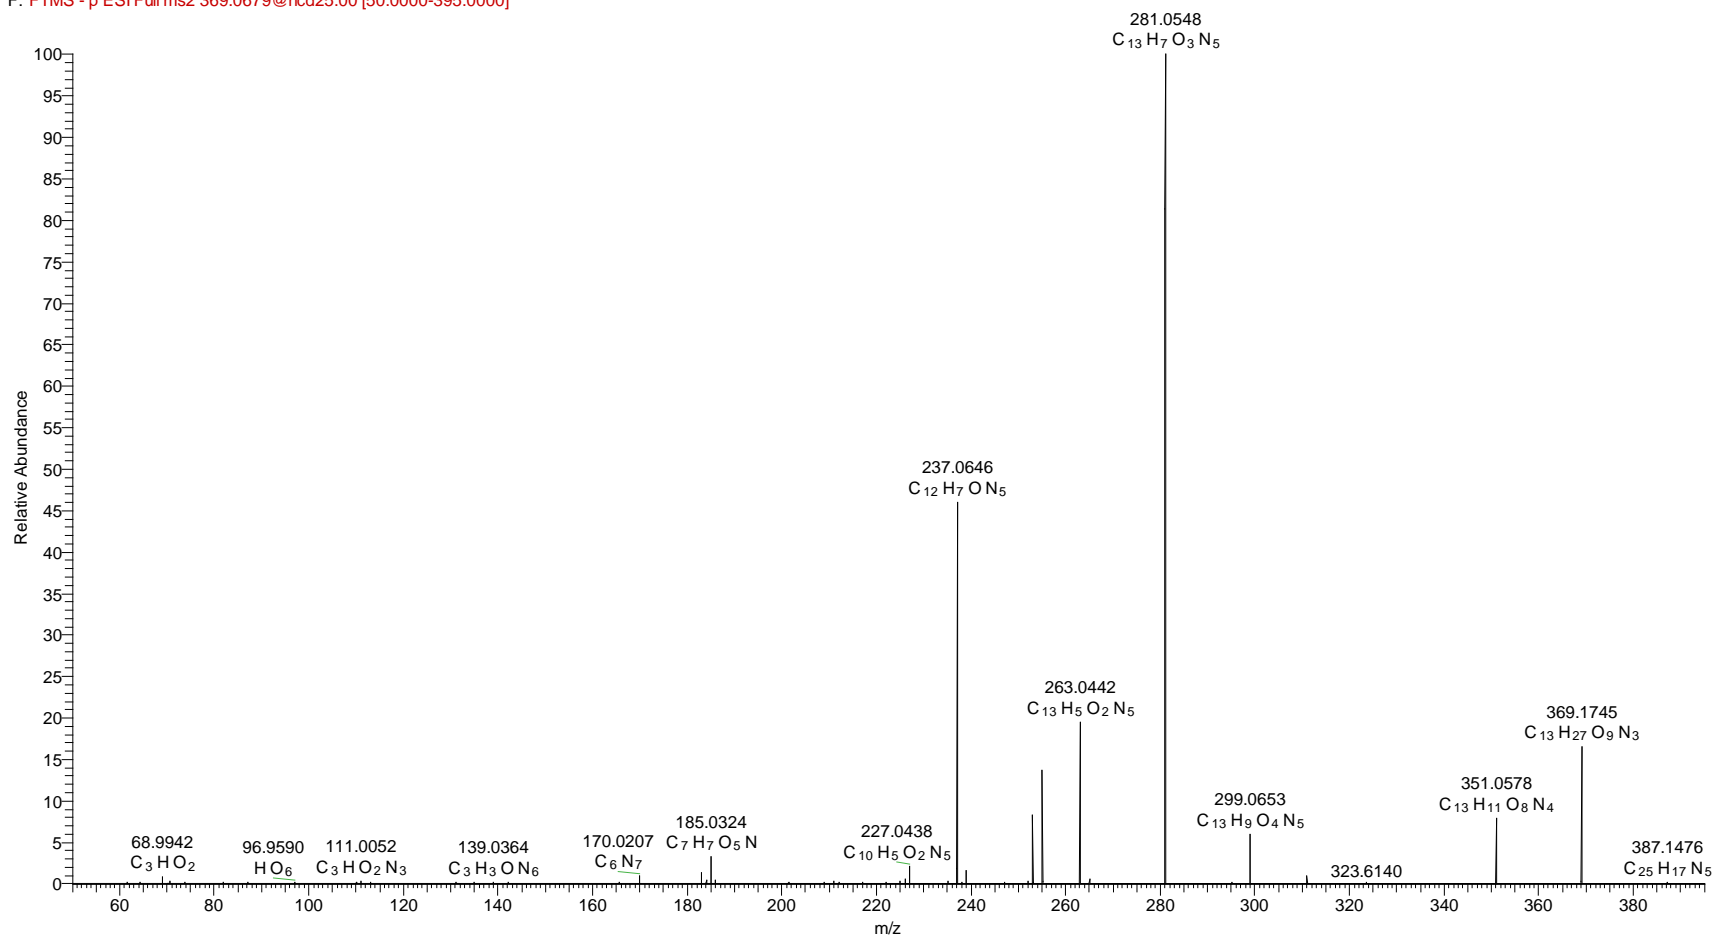

Product ion mass spectrum of the anion with  $m/z$  369 from a LGD-4033-positive human urine sample at a collision energy of 25 eV.

RT: 8.00 - 10.60 SM: 15G

NL: 0  
Base Peak m/z=  
369.0604-369.0752 F:  
FTMS - p ESI Full ms2  
369.0679@hcd25.00  
[50.0000-395.0000] MS  
ICIS BLANK1

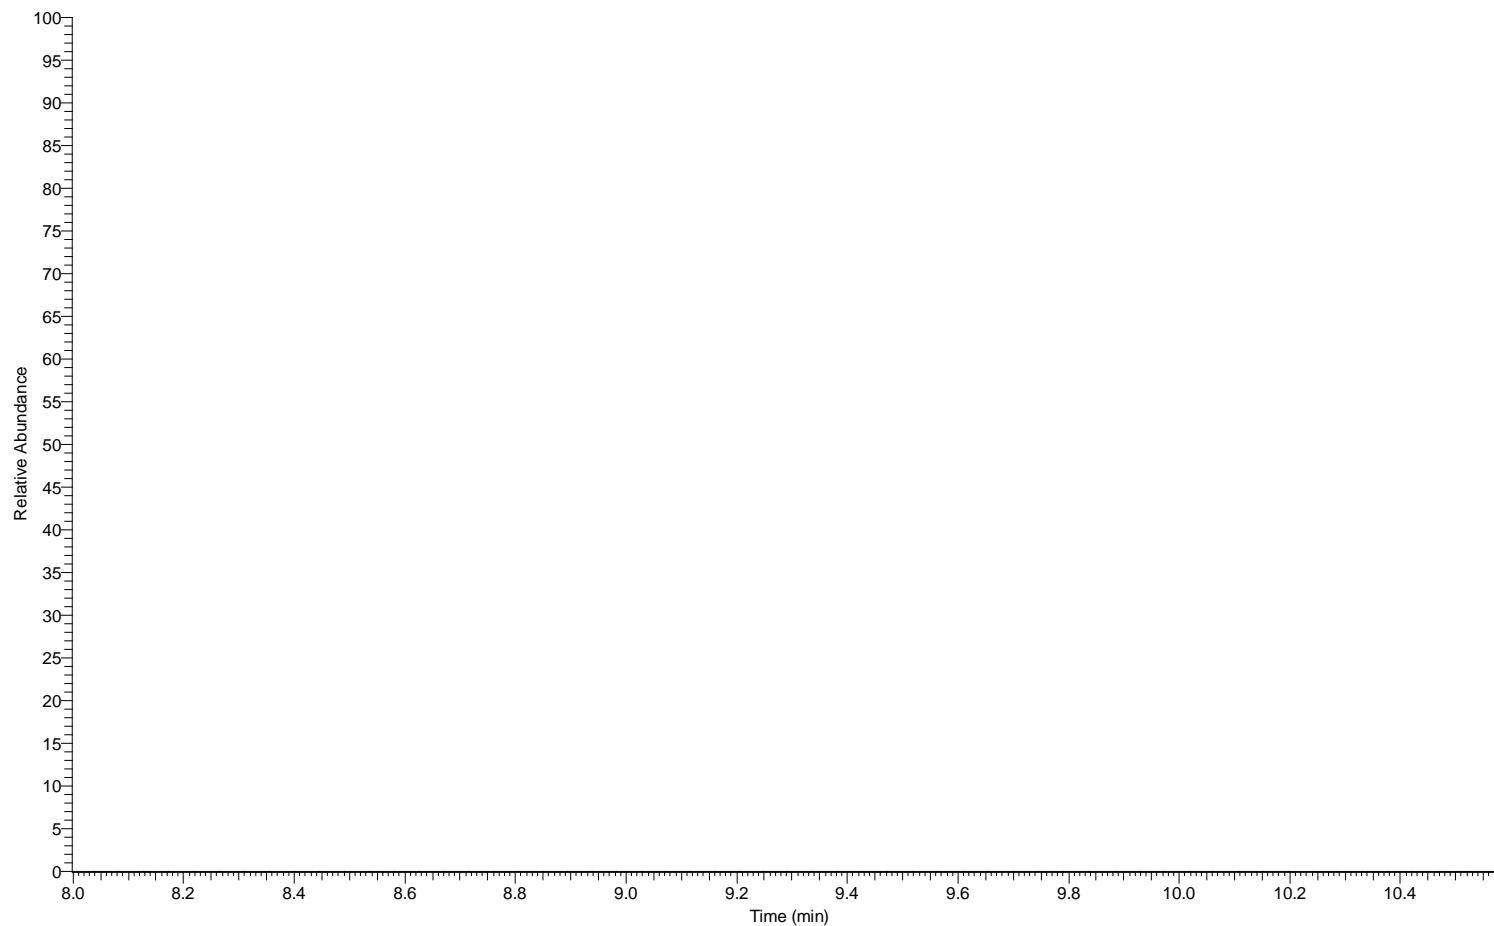

Comparative analysis of 4-arylamino-5-hydroxyhexanoic acid **4** and a LGD-4033-positive human urine sample with LC–HRMS in negative ionization mode at the  $m/z$  369: blank.

RT: 8.00 - 10.60 SM: 15G

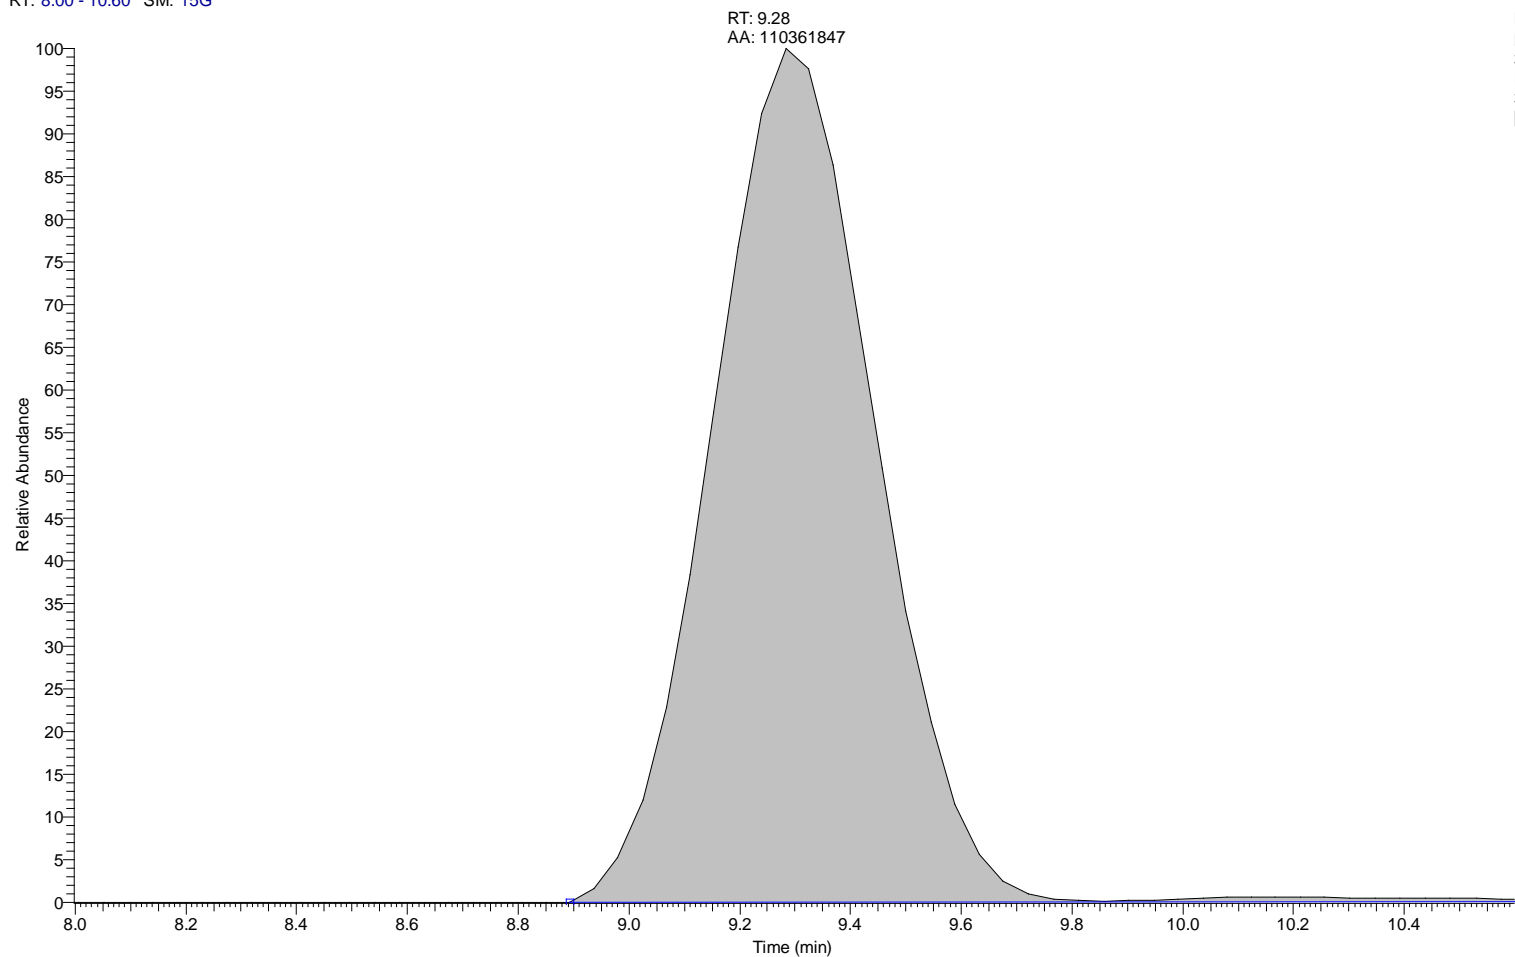

NL: 5.28E6  
Base Peak m/z=  
369.0604-369.0752 F:  
FTMS - p ESI Full ms2  
369.0679@hcd25.00  
[50.0000-395.0000] MS  
ICIS M1677

Comparative analysis of 4-arylamino-5-hydroxyhexanoic acid **4** and a LGD-4033-positive human urine sample with LC–HRMS in negative ionization mode at the  $m/z$  369: urine-derived sample.

RT: 8.00 - 10.60 SM: 15G

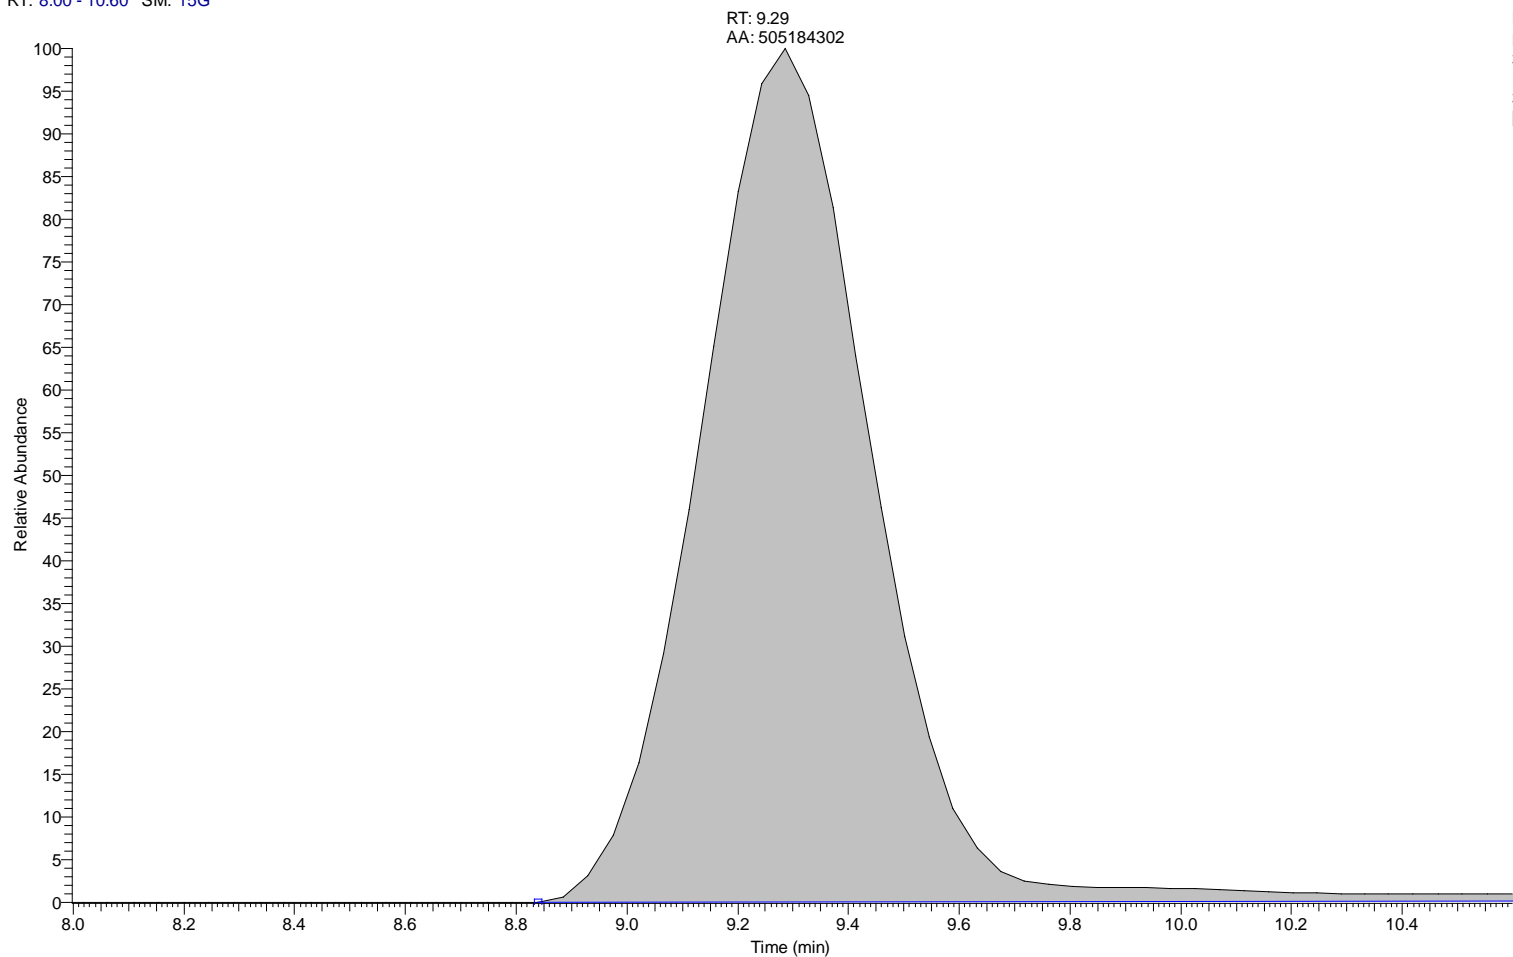

RT: 9.29  
AA: 505184302

NL: 2.28E7  
Base Peak m/z=  
369.0604-369.0752 F:  
FTMS - p ESI Full ms2  
369.0679@hcd25.00  
[50.0000-395.0000] MS  
ICIS LC023

Comparative analysis of 4-arylamino-5-hydroxyhexanoic acid **4** and a LGD-4033-positive human urine sample with LC–HRMS in negative ionization mode at the  $m/z$  369: synthetic metabolite **4**.



RT: 8.00-10.60 SM: 15G

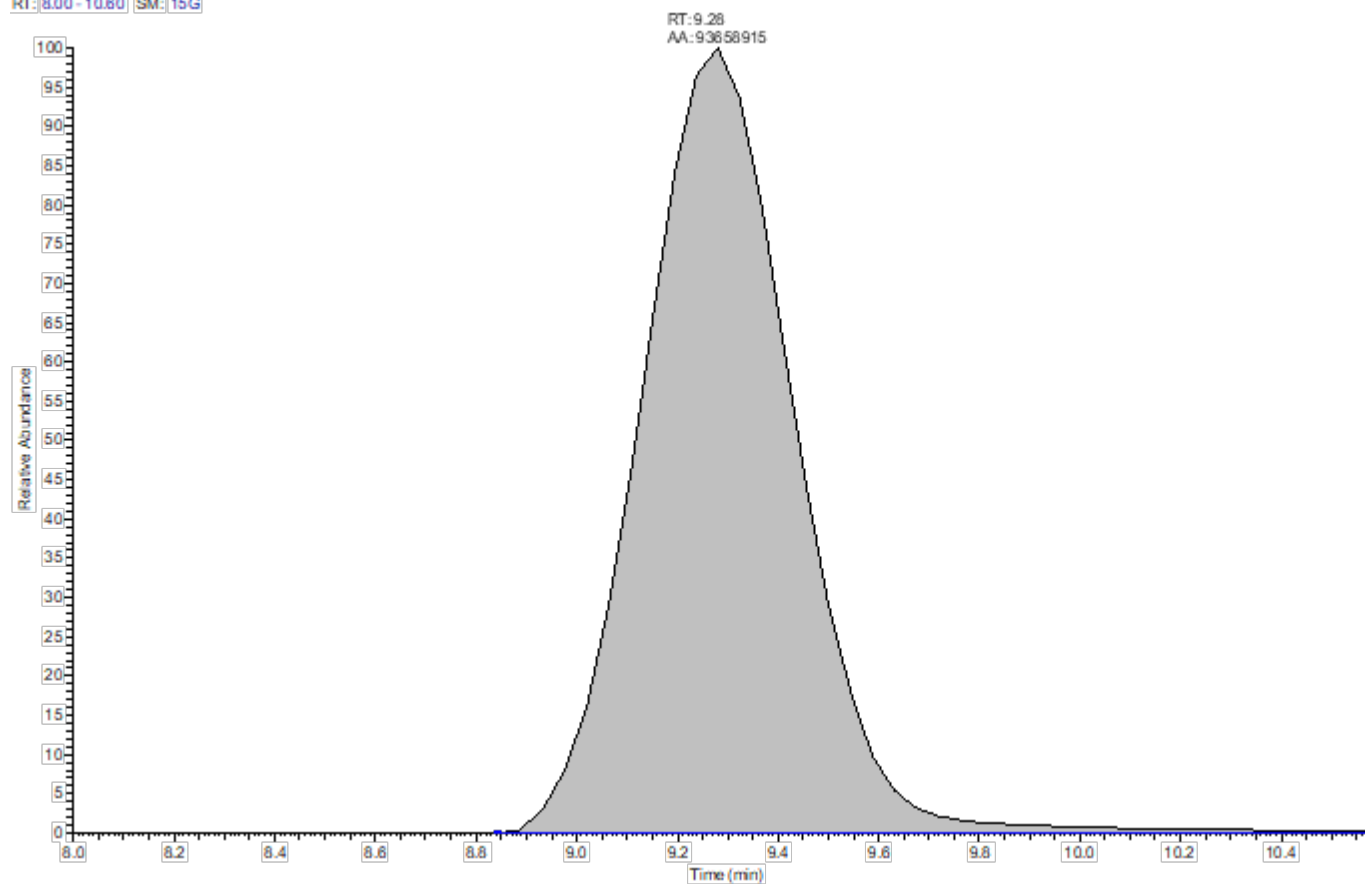

NL: 4.38E6  
Base Peak m/z=  
369.0604-369.0752 F: FTMS -  
p ESIFull ms2  
369.0679@hcd25.00  
[50.0000-395.0000] MS ICIS  
M1677\_AND\_L023

Comparative analysis of 4-arylamino-5-hydroxyhexanoic acid **4** and a LGD-4033-positive human urine sample with LC–HRMS in negative ionization mode at the  $m/z$  369: co-injection of **4** and urine-derived sample.
